# Supplementary material for: Tracking Prostate Carcinogenesis over Time through Urine Proteome Profiling in an Animal Model: An Exploratory Approach
Source: Int J Mol Sci. 2022 Jul 8;23(14):7560. doi: 10.3390/ijms23147560 (PMC9315930; doi:10.3390/ijms23147560)
Supplement: Supplementary file 1 [file ijms-23-07560-s001.zip › Tables S2-S4.xlsx]

## Sheet: PCa1 vs. Cont1
		Cont1					PCa1												Proteins detected in previous studies
Protein IDs	Gene names	LFQ intensity G1C1	LFQ intensity G2C1	LFQ intensity G3C1	LFQ intensity G4C1	LFQ intensity G5C1	LFQ intensity G1C2	LFQ intensity G2C2	LFQ intensity G3C2	LFQ intensity G4C2	LFQ intensity G5C2	Legend	Gene name	log2(Pca1 vs. Cont1)	p-value	Fold change	Gene ontology (biological process)	Gene ontology (cellular component)	Swensen et al., 2021 doi: 10.3389/fmed.2021.548212	Davalieva et al., 2017 doi:10.3390/proteomes6010001	Lima et al., 2022 doi: 10.3390/cancers14082001
Q9Z1Y3	Cdh2	24.5504	24.2445	23.972	24.128	24.4888	23.9146	23.8916	23.3715	24.1067	23.5303	Purple: proteins significantly downregulated in PCa1 vs. Cont1 (p<0.05)	Cdh2	-0.513803	0.018035	1.42781	blood vessel morphogenesis [GO:0048514]; brain development [GO:0007420]; brain morphogenesis [GO:0048854]; calcium-dependent cell-cell adhesion via plasma membrane cell adhesion molecules [GO:0016339]; cell adhesion [GO:0007155]; cell-cell adhesion [GO:0098609]; cell-cell adhesion mediated by cadherin [GO:0044331]; cell-cell adhesion via plasma-membrane adhesion molecules [GO:0098742]; cell-cell …	adherens junction [GO:0005912]; apical part of cell [GO:0045177]; apical plasma membrane [GO:0016324]; apicolateral plasma membrane [GO:0016327]; basolateral plasma membrane [GO:0016323]; catenin complex [GO:0016342]; cell-cell junction [GO:0005911]; cell junction [GO:0030054]; cell surface [GO:0009986]; cytoplasm [GO:0005737]; fascia adherens [GO:0005916]; glutamatergic synapse [GO:0098978]; int…	+	+
Q9QX79	Fetub	27.0607	27.2042	27.4499	27.0341	26.799	26.8179	26.8596	26.5682	27.0057	26.4377	Green: proteins significantly upregulated in PCa1 vs. Cont1 (p<0.05)	Fetub	-0.371767	0.0367636	1.29394	binding of sperm to zona pellucida [GO:0007339]; negative regulation of endopeptidase activity [GO:0010951]; single fertilization [GO:0007338]	extracellular region [GO:0005576]; extracellular space [GO:0005615]
P04916	Rbp4	26.3988	25.905	25.7626	26.0145	26.1318	26.208	26.3184	26.3517	26.4831	26.3162	Blue: proteins whose abundance is not statistically signficant between PCa1 and Cont1 (p>0.05)	Rbp4	0.292935	0.0362549	1.22513	cardiac muscle tissue development [GO:0048738]; detection of light stimulus involved in visual perception [GO:0050908]; embryonic organ morphogenesis [GO:0048562]; embryonic retina morphogenesis in camera-type eye [GO:0060059]; embryonic skeletal system development [GO:0048706]; eye development [GO:0001654]; female genitalia morphogenesis [GO:0048807]; gluconeogenesis [GO:0006094]; glucose homeos…	extracellular space [GO:0005615]; protein-containing complex [GO:0032991]			+
O35217	Minpp1	25.9774	25.5756	25.308	25.5175	25.8746	26.0891	26.0831	25.6427	26.3469	26.0138		Minpp1	0.384488	0.0497872	1.3054	phosphatidylinositol-mediated signaling [GO:0048015]	endoplasmic reticulum lumen [GO:0005788]	+
Q4QQW8	Plbd2	24.6341	24.63	23.882	24.2691	24.3175	24.3933	25.2644	25.4467	25.3412	24.9523		Plbd2	0.733058	0.0144155	1.66216	phospholipid catabolic process [GO:0009395]	extracellular region [GO:0005576]; lysosomal lumen [GO:0043202]; lysosome [GO:0005764]	+
P17164	Fuca1	24.2038	23.6812	22.7473	22.7609	23.0593	24.3971	24.6875	23.4751	24.3003	24.331		Fuca1	0.947692	0.0264735	1.92878	fucose metabolic process [GO:0006004]; glycoside catabolic process [GO:0016139]; lipid metabolic process [GO:0006629]	lysosome [GO:0005764]
P36953	Afm	30.1761	29.6929	29.7008	29.0086	29.601	29.6732	30.2442	30.23	30.7048	30.0556		Afm	0.545667	0.0604717	1.45969	protein stabilization [GO:0050821]; protein transport within extracellular region [GO:0071693]; vitamin transport [GO:0051180]	cytoplasm [GO:0005737]; extracellular space [GO:0005615]
Q01460	Ctbs	27.4219	26.745	26.6053	26.307	26.1104	27.4787	27.7498	27.1923	27.1383	26.6546		Ctbs	0.604832	0.0708407	1.5208	chitin catabolic process [GO:0006032]; oligosaccharide catabolic process [GO:0009313]	lysosome [GO:0005764]
P06399-2	Fga	22.8376	22.9175	21.8229	22.1174	22.1231	23.0192	22.1276	22.9557	24.3264	23.7216		Fga	0.866416	0.0794352	1.82313	acute-phase response [GO:0006953]; adaptive immune response [GO:0002250]; blood coagulation [GO:0007596]; blood coagulation, common pathway [GO:0072377]; blood coagulation, fibrin clot formation [GO:0072378]; cell-matrix adhesion [GO:0007160]; cellular response to granulocyte colony-stimulating factor [GO:1990643]; cellular response to interleukin-6 [GO:0071354]; cellular response to organic cycl…	blood microparticle [GO:0072562]; cell cortex [GO:0005938]; cell surface [GO:0009986]; cytoplasm [GO:0005737]; external side of plasma membrane [GO:0009897]; extracellular space [GO:0005615]; fibrinogen complex [GO:0005577]; platelet alpha granule [GO:0031091]; rough endoplasmic reticulum [GO:0005791]; synapse [GO:0045202]
Q9EPB1	Dpp7	29.5408	28.8326	28.521	28.5443	29.0763	29.2231	29.3915	29.1973	29.1439	29.5964		Dpp7	0.407461	0.0839349	1.32635	lysosomal protein catabolic process [GO:1905146]; protein catabolic process [GO:0030163]; proteolysis [GO:0006508]	cytoplasmic vesicle [GO:0031410]; cytosol [GO:0005829]; extracellular region [GO:0005576]; lysosome [GO:0005764]; vesicle [GO:0031982]
P04276	Gc	27.6337	28.0317	27.9256	27.8285	27.8663	27.6685	27.7412	27.3971	27.9117	27.42		Gc	-0.229471	0.0872245	1.1724	female pregnancy [GO:0007565]; lactation [GO:0007595]; response to estradiol [GO:0032355]; response to nutrient levels [GO:0031667]; response to steroid hormone [GO:0048545]; vitamin D metabolic process [GO:0042359]	axon [GO:0030424]; cytoplasm [GO:0005737]; cytosol [GO:0005829]; extracellular space [GO:0005615]; perinuclear region of cytoplasm [GO:0048471]
P97546-3	Nptn	24.5234	25.4197	24.8805	25.0259	24.2858	25.5306	25.1025	25.1644	25.8517	24.9118		Nptn	0.485128	0.0981619	1.39971	axon guidance [GO:0007411]; cellular calcium ion homeostasis [GO:0006874]; dendrite self-avoidance [GO:0070593]; excitatory synapse assembly [GO:1904861]; homophilic cell adhesion via plasma membrane adhesion molecules [GO:0007156]; long-term synaptic potentiation [GO:0060291]; modulation of chemical synaptic transmission [GO:0050804]; negative regulation of cytokine production [GO:0001818]; posi…	axon [GO:0030424]; cell surface [GO:0009986]; dendrite [GO:0030425]; GABA-ergic synapse [GO:0098982]; glutamatergic synapse [GO:0098978]; immunological synapse [GO:0001772]; inhibitory synapse [GO:0060077]; integral component of membrane [GO:0016021]; integral component of postsynaptic density membrane [GO:0099061]; integral component of presynaptic active zone membrane [GO:0099059]; plasma membr…
Q64230	Mep1a	30.2957	30.7056	30.3912	30.4776	30.3236	30.3602	30.3161	30.2252	30.3699	29.9535		Mep1a	-0.193736	0.107164	1.14372	proteolysis [GO:0006508]	membrane [GO:0016020]; meprin A complex [GO:0017090]
Q9R0T4	Cdh1	30.8884	30.7606	30.9455	31.0368	31.0292	30.756	31.0876	31.2804	31.2781	31.2327		Cdh1	0.194842	0.118693	1.1446	actin cytoskeleton reorganization [GO:0031532]; adherens junction organization [GO:0034332]; bicellular tight junction assembly [GO:0070830]; calcium-dependent cell-cell adhesion via plasma membrane cell adhesion molecules [GO:0016339]; cell-cell adhesion [GO:0098609]; cell-cell adhesion mediated by cadherin [GO:0044331]; cell-cell adhesion via plasma-membrane adhesion molecules [GO:0098742]; cel…	actin cytoskeleton [GO:0015629]; adherens junction [GO:0005912]; apical junction complex [GO:0043296]; apical part of cell [GO:0045177]; axon [GO:0030424]; axon terminus [GO:0043679]; basolateral plasma membrane [GO:0016323]; catenin complex [GO:0016342]; cell-cell junction [GO:0005911]; cell junction [GO:0030054]; cell periphery [GO:0071944]; cell surface [GO:0009986]; cortical actin cytoskeleto…
P07647	Klk9	31.2839	31.1774	31.7887	31.1573	31.5667	31.1787	33.2531	32.3026	31.1774	33.2752		Klk9	0.842589	0.118962	1.79327	positive regulation of vasoconstriction [GO:0045907]; regulation of systemic arterial blood pressure [GO:0003073]; zymogen activation [GO:0031638]	secretory granule [GO:0030141]
P18292	F2	28.3083	27.6816	28.2045	28.0236	27.4656	27.7182	27.5911	27.8386	27.7153	26.8847		F2	-0.387114	0.135491	1.30777	acute-phase response [GO:0006953]; antimicrobial humoral immune response mediated by antimicrobial peptide [GO:0061844]; blood coagulation [GO:0007596]; cell surface receptor signaling pathway [GO:0007166]; cellular response to mechanical stimulus [GO:0071260]; cytolysis by host of symbiont cells [GO:0051838]; fibrinolysis [GO:0042730]; negative regulation of astrocyte differentiation [GO:0048712…	collagen-containing extracellular matrix [GO:0062023]; extracellular space [GO:0005615]
P56574	Idh2	24.7907	24.685	23.6042	24.1407	24.2399	23.5982	23.7401	23.9978	23.7704	24.4055		Idh2	-0.389701	0.164948	1.31012	2-oxoglutarate metabolic process [GO:0006103]; glyoxylate cycle [GO:0006097]; isocitrate metabolic process [GO:0006102]; NADP biosynthetic process [GO:0006741]; NADP metabolic process [GO:0006739]; negative regulation of glial cell migration [GO:1903976]; negative regulation of glial cell proliferation [GO:0060253]; negative regulation of matrix metallopeptidase secretion [GO:1904465]; tricarboxy…	cytosol [GO:0005829]; mitochondrion [GO:0005739]; peroxisome [GO:0005777]
P24268	Ctsd	27.619	26.7696	27.1187	27.277	27.1133	27.1519	27.6116	27.9786	27.5201	27.1957		Ctsd	0.312048	0.165038	1.24147	autophagosome assembly [GO:0000045]; lipoprotein catabolic process [GO:0042159]; positive regulation of apoptotic process [GO:0043065]; positive regulation of cysteine-type endopeptidase activity involved in apoptotic process [GO:0043280]; proteolysis [GO:0006508]; regulation of establishment of protein localization [GO:0070201]; response to nutrient levels [GO:0031667]	endosome membrane [GO:0010008]; extracellular space [GO:0005615]; lysosomal membrane [GO:0005765]; lysosome [GO:0005764]; melanosome [GO:0042470]; membrane raft [GO:0045121]
P19112	Fbp1	26.2976	26.4573	26.3184	28.0948	26.3706	25.721	26.1293	25.4809	26.4903	26.6484		Fbp1	-0.61378	0.174954	1.53026	carbohydrate metabolic process [GO:0005975]; cellular response to insulin stimulus [GO:0032869]; cellular response to magnesium ion [GO:0071286]; cellular response to xenobiotic stimulus [GO:0071466]; dephosphorylation [GO:0016311]; fructose 1,6-bisphosphate metabolic process [GO:0030388]; fructose 6-phosphate metabolic process [GO:0006002]; fructose metabolic process [GO:0006000]; gluconeogenesi…	cytoplasm [GO:0005737]; cytosol [GO:0005829]; nucleus [GO:0005634]
P10959	Ces1c	29.2724	28.9982	28.8649	27.5324	28.4425	28.8621	29.113	29.3867	29.2116	28.8733		Ces1c	0.467276	0.182097	1.3825	lipid catabolic process [GO:0016042]	endoplasmic reticulum [GO:0005783]; endoplasmic reticulum lumen [GO:0005788]; lipid droplet [GO:0005811]
P23680	Apcs	27.2071	26.9618	26.8782	26.951	27.353	27.2086	27.2669	27.0162	27.2233	27.4235		Apcs	0.157476	0.193835	1.11533	complement activation, classical pathway [GO:0006958]; innate immune response [GO:0045087]; negative regulation by host of viral exo-alpha-sialidase activity [GO:0044869]; negative regulation by host of viral glycoprotein metabolic process [GO:0044871]; negative regulation by host of viral process [GO:0044793]; negative regulation of exo-alpha-sialidase activity [GO:1903016]; negative regulation …	extracellular space [GO:0005615]; protein-containing complex [GO:0032991]
P27590	Umod	31.221	34.1609	33.3574	33.4317	32.0673	33.6827	31.465	30.4241	32.3201	30.8516		Umod	-1.09895	0.198486	2.14199	apoptotic process [GO:0006915]; apoptotic signaling pathway [GO:0097190]; autophagy [GO:0006914]; calcium ion homeostasis [GO:0055074]; cellular calcium ion homeostasis [GO:0006874]; cellular chloride ion homeostasis [GO:0030644]; cellular phosphate ion homeostasis [GO:0030643]; cellular response to unfolded protein [GO:0034620]; cellular sodium ion homeostasis [GO:0006883]; chaperone-mediated pr…	anchored component of membrane [GO:0031225]; apical part of cell [GO:0045177]; apical plasma membrane [GO:0016324]; basolateral plasma membrane [GO:0016323]; cell surface [GO:0009986]; ciliary membrane [GO:0060170]; cilium [GO:0005929]; cytoplasmic vesicle [GO:0031410]; endoplasmic reticulum [GO:0005783]; extracellular space [GO:0005615]; Golgi apparatus [GO:0005794]; membrane raft [GO:0045121]; …
P01946	Hba1	26.8083	25.8495	28.3709	30.9167	30.6237	25.6034	23.5331	24.3399	31.5699	25.4507		Hba1	-2.41441	0.202605	5.33103	cellular oxidant detoxification [GO:0098869]; erythrocyte development [GO:0048821]; hydrogen peroxide catabolic process [GO:0042744]; in utero embryonic development [GO:0001701]; negative regulation of blood pressure [GO:0045776]; regulation of sensory perception of pain [GO:0051930]; response to bacterium [GO:0009617]; response to stilbenoid [GO:0035634]	haptoglobin-hemoglobin complex [GO:0031838]; hemoglobin complex [GO:0005833]; synapse [GO:0045202]
P22057	Ptgds	29.4012	29.3926	29.3537	29.4356	29.6836	29.374	29.2284	29.6975	30.13	30.1868		Ptgds	0.270007	0.218473	1.20581	mast cell degranulation [GO:0043303]; negative regulation of male germ cell proliferation [GO:2000255]; prostaglandin biosynthetic process [GO:0001516]; regulation of circadian sleep/wake cycle, sleep [GO:0045187]; response to glucocorticoid [GO:0051384]	extracellular region [GO:0005576]; extracellular space [GO:0005615]; Golgi apparatus [GO:0005794]; nuclear envelope [GO:0005635]; nuclear membrane [GO:0031965]; perinuclear region of cytoplasm [GO:0048471]; rough endoplasmic reticulum [GO:0005791]
P10252	Cd48	26.7056	26.9767	26.7543	26.6883	26.5549	26.8544	27.0893	26.7502	26.9122	26.7086		Cd48	0.126978	0.222788	1.092	mast cell activation [GO:0045576]; regulation of adaptive immune response [GO:0002819]; signal transduction [GO:0007165]; T cell activation [GO:0042110]	anchored component of plasma membrane [GO:0046658]; external side of plasma membrane [GO:0009897]; membrane raft [GO:0045121]; plasma membrane [GO:0005886]; protein-containing complex [GO:0032991]
P41562	Idh1	24.7849	24.3751	24.6325	25.442	24.6295	24.3646	24.1534	24.4314	22.9084	25.2496		Idh1	-0.551319	0.22384	1.46543	2-oxoglutarate metabolic process [GO:0006103]; female gonad development [GO:0008585]; glutathione metabolic process [GO:0006749]; glyoxylate cycle [GO:0006097]; isocitrate metabolic process [GO:0006102]; NADP metabolic process [GO:0006739]; regulation of phospholipid biosynthetic process [GO:0071071]; regulation of phospholipid catabolic process [GO:0060696]; response to organic cyclic compound […	cytosol [GO:0005829]; mitochondrion [GO:0005739]; peroxisome [GO:0005777]
P17475	Serpina1	30.9539	31.1754	31.3836	30.0021	30.8313	31.0052	31.2834	31.0003	31.4673	31.2137		Serpina1	0.324726	0.234388	1.25243	acute-phase response [GO:0006953]; inflammatory response [GO:0006954]; negative regulation of endopeptidase activity [GO:0010951]; negative regulation of serine-type endopeptidase activity [GO:1900004]; response to chromate [GO:0046687]; response to cytokine [GO:0034097]; response to estradiol [GO:0032355]; response to hypoxia [GO:0001666]; response to inorganic substance [GO:0010035]; response t…	endoplasmic reticulum [GO:0005783]; extracellular space [GO:0005615]; Golgi apparatus [GO:0005794]
P22282	Andpro	30.3628	28.6765	29.6587	28.1975	30.198	28.737	32.3922	30.8763	29.1651	30.839		Andpro	0.983226	0.244928	1.97688	androgen receptor signaling pathway [GO:0030521]; cellular response to dexamethasone stimulus [GO:0071549]; cellular response to testosterone stimulus [GO:0071394]; response to testosterone [GO:0033574]	cytosol [GO:0005829]; extracellular region [GO:0005576]; extracellular space [GO:0005615]; nucleus [GO:0005634]
Q63041	A1m	32.1655	31.9853	31.585	31.7521	31.9232	32.1445	32.0101	31.8082	32.616	31.9124		A1m	0.216003	0.245612	1.16151	embryo implantation [GO:0007566]	extracellular space [GO:0005615]
P47967	Lgals5	26.2265	25.6134	25.4458	25.566	25.43	25.4295	25.2565	25.1931	25.8879	25.3118		Lgals5	-0.240581	0.246256	1.18147	negative regulation of CD4-positive, alpha-beta T cell proliferation [GO:2000562]; negative regulation of interferon-gamma production [GO:0032689]; positive regulation of gene expression [GO:0010628]; positive regulation of T cell apoptotic process [GO:0070234]	cytosol [GO:0005829]; nucleus [GO:0005634]
Q6DGG1	Abhd14b	27.0334	27.6932	26.9858	26.6492	26.4935	26.3159	27.2963	26.7091	25.8657	26.714		Abhd14b	-0.390815	0.249917	1.31113	positive regulation of transcription by RNA polymerase II [GO:0045944]	cytoplasm [GO:0005737]; cytosol [GO:0005829]; nucleolus [GO:0005730]; nucleoplasm [GO:0005654]; nucleus [GO:0005634]
Q6IRK9	Cpq	30.2829	29.7122	29.4971	29.9771	29.8477	29.9698	29.7676	30.3497	30.1226	30.1151		Cpq	0.201561	0.251019	1.14994	peptide catabolic process [GO:0043171]; proteolysis [GO:0006508]; thyroid hormone generation [GO:0006590]; tissue regeneration [GO:0042246]	cytoplasm [GO:0005737]; endoplasmic reticulum [GO:0005783]; extracellular space [GO:0005615]; Golgi apparatus [GO:0005794]; lysosome [GO:0005764]
P02091	Hbb	27.8838	27.2309	29.3913	32.432	32.3062	26.796	24.8656	26.7699	32.7332	27.6837		Hbb	-2.07915	0.259362	4.22557	cellular oxidant detoxification [GO:0098869]; erythrocyte development [GO:0048821]; glutathione metabolic process [GO:0006749]; hemopoiesis [GO:0030097]; hydrogen peroxide catabolic process [GO:0042744]; nitric oxide transport [GO:0030185]; oxygen transport [GO:0015671]; positive regulation of cell death [GO:0010942]; regulation of eIF2 alpha phosphorylation by heme [GO:0010999]; renal absorption…	extracellular space [GO:0005615]; haptoglobin-hemoglobin complex [GO:0031838]; hemoglobin complex [GO:0005833]
P19218	Gp2	24.0918	25.9778	25.7707	25.8869	23.6078	25.3143	24.3746	23.9499	24.8683	22.993		Gp2	-0.766975	0.267025	1.7017	antigen transcytosis by M cells in mucosal-associated lymphoid tissue [GO:0002412]; innate immune response [GO:0045087]; neutrophil migration [GO:1990266]	anchored component of external side of plasma membrane [GO:0031362]; apical plasma membrane [GO:0016324]; cell surface [GO:0009986]; endosome [GO:0005768]; extracellular space [GO:0005615]; membrane raft [GO:0045121]; zymogen granule membrane [GO:0042589]
P30919	Aga	25.0147	24.7345	24.8784	24.4526	24.8669	24.7547	24.6125	25.3716	25.7235	24.8515		Aga	0.273291	0.268279	1.20856	protein deglycosylation [GO:0006517]	cytoplasm [GO:0005737]; endoplasmic reticulum [GO:0005783]; extracellular space [GO:0005615]; lysosome [GO:0005764]
P01015	Agt	27.2594	26.8021	27.2719	26.5571	27.2575	27.3611	27.2247	27.6433	27.7622	26.6259		Agt	0.293865	0.270219	1.22592	activation of NF-kappaB-inducing kinase activity [GO:0007250]; activation of phospholipase C activity [GO:0007202]; aging [GO:0007568]; aldosterone secretion [GO:0035932]; angiotensin-activated signaling pathway [GO:0038166]; angiotensin-mediated drinking behavior [GO:0003051]; angiotensin-mediated vasoconstriction involved in regulation of systemic arterial blood pressure [GO:0001998]; artery sm…	cytoplasm [GO:0005737]; extracellular space [GO:0005615]
P01048	Map1	28.3727	29.1219	29.1078	28.204	29.1844	29.1038	28.3687	28.6159	28.3368	27.8638		Map1	-0.340335	0.276896	1.26605	acute-phase response [GO:0006953]; negative regulation of blood coagulation [GO:0030195]; negative regulation of endopeptidase activity [GO:0010951]; positive regulation of cytosolic calcium ion concentration [GO:0007204]; vasodilation [GO:0042311]	extracellular region [GO:0005576]; extracellular space [GO:0005615]
O70244	Cubn	25.5779	25.9926	26.1941	26.2332	25.2236	26.7057	24.7448	25.8621	25.1278	23.4599		Cubn	-0.664234	0.284144	1.58473	cholesterol metabolic process [GO:0008203]; cobalamin catabolic process [GO:0042366]; cobalamin metabolic process [GO:0009235]; cobalamin transport [GO:0015889]; endocytic hemoglobin import into cell [GO:0020028]; in utero embryonic development [GO:0001701]; lipoprotein transport [GO:0042953]; receptor-mediated endocytosis [GO:0006898]; response to bacterium [GO:0009617]; response to nutrient [GO…	apical part of cell [GO:0045177]; apical plasma membrane [GO:0016324]; brush border [GO:0005903]; brush border membrane [GO:0031526]; clathrin-coated pit [GO:0005905]; coated vesicle [GO:0030135]; cytoplasm [GO:0005737]; endocytic vesicle [GO:0030139]; endocytic vesicle membrane [GO:0030666]; endoplasmic reticulum [GO:0005783]; endosome [GO:0005768]; endosome membrane [GO:0010008]; extracellular …
P10960	Psap	26.6842	26.6255	26.1645	25.8133	26.402	26.8977	26.607	26.207	26.4872	26.6024		Psap	0.222373	0.28694	1.16665	adenylate cyclase-inhibiting G protein-coupled receptor signaling pathway [GO:0007193]; antigen processing and presentation [GO:0019882]; cellular response to organic substance [GO:0071310]; ceramide metabolic process [GO:0006672]; cerebellar Purkinje cell differentiation [GO:0021702]; cochlea development [GO:0090102]; corneocyte development [GO:0003335]; cornified envelope assembly [GO:1903575];…	aggresome [GO:0016235]; cytoplasm [GO:0005737]; extracellular region [GO:0005576]; extracellular space [GO:0005615]; late endosome [GO:0005770]; lysosome [GO:0005764]
P00787	Ctsb	26.7054	27.481	26.8299	26.8029	26.5956	26.7894	26.9228	26.3264	26.7666	26.5463		Ctsb	-0.212684	0.289091	1.15884	autophagy [GO:0006914]; cellular response to mechanical stimulus [GO:0071260]; cellular response to thyroid hormone stimulus [GO:0097067]; collagen catabolic process [GO:0030574]; decidualization [GO:0046697]; epithelial cell differentiation [GO:0030855]; negative regulation of cell death [GO:0060548]; negative regulation of peptidase activity [GO:0010466]; proteolysis [GO:0006508]; proteolysis i…	apical plasma membrane [GO:0016324]; cell surface [GO:0009986]; cytoplasm [GO:0005737]; external side of plasma membrane [GO:0009897]; extracellular region [GO:0005576]; extracellular space [GO:0005615]; lysosome [GO:0005764]; melanosome [GO:0042470]; mitochondrion [GO:0005739]; peptidase inhibitor complex [GO:1904090]; perinuclear region of cytoplasm [GO:0048471]; sarcolemma [GO:0042383]
Q499T2	Ifi30	26.5455	25.6545	25.3878	25.3943	26.4792	26.3368	26.5237	26.2748	25.63	26.3795		Ifi30	0.336719	0.29576	1.26288	antigen processing and presentation of exogenous peptide antigen via MHC class I [GO:0042590]; antigen processing and presentation of exogenous peptide antigen via MHC class II [GO:0019886]; negative regulation of fibroblast proliferation [GO:0048147]; protein stabilization [GO:0050821]	cell junction [GO:0030054]; cytosol [GO:0005829]; extracellular region [GO:0005576]; lysosome [GO:0005764]
P85971	Pgls	25.7917	24.9823	25.1052	24.8164	25.2412	25.0092	24.969	24.9287	25.012	25.0925		Pgls	-0.185086	0.304538	1.13688	carbohydrate metabolic process [GO:0005975]; pentose-phosphate shunt [GO:0006098]; pentose-phosphate shunt, oxidative branch [GO:0009051]	cytoplasm [GO:0005737]
P48199	Crp	28.7129	29.2321	29.175	29.3458	29.5388	28.7548	29.1771	29.6924	28.0297	28.6591		Crp	-0.338288	0.305443	1.26426	acute-phase response [GO:0006953]; aging [GO:0007568]; cellular response to calcium ion [GO:0071277]; cellular response to interleukin-6 [GO:0071354]; cellular response to nitric oxide [GO:0071732]; complement activation, classical pathway [GO:0006958]; innate immune response [GO:0045087]; negative regulation by host of viral process [GO:0044793]; negative regulation of lipid storage [GO:0010888]…	extracellular space [GO:0005615]; filopodium [GO:0030175]; growth cone [GO:0030426]
P62986	Uba52;Rps27a;Ubb;Ubc	27.3793	27.2632	26.9657	27.242	27.3051	26.4473	27.605	26.9833	26.5876	27.3121		Uba52;Rps27a;Ubb;Ubc	-0.244007	0.315255	1.18428	modification-dependent protein catabolic process [GO:0019941]; protein ubiquitination [GO:0016567]; response to insecticide [GO:0017085]; translation [GO:0006412]	cytoplasm [GO:0005737]; cytosolic large ribosomal subunit [GO:0022625]; cytosolic ribosome [GO:0022626]; cytosolic small ribosomal subunit [GO:0022627]; nucleus [GO:0005634]; synapse [GO:0045202]
Q5XI43	Mxra8	29.2393	28.9529	28.8268	28.7986	29.172	28.8904	28.7662	28.6606	29.2032	28.7788		Mxra8	-0.138106	0.315985	1.10046	cell adhesion [GO:0007155]; establishment of glial blood-brain barrier [GO:0060857]	bicellular tight junction [GO:0005923]; cell surface [GO:0009986]; ciliary membrane [GO:0060170]; cytoplasm [GO:0005737]; integral component of membrane [GO:0016021]; nucleus [GO:0005634]
P02680-2	Fgg	22.5438	21.4239	22.8622	22.4808	21.1662	21.2058	22.6561	21.7427	26.8213	23.6075		Fgg	1.11128	0.319536	2.16038	blood coagulation, fibrin clot formation [GO:0072378]; cell-matrix adhesion [GO:0007160]; cellular response to interleukin-1 [GO:0071347]; cellular response to interleukin-6 [GO:0071354]; fibrinolysis [GO:0042730]; negative regulation of endothelial cell apoptotic process [GO:2000352]; negative regulation of extrinsic apoptotic signaling pathway via death domain receptors [GO:1902042]; negative r…	blood microparticle [GO:0072562]; cell cortex [GO:0005938]; cell surface [GO:0009986]; collagen-containing extracellular matrix [GO:0062023]; cytoplasm [GO:0005737]; external side of plasma membrane [GO:0009897]; extracellular space [GO:0005615]; fibrinogen complex [GO:0005577]; platelet alpha granule [GO:0031091]; synapse [GO:0045202]
Q5U2Q3	Q5U2Q3	25.2884	25.7929	25.8499	26.0733	25.3239	25.399	25.9725	25.5177	26.3656	26.4382		Q5U2Q3	0.272934	0.328642	1.20826		nuclear body [GO:0016604]; nucleus [GO:0005634]
P02764	Orm1	28.6215	28.9877	29.175	28.3179	28.9731	29.1526	28.3968	28.2908	28.6274	28.5265		Orm1	-0.216219	0.342227	1.16168	acute inflammatory response to antigenic stimulus [GO:0002438]; acute-phase response [GO:0006953]; animal organ regeneration [GO:0031100]; cellular response to glucocorticoid stimulus [GO:0071385]; cellular response to growth hormone stimulus [GO:0071378]; cellular response to retinoic acid [GO:0071300]; chronic inflammatory response to antigenic stimulus [GO:0002439]; negative regulation of inte…	extracellular space [GO:0005615]
P30152	Lcn2	26.2889	26.0524	26.3898	25.5261	27.2081	26.3272	26.5044	26.8202	26.2828	27.1249		Lcn2	0.31886	0.342855	1.24734	acute-phase response [GO:0006953]; cellular response to amyloid-beta [GO:1904646]; cellular response to hydrogen peroxide [GO:0070301]; cellular response to increased oxygen levels [GO:0036295]; cellular response to interleukin-1 [GO:0071347]; cellular response to interleukin-6 [GO:0071354]; cellular response to lipopolysaccharide [GO:0071222]; cellular response to nerve growth factor stimulus [G…	cytoplasm [GO:0005737]; cytoplasmic vesicle lumen [GO:0060205]; cytosol [GO:0005829]; extracellular region [GO:0005576]; extracellular space [GO:0005615]
Q63556	Serpina3m	25.0091	26.3482	25.9076	25.0975	25.452	25.8971	25.854	25.4094	26.5956	25.6683		Serpina3m	0.322023	0.343986	1.25008	negative regulation of endopeptidase activity [GO:0010951]	extracellular space [GO:0005615]
P00689	Amy2	31.9717	32.2199	31.924	31.9865	32.7906	32.0698	31.463	31.8086	32.1159	32.3498		Amy2	-0.21713	0.355153	1.16242	carbohydrate catabolic process [GO:0016052]	extracellular space [GO:0005615]
P23785	Grn	27.2424	26.9319	27.0405	26.6244	26.2577	27.21	27.0518	26.2817	26.3392	25.5324		Grn	-0.336356	0.361036	1.26256	astrocyte activation involved in immune response [GO:0002265]; blastocyst hatching [GO:0001835]; chondrocyte proliferation [GO:0035988]; embryo implantation [GO:0007566]; locomotory exploration behavior [GO:0035641]; lysosomal lumen acidification [GO:0007042]; lysosomal protein catabolic process [GO:1905146]; lysosomal transport [GO:0007041]; lysosome organization [GO:0007040]; male mating behavi…	endoplasmic reticulum [GO:0005783]; extracellular region [GO:0005576]; extracellular space [GO:0005615]; Golgi apparatus [GO:0005794]; late endosome [GO:0005770]; lysosomal membrane [GO:0005765]; lysosome [GO:0005764]; membrane [GO:0016020]; plasma membrane [GO:0005886]; presynapse [GO:0098793]; trans-Golgi network [GO:0005802]; vesicle [GO:0031982]
Q62867	Ggh	29.5775	28.8838	28.6214	28.6101	29.0479	29.0731	29.5864	28.9174	29.6341	28.7451		Ggh	0.243093	0.363208	1.18353	poly-gamma-glutamate metabolic process [GO:0070500]; response to ethanol [GO:0045471]; response to insulin [GO:0032868]; response to xenobiotic stimulus [GO:0009410]; response to zinc ion [GO:0010043]; tetrahydrofolylpolyglutamate metabolic process [GO:0046900]	cytosol [GO:0005829]; extracellular space [GO:0005615]; lysosome [GO:0005764]; melanosome [GO:0042470]; vacuole [GO:0005773]
P07314	Ggt1	29.4711	29.1957	29.5222	29.3958	29.2896	29.1053	29.4809	29.995	29.2422	29.9858		Ggt1	0.186957	0.364186	1.13836	aging [GO:0007568]; cellular amino acid metabolic process [GO:0006520]; cellular response to oxidative stress [GO:0034599]; cysteine biosynthetic process [GO:0019344]; fatty acid metabolic process [GO:0006631]; glutamate metabolic process [GO:0006536]; glutathione biosynthetic process [GO:0006750]; glutathione catabolic process [GO:0006751]; hepatoblast differentiation [GO:0061017]; hepatocyte di…	extracellular space [GO:0005615]; integral component of plasma membrane [GO:0005887]; plasma membrane [GO:0005886]; vesicle [GO:0031982]
P81827	P81827	33.3303	33.6552	32.183	31.2443	33.3974	34.0013	33.889	32.4409	33.566	32.6067		P81827	0.538738	0.364912	1.4527		extracellular region [GO:0005576]
Q03626	Mug1	27.6223	26.48	27.8759	27.3348	27.3122	27.9329	27.6362	27.2077	28.0605	27.1848		Mug1	0.279383	0.373404	1.21368	acute-phase response [GO:0006953]; embryo implantation [GO:0007566]; inflammatory response [GO:0006954]	extracellular space [GO:0005615]
P08932	P08932	29.3424	30.1044	30.3846	28.9617	29.7192	29.7682	29.2231	29.3448	29.5067	29.4427		P08932	-0.245343	0.392287	1.18537	acute-phase response [GO:0006953]; negative regulation of blood coagulation [GO:0030195]; negative regulation of endopeptidase activity [GO:0010951]; positive regulation of cytosolic calcium ion concentration [GO:0007204]; vasodilation [GO:0042311]	extracellular region [GO:0005576]; extracellular space [GO:0005615]
P02650	Apoe	28.1972	28.0265	28.1927	28.3917	28.7372	28.1189	28.1632	28.4245	28.9965	28.7869		Apoe	0.18895	0.396349	1.13993	aging [GO:0007568]; AMPA glutamate receptor clustering [GO:0097113]; amyloid precursor protein metabolic process [GO:0042982]; artery morphogenesis [GO:0048844]; cellular calcium ion homeostasis [GO:0006874]; cellular response to cholesterol [GO:0071397]; cellular response to ethanol [GO:0071361]; cellular response to growth factor stimulus [GO:0071363]; cellular response to interleukin-1 [GO:007…	cell surface [GO:0009986]; chylomicron [GO:0042627]; cytoplasm [GO:0005737]; dendrite [GO:0030425]; discoidal high-density lipoprotein particle [GO:0034365]; endoplasmic reticulum [GO:0005783]; endosome [GO:0005768]; extracellular matrix [GO:0031012]; extracellular region [GO:0005576]; extracellular space [GO:0005615]; extrinsic component of external side of plasma membrane [GO:0031232]; glutamat…
P26051-2	Cd44	27.6778	27.4607	27.4909	27.4997	26.7193	27.9393	27.2187	27.4569	23.1082	27.153		Cd44	-0.794487	0.399809	1.73446	blood vessel maturation [GO:0001955]; branching involved in prostate gland morphogenesis [GO:0060442]; branching involved in ureteric bud morphogenesis [GO:0001658]; cartilage development [GO:0051216]; cell adhesion [GO:0007155]; cell migration [GO:0016477]; cellular response to fibroblast growth factor stimulus [GO:0044344]; cytokine-mediated signaling pathway [GO:0019221]; hyaluronan catabolic …	apical plasma membrane [GO:0016324]; basolateral plasma membrane [GO:0016323]; cell projection [GO:0042995]; cell surface [GO:0009986]; external side of plasma membrane [GO:0009897]; integral component of membrane [GO:0016021]; lamellipodium membrane [GO:0031258]; macrophage migration inhibitory factor receptor complex [GO:0035692]; microvillus [GO:0005902]; nucleus [GO:0005634]; plasma membrane …
Q6Q0N1	Cndp2	24.0703	25.2407	24.7883	26.3665	24.1887	24.1404	25.1307	25.3629	26.3955	26.1935		Cndp2	0.513668	0.402046	1.42768	proteolysis [GO:0006508]	cytosol [GO:0005829]; nucleoplasm [GO:0005654]
P98158	Lrp2	30.348	30.3605	30.0022	30.5456	30.0878	30.5111	29.9704	30.017	30.1086	30.1298		Lrp2	-0.121459	0.402483	1.08783	aging [GO:0007568]; amyloid-beta clearance [GO:0097242]; animal organ regeneration [GO:0031100]; aorta development [GO:0035904]; cell population proliferation [GO:0008283]; cellular response to growth factor stimulus [GO:0071363]; chemoattraction of axon [GO:0061642]; coronary artery morphogenesis [GO:0060982]; coronary vasculature development [GO:0060976]; endocytic hemoglobin import into cell […	apical part of cell [GO:0045177]; apical plasma membrane [GO:0016324]; axon [GO:0030424]; axonal growth cone [GO:0044295]; brush border [GO:0005903]; brush border membrane [GO:0031526]; cell surface [GO:0009986]; clathrin-coated pit [GO:0005905]; cytoplasm [GO:0005737]; dendrite [GO:0030425]; endocytic vesicle [GO:0030139]; endoplasmic reticulum [GO:0005783]; endosome [GO:0005768]; endosome lumen…
P05371	Clu	26.7405	26.5433	26.4667	26.6195	26.4098	26.4537	26.9711	26.2496	26.9482	26.8375		Clu	0.136067	0.407618	1.0989	aging [GO:0007568]; cell morphogenesis [GO:0000902]; cellular response to growth factor stimulus [GO:0071363]; central nervous system myelin maintenance [GO:0032286]; chaperone-mediated protein complex assembly [GO:0051131]; chaperone-mediated protein folding [GO:0061077]; endocrine pancreas development [GO:0031018]; estrous cycle [GO:0044849]; immune complex clearance [GO:0002434]; intrinsic apo…	aggresome [GO:0016235]; apical dendrite [GO:0097440]; cell surface [GO:0009986]; chromaffin granule [GO:0042583]; cytoplasm [GO:0005737]; cytosol [GO:0005829]; extracellular space [GO:0005615]; growth cone [GO:0030426]; intracellular membrane-bounded organelle [GO:0043231]; mitochondrial inner membrane [GO:0005743]; mitochondrion [GO:0005739]; neurofibrillary tangle [GO:0097418]; neuron projectio…
Q66H12	Naga	25.3045	24.4389	24.7818	24.0205	24.1548	24.3797	25.277	25.5283	25.626	23.7622		Naga	0.374564	0.409178	1.29645	carbohydrate catabolic process [GO:0016052]; glycolipid catabolic process [GO:0019377]; glycoside catabolic process [GO:0016139]; glycosylceramide catabolic process [GO:0046477]; oligosaccharide metabolic process [GO:0009311]	cytoplasm [GO:0005737]; lysosome [GO:0005764]
P08723	Sbp	28.9697	30.8312	29.6108	28.6672	30.0687	30.9679	30.9764	33.0742	27.4059	29.9541		Sbp	0.846165	0.421368	1.79772		extracellular space [GO:0005615]
Q9WTQ2	Podxl	24.7692	24.8548	24.9135	25.0945	24.7585	25.2036	24.1427	24.3713	25.4039	24.0607		Podxl	-0.241649	0.422021	1.18234	cell adhesion [GO:0007155]; cell migration [GO:0016477]; epithelial tube formation [GO:0072175]; glomerular filtration [GO:0003094]; glomerular visceral epithelial cell development [GO:0072015]; leukocyte migration [GO:0050900]; negative regulation of cell adhesion [GO:0007162]; negative regulation of cell-cell adhesion [GO:0022408]; positive regulation of cell-cell adhesion mediated by integrin …	apical plasma membrane [GO:0016324]; cell body [GO:0044297]; cytoplasm [GO:0005737]; extracellular exosome [GO:0070062]; filopodium [GO:0030175]; integral component of membrane [GO:0016021]; lamellipodium [GO:0030027]; membrane raft [GO:0045121]; microvillus membrane [GO:0031528]; plasma membrane [GO:0005886]; ruffle [GO:0001726]; slit diaphragm [GO:0036057]
P32038	Cfd	26.405	26.7252	27.0945	26.57	25.797	26.8022	25.8977	25.5579	26.8318	26.148		Cfd	-0.270842	0.434498	1.20651	complement activation, alternative pathway [GO:0006957]; Notch signaling pathway [GO:0007219]; response to bacterium [GO:0009617]; retina development in camera-type eye [GO:0060041]; vascular associated smooth muscle cell differentiation [GO:0035886]	extracellular space [GO:0005615]
P80067	Ctsc	26.254	26.6626	25.7395	25.3548	25.2195	26.7556	25.9321	24.6696	25.1493	24.8142		Ctsc	-0.381917	0.444884	1.30307	aging [GO:0007568]; negative regulation of myelination [GO:0031642]; positive regulation of apoptotic signaling pathway [GO:2001235]; positive regulation of microglial cell activation [GO:1903980]; positive regulation of proteolysis involved in cellular protein catabolic process [GO:1903052]; proteolysis [GO:0006508]; proteolysis involved in cellular protein catabolic process [GO:0051603]; respon…	centrosome [GO:0005813]; cytoplasm [GO:0005737]; endoplasmic reticulum [GO:0005783]; extracellular space [GO:0005615]; Golgi apparatus [GO:0005794]; lysosome [GO:0005764]; nucleoplasm [GO:0005654]
P02761	P02761	36.7974	36.9061	36.3942	36.0822	37.1573	36.7677	36.6807	36.6699	36.8574	37.2044		P02761	0.168574	0.455358	1.12395	aerobic respiration [GO:0009060]; cellular response to lipid [GO:0071396]; energy reserve metabolic process [GO:0006112]; glucose homeostasis [GO:0042593]; heat generation [GO:0031649]; locomotor rhythm [GO:0045475]; mitochondrion morphogenesis [GO:0070584]; negative regulation of gluconeogenesis [GO:0045721]; negative regulation of insulin secretion involved in cellular response to glucose stimu…	cytosol [GO:0005829]; extracellular space [GO:0005615]; nucleus [GO:0005634]
P09034	Ass1	23.0106	23.7619	24.2502	26.398	23.4929	22.9276	23.4343	23.0508	24.6605	24.1911		Ass1	-0.529868	0.456682	1.4438	acute-phase response [GO:0006953]; aging [GO:0007568]; arginine biosynthetic process [GO:0006526]; argininosuccinate metabolic process [GO:0000053]; aspartate metabolic process [GO:0006531]; cellular response to amine stimulus [GO:0071418]; cellular response to amino acid stimulus [GO:0071230]; cellular response to ammonium ion [GO:0071242]; cellular response to cAMP [GO:0071320]; cellular respon…	cell body fiber [GO:0070852]; cytoplasm [GO:0005737]; cytosol [GO:0005829]; endoplasmic reticulum [GO:0005783]; lysosome [GO:0005764]; mitochondrial outer membrane [GO:0005741]; mitochondrion [GO:0005739]; neuronal cell body [GO:0043025]; neuron projection [GO:0043005]; nucleoplasm [GO:0005654]; nucleus [GO:0005634]; perikaryon [GO:0043204]
P02625	Pvalb	26.3921	27.381	25.9975	25.7787	27.1552	26.8569	26.0413	26.1628	26.1425	26.1604		Pvalb	-0.268165	0.462728	1.20427	cochlea development [GO:0090102]; excitatory chemical synaptic transmission [GO:0098976]; gene expression [GO:0010467]; inhibitory chemical synaptic transmission [GO:0098977]	axon [GO:0030424]; cuticular plate [GO:0032437]; cytoplasm [GO:0005737]; neuronal cell body [GO:0043025]; nucleus [GO:0005634]; protein-containing complex [GO:0032991]; stereocilium [GO:0032420]; terminal bouton [GO:0043195]
P15083	Pigr	28.6088	28.7927	27.9685	28.435	28.3187	28.9356	28.3611	29.4781	28.2091	28.2315		Pigr	0.218341	0.463539	1.16339	detection of chemical stimulus involved in sensory perception of bitter taste [GO:0001580]; epidermal growth factor receptor signaling pathway [GO:0007173]; Fc receptor signaling pathway [GO:0038093]; immunoglobulin transcytosis in epithelial cells mediated by polymeric immunoglobulin receptor [GO:0002415]; receptor clustering [GO:0043113]	extracellular space [GO:0005615]; integral component of membrane [GO:0016021]; plasma membrane [GO:0005886]; receptor complex [GO:0043235]; recycling endosome membrane [GO:0055038]; secretory IgA immunoglobulin complex [GO:0071751]; transport vesicle [GO:0030133]
Q920A6	Scpep1	28.4269	26.503	26.4474	26.6769	26.5257	27.4436	26.9199	27.1718	27.9018	26.7617		Scpep1	0.323756	0.473057	1.25158	blood vessel diameter maintenance [GO:0097746]; negative regulation of blood pressure [GO:0045776]; retinoic acid metabolic process [GO:0042573]	cytosol [GO:0005829]; extracellular region [GO:0005576]
Q62930	C9	25.3088	26.1634	26.619	25.9967	25.9973	25.918	26.1212	25.7885	26.746	26.563		C9	0.210292	0.474068	1.15692	blood coagulation [GO:0007596]; cell killing [GO:0001906]; complement activation, alternative pathway [GO:0006957]; complement activation, classical pathway [GO:0006958]; cytolysis [GO:0019835]; protein homooligomerization [GO:0051260]	extracellular space [GO:0005615]; membrane attack complex [GO:0005579]; plasma membrane [GO:0005886]
P07861	Mme	28.2743	28.5365	28.4313	28.2065	28.5149	28.5639	30.0373	27.8303	27.857	29.2735		Mme	0.319708	0.47786	1.24808	aging [GO:0007568]; amyloid-beta clearance [GO:0097242]; amyloid-beta clearance by cellular catabolic process [GO:0150094]; amyloid-beta metabolic process [GO:0050435]; cellular response to cytokine stimulus [GO:0071345]; cellular response to UV-A [GO:0071492]; cellular response to UV-B [GO:0071493]; creatinine metabolic process [GO:0046449]; kidney development [GO:0001822]; learning or memory [G…	axon [GO:0030424]; brush border [GO:0005903]; cytoplasm [GO:0005737]; cytoplasmic vesicle [GO:0031410]; dendrite [GO:0030425]; early endosome [GO:0005769]; integral component of membrane [GO:0016021]; membrane [GO:0016020]; membrane raft [GO:0045121]; neuronal cell body [GO:0043025]; neuron projection terminus [GO:0044306]; plasma membrane [GO:0005886]; presynapse [GO:0098793]; synapse [GO:004520…
Q63691	Cd14	25.5695	25.2441	25.9776	26.3016	26.0591	26.564	26.6023	26.1418	24.8496	26.3915		Cd14	0.279458	0.478423	1.21374	cellular response to diacyl bacterial lipopeptide [GO:0071726]; cellular response to lipopolysaccharide [GO:0071222]; cellular response to lipoteichoic acid [GO:0071223]; cellular response to molecule of bacterial origin [GO:0071219]; cellular response to triacyl bacterial lipopeptide [GO:0071727]; inflammatory response [GO:0006954]; innate immune response [GO:0045087]; lipopolysaccharide-mediate…	anchored component of external side of plasma membrane [GO:0031362]; cell surface [GO:0009986]; external side of plasma membrane [GO:0009897]; extracellular space [GO:0005615]; Golgi apparatus [GO:0005794]; lipopolysaccharide receptor complex [GO:0046696]; membrane raft [GO:0045121]; plasma membrane [GO:0005886]
Q6LED0	Q6LED0	25.9203	25.4963	25.7265	25.5029	26.5517	25.1685	25.952	25.5365	26.8365	27.3912		Q6LED0	0.337436	0.479747	1.26351		nucleoplasm [GO:0005654]; nucleosome [GO:0000786]
P26644	Apoh	25.7447	24.4425	25.9478	25.9671	24.887	25.598	25.4564	25.3789	26.9037	25.2533		Apoh	0.320266	0.480105	1.24856	aging [GO:0007568]; animal organ regeneration [GO:0031100]; blood coagulation [GO:0007596]; blood coagulation, intrinsic pathway [GO:0007597]; negative regulation of angiogenesis [GO:0016525]; negative regulation of blood coagulation [GO:0030195]; negative regulation of endothelial cell migration [GO:0010596]; negative regulation of endothelial cell proliferation [GO:0001937]; negative regulation…	cell surface [GO:0009986]; chylomicron [GO:0042627]; cytoplasm [GO:0005737]; extracellular space [GO:0005615]; high-density lipoprotein particle [GO:0034364]; plasma membrane [GO:0005886]; very-low-density lipoprotein particle [GO:0034361]
P07150	Anxa1	24.115	24.627	23.2218	24.3824	25.3418	24.0917	26.3763	23.9111	23.2757	26.8664		Anxa1	0.566641	0.497317	1.48107	actin cytoskeleton reorganization [GO:0031532]; adaptive immune response [GO:0002250]; alpha-beta T cell differentiation [GO:0046632]; arachidonic acid secretion [GO:0050482]; cell surface receptor signaling pathway [GO:0007166]; cellular response to glucocorticoid stimulus [GO:0071385]; cellular response to hydrogen peroxide [GO:0070301]; cellular response to vascular endothelial growth factor s…	apical plasma membrane [GO:0016324]; basolateral plasma membrane [GO:0016323]; cell surface [GO:0009986]; cornified envelope [GO:0001533]; cytoplasm [GO:0005737]; early endosome membrane [GO:0031901]; endosome [GO:0005768]; extracellular exosome [GO:0070062]; extracellular space [GO:0005615]; extrinsic component of endosome membrane [GO:0031313]; extrinsic component of external side of plasma mem…
P81828	P81828	33.0785	33.4265	32.3094	31.6754	33.2219	33.0056	33.0741	32.8094	33.1098	32.8807		P81828	0.233562	0.501489	1.17573		extracellular region [GO:0005576]
P38918	Akr7a3	26.1246	25.2117	25.0428	26.1782	24.2972	25.3943	25.6552	25.4592	25.7968	25.8314		Akr7a3	0.256512	0.501736	1.19459	aflatoxin catabolic process [GO:0046223]; aflatoxin metabolic process [GO:0046222]	cytoplasm [GO:0005737]; cytosol [GO:0005829]; Golgi apparatus [GO:0005794]
P02770	Alb	35.1943	35.7354	35.93	35.0418	35.3505	35.7568	35.4877	35.6401	36.1417	35.0705		Alb	0.168929	0.503714	1.12422	cellular response to starvation [GO:0009267]; maintenance of mitochondrion location [GO:0051659]; negative regulation of apoptotic process [GO:0043066]; positive regulation of circadian sleep/wake cycle, non-REM sleep [GO:0046010]; response to mercury ion [GO:0046689]; response to nutrient [GO:0007584]; response to organic substance [GO:0010033]; response to platinum ion [GO:0070541]; vasodilatio…	basement membrane [GO:0005604]; cytoplasm [GO:0005737]; extracellular exosome [GO:0070062]; extracellular region [GO:0005576]; extracellular space [GO:0005615]; protein-containing complex [GO:0032991]
Q00657	Cspg4	28.568	28.0921	27.7846	28.4326	28.168	28.0524	28.0691	28.1219	28.3985	27.8379		Cspg4	-0.113087	0.509152	1.08154	angiogenesis [GO:0001525]; cell population proliferation [GO:0008283]; glial cell migration [GO:0008347]; inflammatory response [GO:0006954]; intracellular signal transduction [GO:0035556]; negative regulation of neuron projection development [GO:0010977]; neuron remodeling [GO:0016322]; platelet-derived growth factor receptor signaling pathway [GO:0048008]; positive regulation of MAPK cascade [G…	apical plasma membrane [GO:0016324]; cell projection [GO:0042995]; cell surface [GO:0009986]; integral component of plasma membrane [GO:0005887]; lamellipodium membrane [GO:0031258]; plasma membrane [GO:0005886]; ruffle [GO:0001726]
Q9WTW7	Slc23a1	25.076	25.6083	26.1544	25.8132	25.0885	25.7326	25.6519	24.708	25.2731	25.4538		Slc23a1	-0.184182	0.525642	1.13617	brain development [GO:0007420]; dehydroascorbic acid transport [GO:0070837]; L-ascorbic acid transmembrane transport [GO:0015882]; lung development [GO:0030324]; response to toxic substance [GO:0009636]; sodium ion transport [GO:0006814]; transepithelial L-ascorbic acid transport [GO:0070904]	apical plasma membrane [GO:0016324]; basal plasma membrane [GO:0009925]; brush border [GO:0005903]; cytoplasm [GO:0005737]; integral component of plasma membrane [GO:0005887]; intracellular organelle [GO:0043229]; plasma membrane [GO:0005886]
P14046	A1i3	30.7038	31.1561	31.1333	30.2803	30.7169	31.5415	30.3952	29.7808	31.2284	29.7452		A1i3	-0.259846	0.536014	1.19735		extracellular space [GO:0005615]
P48500	Tpi1	24.748	25.0941	24.3515	26.3667	24.6516	24.8688	24.4367	24.7402	25.2876	24.676		Tpi1	-0.240542	0.542932	1.18144	carbohydrate metabolic process [GO:0005975]; gluconeogenesis [GO:0006094]; glucose metabolic process [GO:0006006]; glyceraldehyde-3-phosphate biosynthetic process [GO:0046166]; glyceraldehyde-3-phosphate metabolic process [GO:0019682]; glycerol catabolic process [GO:0019563]; glycolytic process [GO:0006096]; methylglyoxal biosynthetic process [GO:0019242]	cytosol [GO:0005829]; nucleus [GO:0005634]
P20611	Acp2	26.1634	25.4121	24.9679	25.3153	25.028	25.6629	26.4079	24.9216	25.8054	25.156		Acp2	0.213424	0.543963	1.15944	autophagic cell death [GO:0048102]; chemical synaptic transmission [GO:0007268]; dephosphorylation [GO:0016311]; lysosome organization [GO:0007040]; response to organic substance [GO:0010033]; skeletal system development [GO:0001501]	cytoplasmic vesicle [GO:0031410]; integral component of membrane [GO:0016021]; lysosomal lumen [GO:0043202]; lysosomal membrane [GO:0005765]; lysosome [GO:0005764]; neuron projection [GO:0043005]; synapse [GO:0045202]
P01026	C3	28.8046	27.9771	28.9702	28.2716	28.4014	28.0379	28.3715	28.0036	30.2442	29.2027		C3	0.287006	0.55273	1.22011	amyloid-beta clearance [GO:0097242]; blood coagulation [GO:0007596]; cell surface receptor signaling pathway involved in cell-cell signaling [GO:1905114]; chemotaxis [GO:0006935]; complement activation [GO:0006956]; complement activation, alternative pathway [GO:0006957]; complement activation, classical pathway [GO:0006958]; complement-dependent cytotoxicity [GO:0097278]; complement-mediated syn…	cell surface [GO:0009986]; extracellular region [GO:0005576]; extracellular space [GO:0005615]; protein-containing complex [GO:0032991]
Q6AYD4	Esam	27.5311	26.0421	25.3793	25.8404	25.5912	26.7033	26.1979	25.5864	26.7908	26.4577		Esam	0.270426	0.553846	1.20616	bicellular tight junction assembly [GO:0070830]; cell-cell adhesion [GO:0098609]; cellular protein localization [GO:0034613]; homophilic cell adhesion via plasma membrane adhesion molecules [GO:0007156]; regulation of actin cytoskeleton reorganization [GO:2000249]; regulation of actin filament polymerization [GO:0030833]	adherens junction [GO:0005912]; bicellular tight junction [GO:0005923]; cell-cell junction [GO:0005911]; integral component of membrane [GO:0016021]; plasma membrane [GO:0005886]; protein-containing complex [GO:0032991]
P20761	Igh-1a	25.127	26.1616	26.266	25.231	25.7116	25.8082	25.0435	26.0179	26.6771	26.0334		Igh-1a	0.216586	0.553887	1.16198	B cell receptor signaling pathway [GO:0050853]; complement activation, classical pathway [GO:0006958]; defense response to bacterium [GO:0042742]; innate immune response [GO:0045087]; phagocytosis, engulfment [GO:0006911]; phagocytosis, recognition [GO:0006910]; positive regulation of B cell activation [GO:0050871]	external side of plasma membrane [GO:0009897]; immunoglobulin complex, circulating [GO:0042571]
P19804	Nme2;Nme1	24.8186	25.3468	25.0881	24.9022	25.5062	24.718	25.587	24.9796	24.571	25.1331		Nme2;Nme1	-0.134647	0.556985	1.09782	adenylate cyclase-activating G protein-coupled receptor signaling pathway [GO:0007189]; cellular response to fatty acid [GO:0071398]; cellular response to glucose stimulus [GO:0071333]; cellular response to oxidative stress [GO:0034599]; CTP biosynthetic process [GO:0006241]; GTP biosynthetic process [GO:0006183]; integrin-mediated signaling pathway [GO:0007229]; negative regulation of apoptotic …	cell periphery [GO:0071944]; cytoplasm [GO:0005737]; lamellipodium [GO:0030027]; mitochondrial membrane [GO:0031966]; nucleus [GO:0005634]; perinuclear region of cytoplasm [GO:0048471]; ruffle [GO:0001726]
P31211	Serpina6	27.2052	27.833	27.1	26.5007	26.8105	27.8847	26.7282	26.6331	27.191	25.7434		Serpina6	-0.253791	0.558861	1.19234	glucocorticoid metabolic process [GO:0008211]; negative regulation of endopeptidase activity [GO:0010951]	extracellular space [GO:0005615]
P13635	Cp	28.0842	28.5193	28.9938	27.974	28.6479	28.7508	28.4082	28.0879	29.2861	28.4977		Cp	0.162316	0.570089	1.11908	aging [GO:0007568]; cellular iron ion homeostasis [GO:0006879]; female pregnancy [GO:0007565]; iron ion homeostasis [GO:0055072]; iron ion transport [GO:0006826]; lactation [GO:0007595]; liver development [GO:0001889]; lung development [GO:0030324]; mammary gland involution [GO:0060056]; plasma membrane copper ion transport [GO:0015679]; response to copper ion [GO:0046688]; response to nutrient […	anchored component of plasma membrane [GO:0046658]; extracellular space [GO:0005615]; plasma membrane [GO:0005886]
P04797	Gapdh	26.023	26.1296	25.9702	27.0703	25.1777	26.284	25.6793	25.3598	26.0398	26.0155		Gapdh	-0.198465	0.576963	1.14748	antimicrobial humoral immune response mediated by antimicrobial peptide [GO:0061844]; apoptotic process [GO:0006915]; cAMP-mediated signaling [GO:0019933]; carbohydrate metabolic process [GO:0005975]; cellular response to interferon-gamma [GO:0071346]; defense response to fungus [GO:0050832]; female pregnancy [GO:0007565]; gluconeogenesis [GO:0006094]; glycolytic process [GO:0006096]; killing by …	cytoplasm [GO:0005737]; cytosol [GO:0005829]; GAIT complex [GO:0097452]; glutamatergic synapse [GO:0098978]; lipid droplet [GO:0005811]; microtubule cytoskeleton [GO:0015630]; nucleus [GO:0005634]; plasma membrane [GO:0005886]; postsynaptic density, intracellular component [GO:0099092]; ribonucleoprotein complex [GO:1990904]
Q6P7S1	Asah1	24.5983	24.3795	23.1882	23.8721	23.7301	24.605	23.8569	23.9732	22.4594	23.6358		Asah1	-0.247589	0.58073	1.18722	cellular response to tumor necrosis factor [GO:0071356]; ceramide biosynthetic process [GO:0046513]; ceramide catabolic process [GO:0046514]; fatty acid metabolic process [GO:0006631]; keratinocyte differentiation [GO:0030216]; lung development [GO:0030324]; regulation of programmed necrotic cell death [GO:0062098]; regulation of steroid biosynthetic process [GO:0050810]; response to organic subs…	extracellular space [GO:0005615]; lysosome [GO:0005764]; nucleus [GO:0005634]
P08649	C4	26.3387	25.861	26.3789	26.9944	26.1602	26.2976	25.7853	26.0745	26.5881	26.3326		C4	-0.131034	0.58409	1.09508	complement activation [GO:0006956]; complement activation, classical pathway [GO:0006958]; inflammatory response [GO:0006954]; innate immune response [GO:0045087]; positive regulation of apoptotic cell clearance [GO:2000427]	axon [GO:0030424]; dendrite [GO:0030425]; extracellular region [GO:0005576]; extracellular space [GO:0005615]; neuronal cell body [GO:0043025]; synapse [GO:0045202]
P04904	Gsta3;Gsta5	26.5483	26.9811	27.1308	28.3804	26.7099	26.8992	27.4615	27.4511	27.3815	27.5168		Gsta3;Gsta5	0.191924	0.591104	1.14229	aging [GO:0007568]; epithelial cell differentiation [GO:0030855]; glutathione derivative biosynthetic process [GO:1901687]; glutathione metabolic process [GO:0006749]; linoleic acid metabolic process [GO:0043651]; prostaglandin metabolic process [GO:0006693]; response to nutrient levels [GO:0031667]; response to xenobiotic stimulus [GO:0009410]; xenobiotic catabolic process [GO:0042178]; xenobiot…	cytosol [GO:0005829]; organelle membrane [GO:0031090]
P36374	Klk6	27.6139	24.7099	26.4661	25.6511	27.4744	23.7943	29.9373	27.8275	25.4113	28.3663		Klk6	0.684246	0.5917	1.60686	regulation of systemic arterial blood pressure [GO:0003073]; zymogen activation [GO:0031638]	secretory granule [GO:0030141]
Q9JIK1-2	Cdhr5	26.5438	26.7249	26.0146	27.4169	26.3311	26.3224	26.4693	26.8295	26.6068	26.0697		Cdhr5	-0.146726	0.598221	1.10705	cell adhesion [GO:0007155]; cell differentiation [GO:0030154]; homophilic cell adhesion via plasma membrane adhesion molecules [GO:0007156]; intermicrovillar adhesion [GO:0090675]; regulation of microvillus length [GO:0032532]	apical plasma membrane [GO:0016324]; brush border membrane [GO:0031526]; clathrin-coated pit [GO:0005905]; integral component of membrane [GO:0016021]; integral component of plasma membrane [GO:0005887]; microvillus membrane [GO:0031528]; spanning component of plasma membrane [GO:0044214]
P18757	Cth	23.2063	24.4869	23.7182	25.6523	24.1037	22.8478	24.5886	23.8006	23.8079	24.7042		Cth	-0.283655	0.608026	1.21727	cellular response to leukemia inhibitory factor [GO:1990830]; cysteine biosynthetic process [GO:0019344]; cysteine biosynthetic process via cystathionine [GO:0019343]; glutathione metabolic process [GO:0006749]; homocysteine metabolic process [GO:0050667]; hydrogen sulfide biosynthetic process [GO:0070814]; lipid metabolic process [GO:0006629]; negative regulation of apoptotic process [GO:0043066…	cytoplasm [GO:0005737]; cytosol [GO:0005829]
P83121	P83121	32.108	31.5147	29.902	28.9402	31.0743	32.0118	31.3067	30.7405	30.7254	30.4138		P83121	0.331805	0.616571	1.25859		extracellular region [GO:0005576]
O70417	Pip	28.0831	27.5368	27.25	27.1439	27.8199	27.6286	27.8013	27.4604	27.6057	27.8214		Pip	0.0967489	0.619155	1.06936	detection of chemical stimulus involved in sensory perception of bitter taste [GO:0001580]; negative regulation of T cell apoptotic process [GO:0070233]; positive regulation of gene expression [GO:0010628]; proteolysis [GO:0006508]; regulation of immune system process [GO:0002682]	apical plasma membrane [GO:0016324]; extracellular region [GO:0005576]; extracellular space [GO:0005615]; nucleus [GO:0005634]
Q00715	Q00715	24.5631	23.0916	23.5191	23.4507	22.5776	24.4431	22.6118	23.1368	25.2083	23.2328		Q00715	0.286133	0.633736	1.21937	defense response to bacterium [GO:0042742]; nucleosome assembly [GO:0006334]	nucleoplasm [GO:0005654]; nucleosome [GO:0000786]
P50123	Enpep	28.2422	28.434	28.3627	28.5145	27.818	28.394	28.6047	27.6841	28.7484	28.4867		Enpep	0.109311	0.635084	1.07871	angiogenesis [GO:0001525]; cell migration [GO:0016477]; cell population proliferation [GO:0008283]; glomerulus development [GO:0032835]; peptide catabolic process [GO:0043171]; proteolysis [GO:0006508]; regulation of blood pressure [GO:0008217]; regulation of systemic arterial blood pressure by renin-angiotensin [GO:0003081]; signal transduction [GO:0007165]	apical part of cell [GO:0045177]; apical plasma membrane [GO:0016324]; brush border [GO:0005903]; brush border membrane [GO:0031526]; cytoplasm [GO:0005737]; cytoplasmic vesicle [GO:0031410]; external side of plasma membrane [GO:0009897]; integral component of membrane [GO:0016021]; plasma membrane [GO:0005886]
Q6P7A9	Gaa	26.3514	25.1025	26.1955	24.2942	24.8469	25.848	26.5536	25.1422	25.499	24.9506		Gaa	0.240547	0.635165	1.18144	cardiac muscle contraction [GO:0060048]; diaphragm contraction [GO:0002086]; glycogen catabolic process [GO:0005980]; glycogen metabolic process [GO:0005977]; heart morphogenesis [GO:0003007]; locomotory behavior [GO:0007626]; lysosome organization [GO:0007040]; muscle cell cellular homeostasis [GO:0046716]; neuromuscular process controlling balance [GO:0050885]; neuromuscular process controlling…	lysosomal membrane [GO:0005765]; lysosome [GO:0005764]; membrane [GO:0016020]
P02780	Scgb2a2	30.9188	30.6259	30.6756	30.2083	31.189	30.9396	32.2721	30.7353	29.4396	31.3777		Scgb2a2	0.229366	0.65182	1.17232	androgen receptor signaling pathway [GO:0030521]	extracellular space [GO:0005615]
P27274	Cd59	28.7461	29.3531	28.564	28.5023	28.8784	29.2398	29.0054	28.5691	28.8508	27.7142		Cd59	-0.132911	0.673854	1.0965	negative regulation of activation of membrane attack complex [GO:0001971]; negative regulation of apoptotic process [GO:0043066]; negative regulation of complement activation [GO:0045916]; negative regulation of complement-dependent cytotoxicity [GO:1903660]; positive regulation of T cell proliferation [GO:0042102]; regulation of complement activation [GO:0030449]; regulation of complement-depend…	anchored component of external side of plasma membrane [GO:0031362]; cell surface [GO:0009986]; compact myelin [GO:0043218]; extracellular space [GO:0005615]; plasma membrane [GO:0005886]; sarcolemma [GO:0042383]
P82450	Siae	25.6807	25.0717	24.7814	24.8724	24.662	25.1508	25.6041	25.3414	24.9759	24.5425		Siae	0.109294	0.677648	1.0787	carbohydrate metabolic process [GO:0005975]; regulation of immune system process [GO:0002682]	lysosome [GO:0005764]
Q9JJ40	Pdzk1	27.1132	29.2589	28.7491	29.3259	28.1392	28.1005	28.3722	27.6389	28.7723	28.7172		Pdzk1	-0.197029	0.680317	1.14634	carnitine transport [GO:0015879]; cholesterol transport [GO:0030301]; intracellular transport [GO:0046907]; in utero embryonic development [GO:0001701]; positive regulation of cation transmembrane transport [GO:1904064]; positive regulation of ion transmembrane transporter activity [GO:0032414]; positive regulation of protein localization to membrane [GO:1905477]; positive regulation of protein t…	apical plasma membrane [GO:0016324]; brush border [GO:0005903]; brush border membrane [GO:0031526]; membrane raft [GO:0045121]; microvillus membrane [GO:0031528]; plasma membrane [GO:0005886]
P50137	Tkt	22.7888	21.6702	22.8618	23.7401	22.4557	22.7031	22.8278	22.5518	22.7555	23.4303		Tkt	0.150391	0.692643	1.10987	glyceraldehyde-3-phosphate biosynthetic process [GO:0046166]; pentose-phosphate shunt [GO:0006098]; pentose-phosphate shunt, non-oxidative branch [GO:0009052]; regulation of growth [GO:0040008]; ribose phosphate biosynthetic process [GO:0046390]	endoplasmic reticulum membrane [GO:0005789]; intracellular membrane-bounded organelle [GO:0043231]; peroxisome [GO:0005777]
Q99J86-2	Atrn	25.103	24.0859	24.1704	25.1629	24.3338	25.8353	24.9592	23.7575	24.7227	24.3522		Atrn	0.154151	0.720087	1.11277	animal organ morphogenesis [GO:0009887]; cell migration [GO:0016477]; cerebellum development [GO:0021549]; inflammatory response [GO:0006954]; myelination [GO:0042552]; pigmentation [GO:0043473]; regulation of multicellular organism growth [GO:0040014]; response to oxidative stress [GO:0006979]; substrate adhesion-dependent cell spreading [GO:0034446]; tissue development [GO:0009888]	basement membrane [GO:0005604]; cytoplasm [GO:0005737]; extracellular space [GO:0005615]; integral component of membrane [GO:0016021]; plasma membrane [GO:0005886]
P29598	Plau	29.4984	28.7078	28.8708	29.2324	28.516	28.9979	28.9881	29.0171	29.3108	28.8665		Plau	0.0709663	0.721921	1.05042	angiogenesis [GO:0001525]; cellular response to fluid shear stress [GO:0071498]; cellular response to glucose stimulus [GO:0071333]; cellular response to hepatocyte growth factor stimulus [GO:0035729]; cellular response to hypoxia [GO:0071456]; cellular response to lipopolysaccharide [GO:0071222]; cellular response to organic substance [GO:0071310]; cellular response to staurosporine [GO:0072734]…	cell surface [GO:0009986]; extracellular space [GO:0005615]; membrane [GO:0016020]; protein complex involved in cell-matrix adhesion [GO:0098637]; serine protease inhibitor complex [GO:0097180]; serine-type endopeptidase complex [GO:1905370]
Q6IUU3-2	Qsox1	27.9374	26.8948	27.2164	27.8318	28.2233	27.2097	28.0085	28.5127	27.525	27.4657		Qsox1	0.123575	0.723291	1.08943	extracellular matrix assembly [GO:0085029]; negative regulation of macroautophagy [GO:0016242]; protein folding [GO:0006457]	extracellular exosome [GO:0070062]; extracellular space [GO:0005615]; Golgi membrane [GO:0000139]; integral component of Golgi membrane [GO:0030173]; intercellular bridge [GO:0045171]
P16617	Pgk1	24.333	24.8424	24.6976	25.8281	24.7674	24.3068	24.4631	24.7961	25.6156	26.0382		Pgk1	0.150227	0.72888	1.10974	carbohydrate metabolic process [GO:0005975]; cellular response to hypoxia [GO:0071456]; epithelial cell differentiation [GO:0030855]; gluconeogenesis [GO:0006094]; glycolytic process [GO:0006096]; negative regulation of angiogenesis [GO:0016525]; phosphorylation [GO:0016310]; plasminogen activation [GO:0031639]	cytosol [GO:0005829]; extracellular space [GO:0005615]; membrane raft [GO:0045121]
P20059	Hpx	30.9408	31.0939	30.8884	30.2744	30.1241	31.0577	30.7529	30.5649	31.0578	30.3197		Hpx	0.086272	0.729867	1.06162	cellular iron ion homeostasis [GO:0006879]; heme metabolic process [GO:0042168]; hemoglobin metabolic process [GO:0020027]; positive regulation of humoral immune response mediated by circulating immunoglobulin [GO:0002925]; positive regulation of immunoglobulin production [GO:0002639]; positive regulation of interferon-gamma-mediated signaling pathway [GO:0060335]; positive regulation of response…	extracellular space [GO:0005615]
P52759	Hrsp12	26.5868	27.1594	26.3389	27.5353	26.9844	26.9274	27.2239	26.651	26.9308	27.2893		Hrsp12	0.0835194	0.737083	1.0596	brain development [GO:0007420]; G1 to G0 transition [GO:0070314]; kidney development [GO:0001822]; lipid metabolic process [GO:0006629]; lung development [GO:0030324]; mRNA catabolic process [GO:0006402]; mRNA destabilization [GO:0061157]; negative regulation of epithelial cell proliferation [GO:0050680]; negative regulation of translation [GO:0017148]; organonitrogen compound catabolic process […	cytoplasm [GO:0005737]; cytosol [GO:0005829]; mitochondrial matrix [GO:0005759]; mitochondrion [GO:0005739]; nucleus [GO:0005634]; peroxisome [GO:0005777]
Q6MG71	Slc44a4	26.4381	25.4043	25.3351	27.2214	24.7571	26.5517	26.6337	25.4116	23.6468	25.7042		Slc44a4	-0.24161	0.737823	1.18231	acetylcholine biosynthetic process [GO:0008292]; acetylcholine secretion [GO:0061526]; choline transport [GO:0015871]; neuromast hair cell development [GO:0035675]; otolith formation [GO:0032475]; positive regulation of cell growth [GO:0030307]; thiamine pyrophosphate transmembrane transport [GO:0030974]; transmembrane transport [GO:0055085]	apical plasma membrane [GO:0016324]; integral component of membrane [GO:0016021]; membrane [GO:0016020]; plasma membrane [GO:0005886]
Q6AXR4	Hexb	25.2316	25.4879	25.418	24.9591	25.5709	24.7137	25.4852	25.2657	25.942	25.6655		Hexb	0.0809134	0.738694	1.05769	astrocyte cell migration [GO:0043615]; cellular calcium ion homeostasis [GO:0006874]; cellular protein metabolic process [GO:0044267]; ganglioside catabolic process [GO:0006689]; glycosaminoglycan metabolic process [GO:0030203]; glycosphingolipid metabolic process [GO:0006687]; lipid storage [GO:0019915]; locomotory behavior [GO:0007626]; lysosome organization [GO:0007040]; male courtship behavio…	acrosomal vesicle [GO:0001669]; azurophil granule [GO:0042582]; beta-N-acetylhexosaminidase complex [GO:1905379]; cortical granule [GO:0060473]; extracellular space [GO:0005615]; lysosome [GO:0005764]; membrane [GO:0016020]
Q62636	Rap1b;Rap1a	23.4482	23.6239	23.5135	23.6187	24.0245	23.5185	24.4128	23.1581	23.6596	23.8609		Rap1b;Rap1a	0.076196	0.749275	1.05423	cell population proliferation [GO:0008283]; cellular response to cAMP [GO:0071320]; cellular response to gonadotropin-releasing hormone [GO:0097211]; cellular response to organic cyclic compound [GO:0071407]; cellular response to xenobiotic stimulus [GO:0071466]; establishment of endothelial barrier [GO:0061028]; negative regulation of calcium ion-dependent exocytosis [GO:0045955]; negative regul…	cell-cell junction [GO:0005911]; cytosol [GO:0005829]; lipid droplet [GO:0005811]; plasma membrane [GO:0005886]
P07522	Egf	33.8922	33.3654	33.1126	32.8507	33.4073	33.2693	33.5189	33.393	33.5266	33.2199		Egf	0.0599097	0.7534	1.0424	angiogenesis [GO:0001525]; branching morphogenesis of an epithelial tube [GO:0048754]; epidermal growth factor receptor signaling pathway [GO:0007173]; epidermal growth factor receptor signaling pathway via MAPK cascade [GO:0038029]; ERK1 and ERK2 cascade [GO:0070371]; intracellular signal transduction [GO:0035556]; kidney development [GO:0001822]; mammary gland alveolus development [GO:0060749];…	extracellular exosome [GO:0070062]; extracellular space [GO:0005615]; integral component of membrane [GO:0016021]; plasma membrane [GO:0005886]
P62804	Hist1h4b	27.6534	26.7972	26.4354	26.3413	27.2287	26.9886	26.9045	27.056	27.3472	26.5891		Hist1h4b	0.0858801	0.762836	1.06133	cell differentiation [GO:0030154]; DNA replication-dependent chromatin assembly [GO:0006335]; DNA replication-independent chromatin assembly [GO:0006336]; DNA-templated transcription, initiation [GO:0006352]; negative regulation of megakaryocyte differentiation [GO:0045653]; nucleosome assembly [GO:0006334]; ossification [GO:0001503]	CENP-A containing nucleosome [GO:0043505]; extracellular region [GO:0005576]; nuclear chromosome [GO:0000228]; nucleoplasm [GO:0005654]; nucleosome [GO:0000786]; nucleus [GO:0005634]; protein-containing complex [GO:0032991]
Q6P734	Serping1	24.6641	24.8169	24.3629	24.5072	24.1132	24.5992	24.2119	24.152	25.0667	24.761		Serping1	0.0653022	0.763765	1.0463	aging [GO:0007568]; blood coagulation [GO:0007596]; complement activation, classical pathway [GO:0006958]; fibrinolysis [GO:0042730]; innate immune response [GO:0045087]; negative regulation of complement activation, lectin pathway [GO:0001869]; negative regulation of endopeptidase activity [GO:0010951]	extracellular space [GO:0005615]
P01835	P01835	33.2004	33.3797	33.2418	32.9062	33.4062	33.165	32.7306	33.7081	33.3236	32.9147		P01835	-0.0584232	0.767664	1.04133	regulation of immune response [GO:0050776]
P09006	Serpina3n	26.7653	27.5065	27.7894	26.8816	26.9064	26.9562	27.3007	26.8017	27.8218	26.5127		Serpina3n	-0.0912613	0.770385	1.0653	cellular response to cAMP [GO:0071320]; cellular response to glucocorticoid stimulus [GO:0071385]; cellular response to interferon-gamma [GO:0071346]; cellular response to interleukin-1 [GO:0071347]; cellular response to interleukin-6 [GO:0071354]; inflammatory response [GO:0006954]; negative regulation of endopeptidase activity [GO:0010951]; response to bacterium [GO:0009617]; response to cytoki…	extracellular region [GO:0005576]; extracellular space [GO:0005615]
P07151	B2m	28.1581	27.5295	27.6032	26.4374	27.3	27.952	27.8386	27.3728	25.8181	27.345		B2m	-0.14034	0.774429	1.10216	amyloid fibril formation [GO:1990000]; antigen processing and presentation of endogenous peptide antigen via MHC class I [GO:0019885]; antigen processing and presentation of exogenous peptide antigen via MHC class II [GO:0019886]; antigen processing and presentation of exogenous protein antigen via MHC class Ib, TAP-dependent [GO:0002481]; cellular response to iron(III) ion [GO:0071283]; cellular…	external side of plasma membrane [GO:0009897]; extracellular space [GO:0005615]; HFE-transferrin receptor complex [GO:1990712]; MHC class II protein complex [GO:0042613]; MHC class I peptide loading complex [GO:0042824]; MHC class I protein complex [GO:0042612]
O70513	Lgals3bp	25.3336	25.0675	24.7702	25.0121	24.7139	25.307	24.8019	24.8634	24.9306	24.7868		Lgals3bp	-0.0414972	0.784758	1.02918	cell adhesion [GO:0007155]	extracellular space [GO:0005615]; membrane [GO:0016020]
P04639	Apoa1	23.406	23.6529	25.2441	25.8216	24.4352	23.8592	24.0462	23.7446	26.791	25.1413		Apoa1	0.204474	0.788171	1.15227	adrenal gland development [GO:0030325]; animal organ regeneration [GO:0031100]; blood vessel endothelial cell migration [GO:0043534]; cholesterol biosynthetic process [GO:0006695]; cholesterol efflux [GO:0033344]; cholesterol homeostasis [GO:0042632]; cholesterol import [GO:0070508]; cholesterol metabolic process [GO:0008203]; cholesterol transport [GO:0030301]; endothelial cell proliferation [GO…	cell surface [GO:0009986]; chylomicron [GO:0042627]; cytoplasmic vesicle [GO:0031410]; discoidal high-density lipoprotein particle [GO:0034365]; endocytic vesicle [GO:0030139]; extracellular region [GO:0005576]; extracellular space [GO:0005615]; high-density lipoprotein particle [GO:0034364]; intermediate-density lipoprotein particle [GO:0034363]; low-density lipoprotein particle [GO:0034362]; nu…
P02767	Ttr	28.1371	28.4116	28.686	27.1097	27.5959	28.4765	28.099	27.1177	27.9501	27.8053		Ttr	-0.0983281	0.792326	1.07053	purine nucleobase metabolic process [GO:0006144]; retinol metabolic process [GO:0042572]; thyroid hormone metabolic process [GO:0042403]; thyroid hormone transport [GO:0070327]	extracellular space [GO:0005615]; protein-containing complex [GO:0032991]
P14841	Cst3	29.4225	29.9756	29.3107	29.2937	29.7426	29.495	29.4786	29.2055	29.9096	29.42		Cst3	-0.0472844	0.794856	1.03332	apoptotic process [GO:0006915]; brain development [GO:0007420]; cell activation [GO:0001775]; cellular response to hydrogen peroxide [GO:0070301]; cellular response to oxidative stress [GO:0034599]; circadian sleep/wake cycle, REM sleep [GO:0042747]; defense response [GO:0006952]; embryo implantation [GO:0007566]; eye development [GO:0001654]; male gonad development [GO:0008584]; negative regulat…	axon [GO:0030424]; basement membrane [GO:0005604]; cell projection [GO:0042995]; contractile fiber [GO:0043292]; cytoplasm [GO:0005737]; endoplasmic reticulum [GO:0005783]; extracellular region [GO:0005576]; extracellular space [GO:0005615]; Golgi apparatus [GO:0005794]; lysosome [GO:0005764]; multivesicular body [GO:0005771]; neuronal cell body [GO:0043025]; nuclear membrane [GO:0031965]; perinu…
P06866	Hp	25.9451	26.8134	27.6339	27.1559	27.6683	26.9802	26.79	26.6637	28.3842	26.9826		Hp	0.11686	0.799395	1.08437	acute inflammatory response [GO:0002526]; acute-phase response [GO:0006953]; aging [GO:0007568]; animal organ regeneration [GO:0031100]; defense response to bacterium [GO:0042742]; immune system process [GO:0002376]; liver development [GO:0001889]; negative regulation of hydrogen peroxide catabolic process [GO:2000296]; negative regulation of oxidoreductase activity [GO:0051354]; Notch signaling …	blood microparticle [GO:0072562]; endoplasmic reticulum [GO:0005783]; extracellular space [GO:0005615]; Golgi apparatus [GO:0005794]; haptoglobin-hemoglobin complex [GO:0031838]
P04764	Eno1	25.5002	27.3765	26.6756	27.811	26.4106	26.1932	26.6647	26.2586	27.1557	26.923		Eno1	-0.115745	0.799668	1.08353	canonical glycolysis [GO:0061621]; cellular response to hypoxia [GO:0071456]; cellular response to interleukin-7 [GO:0098761]; ERK1 and ERK2 cascade [GO:0070371]; glycolytic process [GO:0006096]; in utero embryonic development [GO:0001701]; negative regulation of cell growth [GO:0030308]; negative regulation of hypoxia-induced intrinsic apoptotic signaling pathway [GO:1903298]; negative regulatio…	cell cortex [GO:0005938]; cell surface [GO:0009986]; cytoplasm [GO:0005737]; cytosol [GO:0005829]; extrinsic component of plasma membrane [GO:0019897]; growth cone [GO:0030426]; membrane [GO:0016020]; membrane raft [GO:0045121]; neuron projection [GO:0043005]; nuclear outer membrane [GO:0005640]; phosphopyruvate hydratase complex [GO:0000015]; plasma membrane [GO:0005886]; synaptic membrane [GO:0…
O55006	O55006	26.4315	25.8291	26.5783	26.1247	25.6163	26.579	26.342	25.8901	26.3614	25.7147		O55006	0.0614616	0.805354	1.04352	bone remodeling [GO:0046849]	extracellular region [GO:0005576]
P28826	Mep1b	28.3	28.6737	28.3051	28.5715	28.3784	28.7388	28.3817	28.0101	28.7435	28.5519		Mep1b	0.0394671	0.806351	1.02773	inflammatory response [GO:0006954]; proteolysis [GO:0006508]; toxin transport [GO:1901998]	extracellular region [GO:0005576]; integral component of plasma membrane [GO:0005887]; membrane [GO:0016020]; meprin A complex [GO:0017090]
P62630	Eef1a1;Eef1a2	25.197	26.2506	26.1325	26.7717	25.8068	26.2053	26.2204	25.3414	26.3144	26.4875		Eef1a1;Eef1a2	0.0821281	0.808491	1.05858	aging [GO:0007568]; cellular response to epidermal growth factor stimulus [GO:0071364]; cellular response to nerve growth factor stimulus [GO:1990090]; cellular response to xenobiotic stimulus [GO:0071466]; negative regulation of reactive oxygen species biosynthetic process [GO:1903427]; positive regulation of cell death [GO:0010942]; positive regulation of neuron projection development [GO:00109…	cortical actin cytoskeleton [GO:0030864]; cytoplasm [GO:0005737]; cytosol [GO:0005829]; lysosomal membrane [GO:0005765]; nucleolus [GO:0005730]; nucleus [GO:0005634]; plasma membrane [GO:0005886]; ruffle membrane [GO:0032587]
P00884	Aldob	25.2806	26.5627	26.0995	28.0267	26.0244	25.3456	26.4154	25.6802	26.8092	27.0711		Aldob	-0.134469	0.816855	1.09769	cellular response to extracellular stimulus [GO:0031668]; cellular response to insulin stimulus [GO:0032869]; fructose 1,6-bisphosphate metabolic process [GO:0030388]; fructose metabolic process [GO:0006000]; glycolytic process [GO:0006096]; liver development [GO:0001889]; NADH oxidation [GO:0006116]; positive regulation of ATP-dependent activity [GO:0032781]; response to amino acid [GO:0043200];…	centriolar satellite [GO:0034451]; cytoplasm [GO:0005737]; cytosol [GO:0005829]; intracellular membrane-bounded organelle [GO:0043231]; lysosome [GO:0005764]; microtubule organizing center [GO:0005815]; nucleus [GO:0005634]; perinuclear region of cytoplasm [GO:0048471]; plasma membrane [GO:0005886]; rough endoplasmic reticulum membrane [GO:0030867]; smooth endoplasmic reticulum membrane [GO:00308…
Q64240	Ambp	30.3592	30.6788	30.5831	30.8183	30.2645	30.7191	30.4185	30.6526	30.4778	30.5726		Ambp	0.0273573	0.818999	1.01914	cellular oxidant detoxification [GO:0098869]; cellular response to reactive oxygen species [GO:0034614]; cytochrome c metabolic process [GO:1903606]; hemoglobin metabolic process [GO:0020027]; protein catabolic process [GO:0030163]; protein-chromophore linkage [GO:0018298]	cell surface [GO:0009986]; extracellular space [GO:0005615]; extrinsic component of mitochondrial inner membrane [GO:0031314]; intracellular membrane-bounded organelle [GO:0043231]; plasma membrane [GO:0005886]
P31977	Ezr	27.1913	29.2314	28.6039	29.3396	28.3669	28.7459	29.2357	28.0089	28.3946	28.8651		Ezr	0.103396	0.819499	1.0743	actin cytoskeleton reorganization [GO:0031532]; actin filament bundle assembly [GO:0051017]; astral microtubule organization [GO:0030953]; cellular response to cAMP [GO:0071320]; cortical microtubule organization [GO:0043622]; epithelial cell differentiation [GO:0030855]; establishment of centrosome localization [GO:0051660]; establishment of endothelial barrier [GO:0061028]; establishment or mai…	actin cytoskeleton [GO:0015629]; actin filament [GO:0005884]; adherens junction [GO:0005912]; apical part of cell [GO:0045177]; apical plasma membrane [GO:0016324]; astrocyte projection [GO:0097449]; basolateral plasma membrane [GO:0016323]; brush border [GO:0005903]; cell body [GO:0044297]; cell cortex [GO:0005938]; cell periphery [GO:0071944]; cell projection [GO:0042995]; cell tip [GO:0051286]…
P05545	Serpina3k	32.1491	32.7674	32.1322	32.0348	32.7211	32.6835	32.2011	32.2399	32.5351	32.3434		Serpina3k	0.039675	0.833259	1.02788	negative regulation of endopeptidase activity [GO:0010951]	extracellular space [GO:0005615]
P22283	Crp2	30.7273	30.0437	30.832	30.5915	31.3964	30.6315	32.6635	30.6012	28.6884	30.2843		Crp2	-0.144422	0.834505	1.10529		extracellular space [GO:0005615]
Q9QZ76	Mb	26.5769	23.7164	22.7316	23.1341	24.2592	25.2931	23.5311	23.6302	23.911	23.2288		Mb	-0.164798	0.834866	1.12101	brown fat cell differentiation [GO:0050873]; enucleate erythrocyte differentiation [GO:0043353]; heart development [GO:0007507]; oxygen transport [GO:0015671]; response to hormone [GO:0009725]; response to hydrogen peroxide [GO:0042542]; response to hypoxia [GO:0001666]; slow-twitch skeletal muscle fiber contraction [GO:0031444]
Q9JJ19	Slc9a3r1	27.5946	28.8551	28.5802	29.4131	28.2338	28.1419	28.7684	28.21	29.3488	28.6097		Slc9a3r1	0.0804151	0.835223	1.05732	actin cytoskeleton organization [GO:0030036]; adenylate cyclase-activating dopamine receptor signaling pathway [GO:0007191]; auditory receptor cell stereocilium organization [GO:0060088]; bile acid secretion [GO:0032782]; cellular phosphate ion homeostasis [GO:0030643]; cellular protein localization [GO:0034613]; cerebrospinal fluid circulation [GO:0090660]; cilium organization [GO:0044782]; esta…	apical part of cell [GO:0045177]; apical plasma membrane [GO:0016324]; brush border membrane [GO:0031526]; cell periphery [GO:0071944]; cytoplasm [GO:0005737]; endomembrane system [GO:0012505]; extracellular region [GO:0005576]; filopodium [GO:0030175]; membrane [GO:0016020]; membrane raft [GO:0045121]; microvillus [GO:0005902]; microvillus membrane [GO:0031528]; perinuclear region of cytoplasm […
P24090	Ahsg	28.4935	28.7473	28.1411	28.8309	27.5823	28.3926	28.4879	28.4567	28.7781	27.9612		Ahsg	0.0562581	0.836209	1.03977	acute-phase response [GO:0006953]; animal organ regeneration [GO:0031100]; cellular response to insulin stimulus [GO:0032869]; cerebral cortex development [GO:0021987]; male gonad development [GO:0008584]; negative regulation of bone mineralization [GO:0030502]; negative regulation of cell growth [GO:0030308]; negative regulation of endopeptidase activity [GO:0010951]; negative regulation of insu…	collagen-containing extracellular matrix [GO:0062023]; extracellular matrix [GO:0031012]; extracellular region [GO:0005576]; extracellular space [GO:0005615]; protein-containing complex [GO:0032991]
Q641X3	Hexa	24.585	24.2147	23.9334	23.8824	24.2671	24.0697	24.974	24.0723	24.2304	23.7804		Hexa	0.0488571	0.842166	1.03445	adult walking behavior [GO:0007628]; carbohydrate metabolic process [GO:0005975]; cell morphogenesis involved in neuron differentiation [GO:0048667]; ganglioside catabolic process [GO:0006689]; glycosaminoglycan biosynthetic process [GO:0006024]; glycosaminoglycan metabolic process [GO:0030203]; lipid storage [GO:0019915]; locomotory behavior [GO:0007626]; lysosome organization [GO:0007040]; myel…	azurophil granule [GO:0042582]; beta-N-acetylhexosaminidase complex [GO:1905379]; lysosome [GO:0005764]; membrane [GO:0016020]
P27139	Ca2	25.1778	25.216	25.6068	26.5101	27.0078	24.8295	24.6996	27.0967	26.9427	26.5985		Ca2	0.129701	0.844347	1.09407	angiotensin-activated signaling pathway [GO:0038166]; carbon dioxide transport [GO:0015670]; cellular response to fluid shear stress [GO:0071498]; kidney development [GO:0001822]; morphogenesis of an epithelium [GO:0002009]; odontogenesis of dentin-containing tooth [GO:0042475]; one-carbon metabolic process [GO:0006730]; osteoclast differentiation [GO:0030316]; positive regulation of bone resorpt…	apical part of cell [GO:0045177]; axon [GO:0030424]; basolateral plasma membrane [GO:0016323]; cytoplasm [GO:0005737]; cytosol [GO:0005829]; extracellular space [GO:0005615]; microvillus [GO:0005902]; myelin sheath [GO:0043209]; plasma membrane [GO:0005886]
Q8CHN3	Wfdc2	26.5912	25.9029	26.1006	25.7484	25.1989	26.2791	25.8211	26.1029	25.9245	25.6558		Wfdc2	0.0482849	0.852675	1.03403	antibacterial humoral response [GO:0019731]; innate immune response [GO:0045087]	extracellular space [GO:0005615]
P35704	Prdx2	23.504	23.5907	23.62	24.9663	25.0933	23.4461	23.554	24.4327	25.2908	24.4868		Prdx2	0.0872412	0.864064	1.06234	cell redox homeostasis [GO:0045454]; cellular response to oxidative stress [GO:0034599]; defense response to tumor cell [GO:0002357]; homeostasis of number of cells [GO:0048872]; hydrogen peroxide catabolic process [GO:0042744]; hydrogen peroxide metabolic process [GO:0042743]; leukocyte activation [GO:0045321]; negative regulation of extrinsic apoptotic signaling pathway [GO:2001237]; negative r…	cytosol [GO:0005829]
Q6MG61	Clic1	24.7956	26.0077	26.3528	27.3997	25.0673	25.624	26.2457	24.9849	26.8113	26.4243		Clic1	0.0934116	0.873376	1.06689	chloride transport [GO:0006821]; glutathione metabolic process [GO:0006749]; positive regulation of osteoblast differentiation [GO:0045669]; regulation of cell cycle [GO:0051726]; regulation of ion transmembrane transport [GO:0034765]; regulation of mitochondrial membrane potential [GO:0051881]	chloride channel complex [GO:0034707]; cytoplasm [GO:0005737]; extracellular exosome [GO:0070062]; membrane [GO:0016020]; mitochondrion [GO:0005739]; nuclear envelope [GO:0005635]; nuclear membrane [GO:0031965]; nucleus [GO:0005634]; perinuclear region of cytoplasm [GO:0048471]; plasma membrane [GO:0005886]
Q01177	Plg	29.2722	29.8717	29.8882	29.2098	29.3236	29.8563	29.3264	29.231	29.9074	29.0566		Plg	-0.0375558	0.873523	1.02637	biological process involved in interaction with symbiont [GO:0051702]; blood coagulation [GO:0007596]; extracellular matrix disassembly [GO:0022617]; fibrinolysis [GO:0042730]; labyrinthine layer blood vessel development [GO:0060716]; mononuclear cell migration [GO:0071674]; muscle cell cellular homeostasis [GO:0046716]; myoblast differentiation [GO:0045445]; negative regulation of cell-substrate…	cell surface [GO:0009986]; extracellular space [GO:0005615]; extrinsic component of external side of plasma membrane [GO:0031232]; extrinsic component of plasma membrane [GO:0019897]; glutamatergic synapse [GO:0098978]; intracellular membrane-bounded organelle [GO:0043231]; plasma membrane [GO:0005886]; Schaffer collateral - CA1 synapse [GO:0098685]
P63102	Ywhaz	25.3591	25.5945	26.2598	26.7309	26.1867	25.3636	27.1328	25.8138	26.3783	25.7626		Ywhaz	0.0640038	0.874689	1.04536	angiogenesis [GO:0001525]; cellular protein localization [GO:0034613]; ERK1 and ERK2 cascade [GO:0070371]; establishment of Golgi localization [GO:0051683]; Golgi reassembly [GO:0090168]; histamine secretion by mast cell [GO:0002553]; lung development [GO:0030324]; negative regulation of transcription by RNA polymerase II [GO:0000122]; protein phosphorylation [GO:0006468]; protein targeting [GO:0…	cell leading edge [GO:0031252]; cytoplasm [GO:0005737]; glutamatergic synapse [GO:0098978]; hippocampal mossy fiber to CA3 synapse [GO:0098686]; melanosome [GO:0042470]; mitochondrion [GO:0005739]; nucleus [GO:0005634]; perinuclear region of cytoplasm [GO:0048471]; postsynaptic density [GO:0014069]; protein-containing complex [GO:0032991]
P06760	Gusb	30.6528	27.9544	29.0304	29.1964	30.6103	27.9121	29.9538	30.1326	30.7088	29.2968		Gusb	0.111939	0.877176	1.08068	carbohydrate metabolic process [GO:0005975]; glucuronoside catabolic process [GO:0019391]	extracellular space [GO:0005615]; lysosome [GO:0005764]
Q6AYS7	Acy1a;Acy1b	25.3002	25.4861	25.1832	26.4939	25.3079	25.237	25.5049	25.6199	24.9395	26.2142		Acy1a;Acy1b	-0.0511812	0.877195	1.03611	cellular amino acid metabolic process [GO:0006520]; protein catabolic process [GO:0030163]	cytoplasm [GO:0005737]; extracellular exosome [GO:0070062]
P02781	Psbpc2	31.1661	30.2488	30.5173	29.6982	31.4352	30.5876	32.8991	31.1018	26.8657	30.8052		Psbpc2	-0.161216	0.879942	1.11823		extracellular region [GO:0005576]; extracellular space [GO:0005615]
P04937-4	Fn1	28.302	27.5853	27.4481	28.0086	27.6053	27.8403	27.8168	27.7306	28.0387	27.3834		Fn1	-0.0278987	0.887731	1.01953	acute-phase response [GO:0006953]; angiogenesis [GO:0001525]; biological process involved in interaction with symbiont [GO:0051702]; blood coagulation, fibrin clot formation [GO:0072378]; calcium-independent cell-matrix adhesion [GO:0007161]; cell activation [GO:0001775]; cell adhesion [GO:0007155]; cell-matrix adhesion [GO:0007160]; cell-substrate junction assembly [GO:0007044]; cellular respons…	apical plasma membrane [GO:0016324]; basement membrane [GO:0005604]; collagen-containing extracellular matrix [GO:0062023]; endoplasmic reticulum-Golgi intermediate compartment [GO:0005793]; extracellular exosome [GO:0070062]; extracellular matrix [GO:0031012]; extracellular space [GO:0005615]; fibrinogen complex [GO:0005577]
P36373	Klk7	30.5472	31.1255	30.4418	30.6589	30.2647	30.2187	30.8415	30.9327	29.9251	30.9434		Klk7	-0.0353507	0.89329	1.02481	positive regulation of antibacterial peptide production [GO:0002803]; regulation of systemic arterial blood pressure [GO:0003073]; zymogen activation [GO:0031638]	cornified envelope [GO:0001533]; epidermal lamellar body [GO:0097209]; extracellular space [GO:0005615]; secretory granule [GO:0030141]
P15684	Anpep	29.5503	29.5633	29.1404	29.7421	28.5741	29.6276	29.7851	28.3297	29.618	28.9791		Anpep	-0.0461027	0.896592	1.03247	angiogenesis [GO:0001525]; cell differentiation [GO:0030154]; negative regulation of renal sodium excretion [GO:0035814]; peptide catabolic process [GO:0043171]; proteolysis [GO:0006508]; regulation of blood pressure [GO:0008217]; signal transduction [GO:0007165]	brush border membrane [GO:0031526]; cytoplasm [GO:0005737]; endoplasmic reticulum-Golgi intermediate compartment [GO:0005793]; external side of plasma membrane [GO:0009897]; extracellular exosome [GO:0070062]; extracellular space [GO:0005615]; integral component of membrane [GO:0016021]; plasma membrane [GO:0005886]
O88989	Mdh1	25.4506	26.6672	25.7858	27.0623	26.0879	25.8231	26.2305	26.1406	26.2195	26.4749		Mdh1	-0.0330233	0.917893	1.02315	malate metabolic process [GO:0006108]; NADH metabolic process [GO:0006734]; NAD metabolic process [GO:0019674]; oxaloacetate metabolic process [GO:0006107]; tricarboxylic acid cycle [GO:0006099]	cytosol [GO:0005829]
Q63716	Prdx1	24.6881	25.7487	24.8883	25.9435	25.6233	25.2554	25.4667	25.2438	25.3216	25.7417		Prdx1	0.0274544	0.920066	1.01921	cell population proliferation [GO:0008283]; cell redox homeostasis [GO:0045454]; erythrocyte homeostasis [GO:0034101]; hydrogen peroxide catabolic process [GO:0042744]; leukocyte activation [GO:0045321]; natural killer cell activation [GO:0030101]; natural killer cell mediated cytotoxicity [GO:0042267]; regulation of NIK/NF-kappaB signaling [GO:1901222]; regulation of stress-activated MAPK cascad…	cytoplasm [GO:0005737]; cytosol [GO:0005829]; euchromatin [GO:0000791]; mitochondrial matrix [GO:0005759]; nucleolus [GO:0005730]; nucleus [GO:0005634]; peroxisomal matrix [GO:0005782]
P63018	Hspa8	26.4175	26.8412	26.8794	27.5006	26.9709	26.6811	27.5688	27.1153	25.2967	27.7102		Hspa8	-0.0475129	0.921497	1.03348	aging [GO:0007568]; ATP metabolic process [GO:0046034]; axo-dendritic transport [GO:0008088]; cellular response to cadmium ion [GO:0071276]; cellular response to heat [GO:0034605]; cellular response to unfolded protein [GO:0034620]; cerebellum development [GO:0021549]; chaperone cofactor-dependent protein refolding [GO:0051085]; chaperone-mediated autophagy [GO:0061684]; chaperone-mediated autoph…	asymmetric synapse [GO:0032279]; autophagosome [GO:0005776]; axon [GO:0030424]; cell surface [GO:0009986]; chaperone complex [GO:0101031]; cytoplasm [GO:0005737]; cytosol [GO:0005829]; dendrite [GO:0030425]; dendritic shaft [GO:0043198]; dendritic spine [GO:0043197]; extracellular exosome [GO:0070062]; glutamatergic synapse [GO:0098978]; glycinergic synapse [GO:0098690]; intermediate filament [GO…
P14740	Dpp4	29.6544	29.673	29.2313	29.8154	29.1258	29.9028	29.6714	29.3478	29.736	28.7333		Dpp4	-0.0216911	0.932212	1.01515	B-1a B cell differentiation [GO:0002337]; behavioral fear response [GO:0001662]; cell adhesion [GO:0007155]; endothelial cell migration [GO:0043542]; establishment of localization [GO:0051234]; locomotory exploration behavior [GO:0035641]; negative regulation of extracellular matrix disassembly [GO:0010716]; negative regulation of neutrophil chemotaxis [GO:0090024]; positive regulation of cell po…	apical plasma membrane [GO:0016324]; cell surface [GO:0009986]; endocytic vesicle [GO:0030139]; endoplasmic reticulum [GO:0005783]; extracellular region [GO:0005576]; Golgi apparatus [GO:0005794]; integral component of membrane [GO:0016021]; intercellular canaliculus [GO:0046581]; lamellipodium [GO:0030027]; lamellipodium membrane [GO:0031258]; membrane raft [GO:0045121]; plasma membrane [GO:0005…
P12346	Tf	32.5563	33.0005	33.6804	32.2856	32.9483	33.1586	32.938	32.4335	33.5485	32.2572		Tf	-0.0270574	0.937424	1.01893	actin filament organization [GO:0007015]; acute-phase response [GO:0006953]; antibacterial humoral response [GO:0019731]; apoptotic process [GO:0006915]; cellular iron ion homeostasis [GO:0006879]; cellular response to cAMP [GO:0071320]; cellular response to follicle-stimulating hormone stimulus [GO:0071372]; cellular response to iron ion [GO:0071281]; ERK1 and ERK2 cascade [GO:0070371]; iron ion…	apical plasma membrane [GO:0016324]; basal part of cell [GO:0045178]; basal plasma membrane [GO:0009925]; basement membrane [GO:0005604]; cell surface [GO:0009986]; cell tip [GO:0051286]; clathrin-coated pit [GO:0005905]; cytoplasmic vesicle [GO:0031410]; early endosome [GO:0005769]; endocytic vesicle [GO:0030139]; endosome [GO:0005768]; extracellular region [GO:0005576]; extracellular space [GO:…
P20760	Igg-2a	30.0571	30.8869	30.9818	29.8621	30.8169	30.7049	30.4781	30.5696	30.3011	30.6424		Igg-2a	0.0182402	0.942045	1.01272	B cell receptor signaling pathway [GO:0050853]; complement activation, classical pathway [GO:0006958]; defense response to bacterium [GO:0042742]; innate immune response [GO:0045087]; phagocytosis, engulfment [GO:0006911]; phagocytosis, recognition [GO:0006910]; positive regulation of B cell activation [GO:0050871]	external side of plasma membrane [GO:0009897]; immunoglobulin complex, circulating [GO:0042571]
P19468	Gclc	26.5454	27.3057	26.8504	28.1413	26.0791	26.0123	27.3993	26.3175	27.8159	27.5503		Gclc	0.0346907	0.946598	1.02434	aging [GO:0007568]; blood vessel diameter maintenance [GO:0097746]; cell redox homeostasis [GO:0045454]; cellular response to fibroblast growth factor stimulus [GO:0044344]; cellular response to follicle-stimulating hormone stimulus [GO:0071372]; cellular response to glucose stimulus [GO:0071333]; cellular response to hepatocyte growth factor stimulus [GO:0035729]; cellular response to insulin st…	cytosol [GO:0005829]; glutamate-cysteine ligase complex [GO:0017109]; mitochondrion [GO:0005739]
P15399-2	Pbsn	33.2921	29.7189	29.9514	30.3875	33.604	30.0655	30.7107	33.5744	28.98	34.0332		Pbsn	0.0819685	0.951511	1.05846		extracellular space [GO:0005615]; nucleus [GO:0005634]
Q68FP1-2	Gsn	29.6248	29.8363	29.7274	29.6263	29.6748	29.635	29.897	29.6304	29.5787	29.7281		Gsn	-0.00410594	0.953769	1.00285	actin cytoskeleton organization [GO:0030036]; actin filament capping [GO:0051693]; actin filament depolymerization [GO:0030042]; actin filament polymerization [GO:0030041]; actin filament reorganization [GO:0090527]; actin filament severing [GO:0051014]; actin nucleation [GO:0045010]; actin polymerization or depolymerization [GO:0008154]; aging [GO:0007568]; amyloid fibril formation [GO:1990000];…	actin cap [GO:0030478]; actin cytoskeleton [GO:0015629]; cortical actin cytoskeleton [GO:0030864]; cytoplasm [GO:0005737]; cytosol [GO:0005829]; extracellular region [GO:0005576]; extracellular space [GO:0005615]; lamellipodium [GO:0030027]; myelin sheath [GO:0043209]; perinuclear region of cytoplasm [GO:0048471]; phagocytic vesicle [GO:0045335]; plasma membrane [GO:0005886]; podosome [GO:0002102…
P08937	Obp1f	27.0023	25.5406	24.2816	25.9788	24.8583	25.4919	25.7285	25.8219	25.5225	24.9514		Obp1f	-0.0290683	0.954311	1.02035	response to stimulus [GO:0050896]; sensory perception of smell [GO:0007608]	extracellular space [GO:0005615]
P05544	Serpina3l	32.7833	33.3832	32.634	32.676	33.0527	33.249	32.8836	32.854	32.8615	32.7248		Serpina3l	0.00875269	0.959067	1.00609	negative regulation of endopeptidase activity [GO:0010951]	extracellular space [GO:0005615]
O35763	Msn	26.1007	26.991	26.8696	27.6559	26.1246	26.7951	26.8925	25.9983	27.1728	26.7933		Msn	-0.0179497	0.960533	1.01252	cellular response to testosterone stimulus [GO:0071394]; establishment of endothelial barrier [GO:0061028]; establishment of epithelial cell apical/basal polarity [GO:0045198]; gland morphogenesis [GO:0022612]; immunological synapse formation [GO:0001771]; leukocyte cell-cell adhesion [GO:0007159]; leukocyte migration [GO:0050900]; membrane to membrane docking [GO:0022614]; positive regulation of…	adherens junction [GO:0005912]; apical part of cell [GO:0045177]; apical plasma membrane [GO:0016324]; basolateral plasma membrane [GO:0016323]; cell periphery [GO:0071944]; cell surface [GO:0009986]; cell tip [GO:0051286]; cytoplasmic side of plasma membrane [GO:0009898]; cytoskeleton [GO:0005856]; filopodium [GO:0030175]; filopodium membrane [GO:0031527]; microvillus [GO:0005902]; microvillus m…
P09606	Glul	23.6387	25.3968	23.753	25.5051	24.2122	23.9162	24.9839	23.9386	25.1915	24.5923		Glul	0.0233641	0.96222	1.01633	ammonia assimilation cycle [GO:0019676]; angiogenesis [GO:0001525]; cell population proliferation [GO:0008283]; cellular response to starvation [GO:0009267]; glutamate metabolic process [GO:0006536]; glutamine biosynthetic process [GO:0006542]; neurotransmitter metabolic process [GO:0042133]; positive regulation of epithelial cell proliferation [GO:0050679]; positive regulation of insulin secreti…	axon terminus [GO:0043679]; cell body [GO:0044297]; cell projection [GO:0042995]; cytoplasm [GO:0005737]; cytosol [GO:0005829]; glial cell projection [GO:0097386]; intracellular membrane-bounded organelle [GO:0043231]; mitochondrion [GO:0005739]; myelin sheath [GO:0043209]; neuron projection [GO:0043005]; perikaryon [GO:0043204]; plasma membrane [GO:0005886]; protein-containing complex [GO:003299…
P51635	Akr1a1	25.0218	26.9449	26.0529	28.0008	26.1242	25.3749	26.6688	26.3899	27.0428	26.5332		Akr1a1	-0.0270106	0.963388	1.0189	aldehyde catabolic process [GO:0046185]; cellular detoxification of aldehyde [GO:0110095]; daunorubicin metabolic process [GO:0044597]; D-glucuronate catabolic process [GO:0042840]; doxorubicin metabolic process [GO:0044598]; L-ascorbic acid biosynthetic process [GO:0019853]; lipid metabolic process [GO:0006629]	apical plasma membrane [GO:0016324]; cytosol [GO:0005829]; synapse [GO:0045202]
P21704	Dnase1	31.8181	31.5392	31.7939	32.1669	31.9575	31.3323	31.634	31.8031	32.3327	32.139		Dnase1	-0.006856	0.974224	1.00476	apoptotic process [GO:0006915]; DNA catabolic process [GO:0006308]; DNA catabolic process, endonucleolytic [GO:0000737]; neutrophil activation involved in immune response [GO:0002283]; regulation of acute inflammatory response [GO:0002673]; regulation of neutrophil mediated cytotoxicity [GO:0070948]	extracellular region [GO:0005576]; nuclear envelope [GO:0005635]; nucleus [GO:0005634]; zymogen granule [GO:0042588]
P00758	Ngfg	31.3501	30.9318	31.7763	32.0569	30.5072	30.4643	31.6116	31.027	31.3287	32.1327		Ngfg	-0.0115807	0.977352	1.00085	regulation of systemic arterial blood pressure [GO:0003073]; zymogen activation [GO:0031638]	secretory granule [GO:0030141]
P63259	Actg1;Actb	29.4128	30.6275	30.7688	31.7941	30.3498	29.9811	30.5129	29.8577	31.2518	31.4088		Actg1;Actb	0.0118551	0.981567	1.00825	angiogenesis [GO:0001525]; cellular response to interferon-gamma [GO:0071346]; morphogenesis of a polarized epithelium [GO:0001738]; positive regulation of cell migration [GO:0030335]; positive regulation of gene expression [GO:0010628]; positive regulation of wound healing [GO:0090303]; protein localization to bicellular tight junction [GO:1902396]; regulation of focal adhesion assembly [GO:0051…	actin cytoskeleton [GO:0015629]; actin filament [GO:0005884]; apical junction complex [GO:0043296]; apical part of cell [GO:0045177]; basal body patch [GO:0120220]; calyx of Held [GO:0044305]; cell-cell junction [GO:0005911]; cytoskeleton [GO:0005856]; cytosol [GO:0005829]; dense body [GO:0097433]; extracellular exosome [GO:0070062]; filamentous actin [GO:0031941]; focal adhesion [GO:0005925]; my…
P20767	P20767	29.0207	28.5463	29.7105	29.6384	29.9018	28.5803	28.6805	30.1253	29.6007	29.8642		P20767	0.00666651	0.987187	1.00463	B cell receptor signaling pathway [GO:0050853]; complement activation, classical pathway [GO:0006958]; defense response to bacterium [GO:0042742]; innate immune response [GO:0045087]; phagocytosis, engulfment [GO:0006911]; phagocytosis, recognition [GO:0006910]; positive regulation of B cell activation [GO:0050871]	external side of plasma membrane [GO:0009897]; immunoglobulin complex, circulating [GO:0042571]
P07632	Sod1	29.3052	29.8606	29.3228	29.2592	29.7135	29.2249	29.8586	29.3087	29.8312	29.2263		Sod1	-0.00232607	0.990569	1.00161	aging [GO:0007568]; anterograde axonal transport [GO:0008089]; auditory receptor cell stereocilium organization [GO:0060088]; cell aging [GO:0007569]; cellular iron ion homeostasis [GO:0006879]; cellular response to ATP [GO:0071318]; cellular response to cadmium ion [GO:0071276]; cellular response to oxidative stress [GO:0034599]; cellular response to potassium ion [GO:0035865]; embryo implantati…	axon cytoplasm [GO:1904115]; cytoplasm [GO:0005737]; cytoplasmic vesicle [GO:0031410]; cytosol [GO:0005829]; dendrite cytoplasm [GO:0032839]; dense core granule [GO:0031045]; extracellular region [GO:0005576]; extracellular space [GO:0005615]; lysosome [GO:0005764]; mitochondrial intermembrane space [GO:0005758]; mitochondrion [GO:0005739]; neuronal cell body [GO:0043025]; neuron projection [GO:0…
P97574	Stc1	24.5337	24.2877	25.0966	25.1847	24.4568	24.6877	24.675	24.7774	24.3127	25.097		Stc1	-0.00195811	0.993096	1.00136	bone development [GO:0060348]; cellular calcium ion homeostasis [GO:0006874]; cellular response to cAMP [GO:0071320]; cellular response to glucocorticoid stimulus [GO:0071385]; cellular response to hypoxia [GO:0071456]; chondrocyte proliferation [GO:0035988]; decidualization [GO:0046697]; embryo implantation [GO:0007566]; endothelial cell morphogenesis [GO:0001886]; growth plate cartilage axis sp…	apical plasma membrane [GO:0016324]; cytoplasm [GO:0005737]; extracellular space [GO:0005615]; nucleus [GO:0005634]
O35568	Efemp1	25.1027	26.1294	24.5618	25.1247	25.5073	25.4287	25.7165	25.2027	25.0157	25.05		Efemp1	-0.00245079	0.993471	1.0017	camera-type eye development [GO:0043010]; embryonic eye morphogenesis [GO:0048048]; epidermal growth factor receptor signaling pathway [GO:0007173]; negative regulation of chondrocyte differentiation [GO:0032331]; negative regulation of neuron projection development [GO:0010977]; peptidyl-tyrosine phosphorylation [GO:0018108]; positive regulation of cell population proliferation [GO:0008284]; pos…	basement membrane [GO:0005604]; cytoplasm [GO:0005737]; extracellular space [GO:0005615]
Q64319	Slc3a1	28.9227	29.3936	28.7203	29.1989	28.4054	29.066	29.4756	28.3917	29.5009	28.2006		Slc3a1	-0.00121983	0.997068	1.00085	amino acid transport [GO:0006865]; aspartate transmembrane transport [GO:0015810]; carbohydrate metabolic process [GO:0005975]; gene expression [GO:0010467]; L-cystine transport [GO:0015811]; L-glutamate transmembrane transport [GO:0015813]	apical plasma membrane [GO:0016324]; brush border membrane [GO:0031526]; integral component of plasma membrane [GO:0005887]; plasma membrane [GO:0005886]; vacuolar membrane [GO:0005774]

## Sheet: PCa2 vs. Cont2
		Cont2	Cont2	Cont2	Cont2	Cont2	PCa2	PCa2	PCa2	PCa2	PCa2								Proteins detected in previous studies
Protein IDs	Gene names	LFQ intensity G1C3	LFQ intensity G2C3	LFQ intensity G3C3	LFQ intensity G4C3	LFQ intensity G5C3	LFQ intensity G1C4	LFQ intensity G2C4	LFQ intensity G3C4	LFQ intensity G4C4	LFQ intensity G5C4	Legend	Gene name	log2(Pca2 vs. Cont2)	p-value	Fold change	Gene ontology (biological process)	Gene ontology (cellular component)	Swensen et al., 2021 doi: 10.3389/fmed.2021.548212	Davalieva et al., 2017 doi:10.3390/proteomes6010001	Lima et al., 2022 doi: 10.3390/cancers14082001
P56574	Idh2	25.9	24.6882	25.2862	25.2936	25.5451	23.5081	24.0805	24.8334	24.6863	24.8875	Purple: proteins significantly downregulated in PCa1 vs. Cont1 (p<0.05)	Idh2	-0.943457	0.0214535	1.92313	2-oxoglutarate metabolic process [GO:0006103]; glyoxylate cycle [GO:0006097]; isocitrate metabolic process [GO:0006102]; NADP biosynthetic process [GO:0006741]; NADP metabolic process [GO:0006739]; negative regulation of glial cell migration [GO:1903976]; negative regulation of glial cell proliferation [GO:0060253]; negative regulation of matrix metallopeptidase secretion [GO:1904465]; tricarboxy…	cytosol [GO:0005829]; mitochondrion [GO:0005739]; peroxisome [GO:0005777]
Q5U2Q3	Q5U2Q3	25.8798	25.4802	26.5031	26.5985	26.0714	25.0436	25.5931	25.1024	25.7231	25.1845	Green: proteins significantly upregulated in PCa1 vs. Cont1 (p<0.05)	Q5U2Q3	-0.777231	0.0137387	1.71384		nuclear body [GO:0016604]; nucleus [GO:0005634]
P07522	Egf	33.2973	33.5952	33.3223	33.4571	32.9859	32.7212	33.1379	32.5658	32.8583	33.0763	Blue: proteins whose abundance is not statistically signficant between PCa1 and Cont1 (p>0.05)	Egf	-0.459666	0.0143074	1.37522	angiogenesis [GO:0001525]; branching morphogenesis of an epithelial tube [GO:0048754]; epidermal growth factor receptor signaling pathway [GO:0007173]; epidermal growth factor receptor signaling pathway via MAPK cascade [GO:0038029]; ERK1 and ERK2 cascade [GO:0070371]; intracellular signal transduction [GO:0035556]; kidney development [GO:0001822]; mammary gland alveolus development [GO:0060749];…	extracellular exosome [GO:0070062]; extracellular space [GO:0005615]; integral component of membrane [GO:0016021]; plasma membrane [GO:0005886]	+	+	+
Q64230	Mep1a	30.4078	30.7584	30.6177	30.0869	30.5228	29.7189	30.4166	29.7751	30.2959	30.0937		Mep1a	-0.418689	0.0473124	1.33671	proteolysis [GO:0006508]	membrane [GO:0016020]; meprin A complex [GO:0017090]	+
Q9R0T4	Cdh1	31.0755	31.3507	31.2058	31.1558	31.2785	30.3766	30.8878	30.5147	30.9466	31.3204		Cdh1	-0.404039	0.0488101	1.32321	actin cytoskeleton reorganization [GO:0031532]; adherens junction organization [GO:0034332]; bicellular tight junction assembly [GO:0070830]; calcium-dependent cell-cell adhesion via plasma membrane cell adhesion molecules [GO:0016339]; cell-cell adhesion [GO:0098609]; cell-cell adhesion mediated by cadherin [GO:0044331]; cell-cell adhesion via plasma-membrane adhesion molecules [GO:0098742]; cel…	actin cytoskeleton [GO:0015629]; adherens junction [GO:0005912]; apical junction complex [GO:0043296]; apical part of cell [GO:0045177]; axon [GO:0030424]; axon terminus [GO:0043679]; basolateral plasma membrane [GO:0016323]; catenin complex [GO:0016342]; cell-cell junction [GO:0005911]; cell junction [GO:0030054]; cell periphery [GO:0071944]; cell surface [GO:0009986]; cortical actin cytoskeleto…	+	+
P08932	P08932	29.195	29.5061	29.6719	29.7818	29.6496	29.8434	29.7056	29.8991	29.9058	29.7581		P08932	0.261508	0.0430061	1.19873	acute-phase response [GO:0006953]; negative regulation of blood coagulation [GO:0030195]; negative regulation of endopeptidase activity [GO:0010951]; positive regulation of cytosolic calcium ion concentration [GO:0007204]; vasodilation [GO:0042311]	extracellular region [GO:0005576]; extracellular space [GO:0005615]
P10959	Ces1c	28.6704	29.153	28.8404	28.0503	29.069	29.4647	28.822	29.5603	29.4151	29.5934		Ces1c	0.614495	0.0344177	1.53102	lipid catabolic process [GO:0016042]	endoplasmic reticulum [GO:0005783]; endoplasmic reticulum lumen [GO:0005788]; lipid droplet [GO:0005811]
P04764	Eno1	27.1189	26.4954	26.2208	26.3606	25.574	27.691	27.0144	28.0195	26.7459	27.2278		Eno1	0.985768	0.0194505	1.98037	canonical glycolysis [GO:0061621]; cellular response to hypoxia [GO:0071456]; cellular response to interleukin-7 [GO:0098761]; ERK1 and ERK2 cascade [GO:0070371]; glycolytic process [GO:0006096]; in utero embryonic development [GO:0001701]; negative regulation of cell growth [GO:0030308]; negative regulation of hypoxia-induced intrinsic apoptotic signaling pathway [GO:1903298]; negative regulatio…	cell cortex [GO:0005938]; cell surface [GO:0009986]; cytoplasm [GO:0005737]; cytosol [GO:0005829]; extrinsic component of plasma membrane [GO:0019897]; growth cone [GO:0030426]; membrane [GO:0016020]; membrane raft [GO:0045121]; neuron projection [GO:0043005]; nuclear outer membrane [GO:0005640]; phosphopyruvate hydratase complex [GO:0000015]; plasma membrane [GO:0005886]; synaptic membrane [GO:0…	+
P17475	Serpina1	30.9577	31.2667	31.1963	31.8174	31.8224	31.7566	31.5607	32.0144	31.8773	32.253		Serpina1	0.480307	0.0513227	1.39504	acute-phase response [GO:0006953]; inflammatory response [GO:0006954]; negative regulation of endopeptidase activity [GO:0010951]; negative regulation of serine-type endopeptidase activity [GO:1900004]; response to chromate [GO:0046687]; response to cytokine [GO:0034097]; response to estradiol [GO:0032355]; response to hypoxia [GO:0001666]; response to inorganic substance [GO:0010035]; response t…	endoplasmic reticulum [GO:0005783]; extracellular space [GO:0005615]; Golgi apparatus [GO:0005794]
P12346	Tf	32.9859	33.4892	32.7263	32.982	33.4901	34.6021	33.1392	34.1414	33.6168	33.4986		Tf	0.664914	0.0566922	1.58547	actin filament organization [GO:0007015]; acute-phase response [GO:0006953]; antibacterial humoral response [GO:0019731]; apoptotic process [GO:0006915]; cellular iron ion homeostasis [GO:0006879]; cellular response to cAMP [GO:0071320]; cellular response to follicle-stimulating hormone stimulus [GO:0071372]; cellular response to iron ion [GO:0071281]; ERK1 and ERK2 cascade [GO:0070371]; iron ion…	apical plasma membrane [GO:0016324]; basal part of cell [GO:0045178]; basal plasma membrane [GO:0009925]; basement membrane [GO:0005604]; cell surface [GO:0009986]; cell tip [GO:0051286]; clathrin-coated pit [GO:0005905]; cytoplasmic vesicle [GO:0031410]; early endosome [GO:0005769]; endocytic vesicle [GO:0030139]; endosome [GO:0005768]; extracellular region [GO:0005576]; extracellular space [GO:…
Q5XI43	Mxra8	28.7588	28.8521	29.3559	28.9161	28.6718	28.3483	28.6015	28.3704	28.972	28.5016		Mxra8	-0.352181	0.0639452	1.27649	cell adhesion [GO:0007155]; establishment of glial blood-brain barrier [GO:0060857]	bicellular tight junction [GO:0005923]; cell surface [GO:0009986]; ciliary membrane [GO:0060170]; cytoplasm [GO:0005737]; integral component of membrane [GO:0016021]; nucleus [GO:0005634]
P02770	Alb	35.8565	35.8755	35.7782	35.6057	35.7725	36.6186	35.8048	36.5094	36.048	35.8168		Alb	0.38185	0.0643511	1.30301	cellular response to starvation [GO:0009267]; maintenance of mitochondrion location [GO:0051659]; negative regulation of apoptotic process [GO:0043066]; positive regulation of circadian sleep/wake cycle, non-REM sleep [GO:0046010]; response to mercury ion [GO:0046689]; response to nutrient [GO:0007584]; response to organic substance [GO:0010033]; response to platinum ion [GO:0070541]; vasodilatio…	basement membrane [GO:0005604]; cytoplasm [GO:0005737]; extracellular exosome [GO:0070062]; extracellular region [GO:0005576]; extracellular space [GO:0005615]; protein-containing complex [GO:0032991]
P07861	Mme	26.614	25.8296	26.3368	27.5834	27.2829	26.0402	28.1555	29.4039	27.9715	29.5264		Mme	1.49017	0.0674591	2.80922	aging [GO:0007568]; amyloid-beta clearance [GO:0097242]; amyloid-beta clearance by cellular catabolic process [GO:0150094]; amyloid-beta metabolic process [GO:0050435]; cellular response to cytokine stimulus [GO:0071345]; cellular response to UV-A [GO:0071492]; cellular response to UV-B [GO:0071493]; creatinine metabolic process [GO:0046449]; kidney development [GO:0001822]; learning or memory [G…	axon [GO:0030424]; brush border [GO:0005903]; cytoplasm [GO:0005737]; cytoplasmic vesicle [GO:0031410]; dendrite [GO:0030425]; early endosome [GO:0005769]; integral component of membrane [GO:0016021]; membrane [GO:0016020]; membrane raft [GO:0045121]; neuronal cell body [GO:0043025]; neuron projection terminus [GO:0044306]; plasma membrane [GO:0005886]; presynapse [GO:0098793]; synapse [GO:004520…
P32038	Cfd	26.8704	26.4317	27.411	27.8065	26.6206	26.3042	25.83	26.6447	26.983	26.1773		Cfd	-0.640214	0.0825021	1.55856	complement activation, alternative pathway [GO:0006957]; Notch signaling pathway [GO:0007219]; response to bacterium [GO:0009617]; retina development in camera-type eye [GO:0060041]; vascular associated smooth muscle cell differentiation [GO:0035886]	extracellular space [GO:0005615]
P50137	Tkt	22.6733	22.0161	23.0813	22.0378	22.3197	28.866	22.457	28.8628	22.6095	23.5731		Tkt	2.84803	0.0927212	7.20017	glyceraldehyde-3-phosphate biosynthetic process [GO:0046166]; pentose-phosphate shunt [GO:0006098]; pentose-phosphate shunt, non-oxidative branch [GO:0009052]; regulation of growth [GO:0040008]; ribose phosphate biosynthetic process [GO:0046390]	endoplasmic reticulum membrane [GO:0005789]; intracellular membrane-bounded organelle [GO:0043231]; peroxisome [GO:0005777]
P00758	Ngfg	32.2711	31.9725	32.6888	30.8846	32.0813	30.7114	31.3719	29.2054	31.7245	31.6519		Ngfg	-1.04666	0.0961803	2.06574	regulation of systemic arterial blood pressure [GO:0003073]; zymogen activation [GO:0031638]	secretory granule [GO:0030141]
P04916	Rbp4	25.9438	25.4484	25.4227	25.4352	25.3415	25.417	25.1801	25.5746	24.4725	24.8645		Rbp4	-0.416589	0.101525	1.33477	cardiac muscle tissue development [GO:0048738]; detection of light stimulus involved in visual perception [GO:0050908]; embryonic organ morphogenesis [GO:0048562]; embryonic retina morphogenesis in camera-type eye [GO:0060059]; embryonic skeletal system development [GO:0048706]; eye development [GO:0001654]; female genitalia morphogenesis [GO:0048807]; gluconeogenesis [GO:0006094]; glucose homeos…	extracellular space [GO:0005615]; protein-containing complex [GO:0032991]
P08649	C4	25.68	26.8906	25.3601	25.0753	26.1685	27.9892	25.9021	27.2889	26.4155	26.1652		C4	0.917256	0.105408	1.88852	complement activation [GO:0006956]; complement activation, classical pathway [GO:0006958]; inflammatory response [GO:0006954]; innate immune response [GO:0045087]; positive regulation of apoptotic cell clearance [GO:2000427]	axon [GO:0030424]; dendrite [GO:0030425]; extracellular region [GO:0005576]; extracellular space [GO:0005615]; neuronal cell body [GO:0043025]; synapse [GO:0045202]
P18292	F2	27.9126	28.0599	28.5029	28.9529	27.2184	28.0439	27.5509	27.5538	27.5866	26.7165		F2	-0.639001	0.11558	1.55725	acute-phase response [GO:0006953]; antimicrobial humoral immune response mediated by antimicrobial peptide [GO:0061844]; blood coagulation [GO:0007596]; cell surface receptor signaling pathway [GO:0007166]; cellular response to mechanical stimulus [GO:0071260]; cytolysis by host of symbiont cells [GO:0051838]; fibrinolysis [GO:0042730]; negative regulation of astrocyte differentiation [GO:0048712…	collagen-containing extracellular matrix [GO:0062023]; extracellular space [GO:0005615]
P28826	Mep1b	27.918	27.9744	28.2089	29.2653	27.9899	27.2303	28.2813	27.5482	27.7922	27.8274		Mep1b	-0.535431	0.119217	1.44937	inflammatory response [GO:0006954]; proteolysis [GO:0006508]; toxin transport [GO:1901998]	extracellular region [GO:0005576]; integral component of plasma membrane [GO:0005887]; membrane [GO:0016020]; meprin A complex [GO:0017090]
P47967	Lgals5	26.0829	26.3272	26.3818	26.2076	25.7635	25.0958	25.4511	26.9933	24.6896	24.946		Lgals5	-0.717415	0.128423	1.64423	negative regulation of CD4-positive, alpha-beta T cell proliferation [GO:2000562]; negative regulation of interferon-gamma production [GO:0032689]; positive regulation of gene expression [GO:0010628]; positive regulation of T cell apoptotic process [GO:0070234]	cytosol [GO:0005829]; nucleus [GO:0005634]
Q62930	C9	25.5545	26.0844	26.0678	25.6186	26.697	27.149	25.9266	26.6407	27.3072	25.9536		C9	0.590983	0.13421	1.50627	blood coagulation [GO:0007596]; cell killing [GO:0001906]; complement activation, alternative pathway [GO:0006957]; complement activation, classical pathway [GO:0006958]; cytolysis [GO:0019835]; protein homooligomerization [GO:0051260]	extracellular space [GO:0005615]; membrane attack complex [GO:0005579]; plasma membrane [GO:0005886]
P14740	Dpp4	29.351	29.3628	29.2258	30.1882	29.3676	28.7889	29.4053	28.7171	29.2846	29.3909		Dpp4	-0.381735	0.136067	1.30291	B-1a B cell differentiation [GO:0002337]; behavioral fear response [GO:0001662]; cell adhesion [GO:0007155]; endothelial cell migration [GO:0043542]; establishment of localization [GO:0051234]; locomotory exploration behavior [GO:0035641]; negative regulation of extracellular matrix disassembly [GO:0010716]; negative regulation of neutrophil chemotaxis [GO:0090024]; positive regulation of cell po…	apical plasma membrane [GO:0016324]; cell surface [GO:0009986]; endocytic vesicle [GO:0030139]; endoplasmic reticulum [GO:0005783]; extracellular region [GO:0005576]; Golgi apparatus [GO:0005794]; integral component of membrane [GO:0016021]; intercellular canaliculus [GO:0046581]; lamellipodium [GO:0030027]; lamellipodium membrane [GO:0031258]; membrane raft [GO:0045121]; plasma membrane [GO:0005…
Q03626	Mug1	27.381	29.3904	27.5345	27.2096	28.0845	29.851	28.3374	28.7881	28.4855	28.1495		Mug1	0.802273	0.145258	1.74385	acute-phase response [GO:0006953]; embryo implantation [GO:0007566]; inflammatory response [GO:0006954]	extracellular space [GO:0005615]
Q68FP1-2	Gsn	29.0791	29.1555	29.3336	30.1533	29.6678	29.1589	28.97	28.5737	29.5779	29.0722		Gsn	-0.407352	0.148518	1.32625	actin cytoskeleton organization [GO:0030036]; actin filament capping [GO:0051693]; actin filament depolymerization [GO:0030042]; actin filament polymerization [GO:0030041]; actin filament reorganization [GO:0090527]; actin filament severing [GO:0051014]; actin nucleation [GO:0045010]; actin polymerization or depolymerization [GO:0008154]; aging [GO:0007568]; amyloid fibril formation [GO:1990000];…	actin cap [GO:0030478]; actin cytoskeleton [GO:0015629]; cortical actin cytoskeleton [GO:0030864]; cytoplasm [GO:0005737]; cytosol [GO:0005829]; extracellular region [GO:0005576]; extracellular space [GO:0005615]; lamellipodium [GO:0030027]; myelin sheath [GO:0043209]; perinuclear region of cytoplasm [GO:0048471]; phagocytic vesicle [GO:0045335]; plasma membrane [GO:0005886]; podosome [GO:0002102…
P19112	Fbp1	26.9077	25.7879	26.3954	25.3949	25.8507	25.2464	25.8933	25.7879	25.4685	25.6515		Fbp1	-0.457812	0.150368	1.37346	carbohydrate metabolic process [GO:0005975]; cellular response to insulin stimulus [GO:0032869]; cellular response to magnesium ion [GO:0071286]; cellular response to xenobiotic stimulus [GO:0071466]; dephosphorylation [GO:0016311]; fructose 1,6-bisphosphate metabolic process [GO:0030388]; fructose 6-phosphate metabolic process [GO:0006002]; fructose metabolic process [GO:0006000]; gluconeogenesi…	cytoplasm [GO:0005737]; cytosol [GO:0005829]; nucleus [GO:0005634]
P62986	Uba52;Rps27a;Ubb;Ubc	27.263	26.8803	27.7507	27.8584	27.5356	26.9066	27.2669	27.1715	27.2032	27.2504		Uba52;Rps27a;Ubb;Ubc	-0.297885	0.152436	1.22934	modification-dependent protein catabolic process [GO:0019941]; protein ubiquitination [GO:0016567]; response to insecticide [GO:0017085]; translation [GO:0006412]	cytoplasm [GO:0005737]; cytosolic large ribosomal subunit [GO:0022625]; cytosolic ribosome [GO:0022626]; cytosolic small ribosomal subunit [GO:0022627]; nucleus [GO:0005634]; synapse [GO:0045202]
P02680-2	Fgg	22.6346	29.0706	22.4959	21.5681	23.5373	29.2902	26.6033	28.1727	23.8958	24.6324		Fgg	2.65757	0.153235	6.30968	blood coagulation, fibrin clot formation [GO:0072378]; cell-matrix adhesion [GO:0007160]; cellular response to interleukin-1 [GO:0071347]; cellular response to interleukin-6 [GO:0071354]; fibrinolysis [GO:0042730]; negative regulation of endothelial cell apoptotic process [GO:2000352]; negative regulation of extrinsic apoptotic signaling pathway via death domain receptors [GO:1902042]; negative r…	blood microparticle [GO:0072562]; cell cortex [GO:0005938]; cell surface [GO:0009986]; collagen-containing extracellular matrix [GO:0062023]; cytoplasm [GO:0005737]; external side of plasma membrane [GO:0009897]; extracellular space [GO:0005615]; fibrinogen complex [GO:0005577]; platelet alpha granule [GO:0031091]; synapse [GO:0045202]
P09034	Ass1	24.6175	23.9272	24.1279	24.3692	23.5853	22.7863	23.1971	23.8118	23.2493	24.6688		Ass1	-0.582768	0.154726	1.49772	acute-phase response [GO:0006953]; aging [GO:0007568]; arginine biosynthetic process [GO:0006526]; argininosuccinate metabolic process [GO:0000053]; aspartate metabolic process [GO:0006531]; cellular response to amine stimulus [GO:0071418]; cellular response to amino acid stimulus [GO:0071230]; cellular response to ammonium ion [GO:0071242]; cellular response to cAMP [GO:0071320]; cellular respon…	cell body fiber [GO:0070852]; cytoplasm [GO:0005737]; cytosol [GO:0005829]; endoplasmic reticulum [GO:0005783]; lysosome [GO:0005764]; mitochondrial outer membrane [GO:0005741]; mitochondrion [GO:0005739]; neuronal cell body [GO:0043025]; neuron projection [GO:0043005]; nucleoplasm [GO:0005654]; nucleus [GO:0005634]; perikaryon [GO:0043204]
P02764	Orm1	28.7859	29.2099	28.9367	29.6302	29.3111	28.6974	29.0226	28.5736	28.8066	29.2673		Orm1	-0.301227	0.15544	1.23219	acute inflammatory response to antigenic stimulus [GO:0002438]; acute-phase response [GO:0006953]; animal organ regeneration [GO:0031100]; cellular response to glucocorticoid stimulus [GO:0071385]; cellular response to growth hormone stimulus [GO:0071378]; cellular response to retinoic acid [GO:0071300]; chronic inflammatory response to antigenic stimulus [GO:0002439]; negative regulation of inte…	extracellular space [GO:0005615]
P13635	Cp	28.4676	29.2154	28.1432	29.7822	29.4127	30.2812	28.8866	29.8186	29.4421	29.5458		Cp	0.590635	0.159136	1.50591	aging [GO:0007568]; cellular iron ion homeostasis [GO:0006879]; female pregnancy [GO:0007565]; iron ion homeostasis [GO:0055072]; iron ion transport [GO:0006826]; lactation [GO:0007595]; liver development [GO:0001889]; lung development [GO:0030324]; mammary gland involution [GO:0060056]; plasma membrane copper ion transport [GO:0015679]; response to copper ion [GO:0046688]; response to nutrient […	anchored component of plasma membrane [GO:0046658]; extracellular space [GO:0005615]; plasma membrane [GO:0005886]
Q9WTW7	Slc23a1	25.1953	25.2417	24.9073	26.2111	25.1712	24.9184	25.3785	24.4706	24.7726	25.0859		Slc23a1	-0.420141	0.159343	1.33806	brain development [GO:0007420]; dehydroascorbic acid transport [GO:0070837]; L-ascorbic acid transmembrane transport [GO:0015882]; lung development [GO:0030324]; response to toxic substance [GO:0009636]; sodium ion transport [GO:0006814]; transepithelial L-ascorbic acid transport [GO:0070904]	apical plasma membrane [GO:0016324]; basal plasma membrane [GO:0009925]; brush border [GO:0005903]; cytoplasm [GO:0005737]; integral component of plasma membrane [GO:0005887]; intracellular organelle [GO:0043229]; plasma membrane [GO:0005886]
P30152	Lcn2	26.7546	26.7565	27.4333	26.006	27.8726	27.778	26.6033	29.0534	27.3474	27.9716		Lcn2	0.78614	0.164409	1.72445	acute-phase response [GO:0006953]; cellular response to amyloid-beta [GO:1904646]; cellular response to hydrogen peroxide [GO:0070301]; cellular response to increased oxygen levels [GO:0036295]; cellular response to interleukin-1 [GO:0071347]; cellular response to interleukin-6 [GO:0071354]; cellular response to lipopolysaccharide [GO:0071222]; cellular response to nerve growth factor stimulus [G…	cytoplasm [GO:0005737]; cytoplasmic vesicle lumen [GO:0060205]; cytosol [GO:0005829]; extracellular region [GO:0005576]; extracellular space [GO:0005615]
P36953	Afm	29.4241	29.4363	29.2508	30.5214	29.4329	30.1979	29.5521	30.246	30.3804	29.7634		Afm	0.414854	0.174843	1.33316	protein stabilization [GO:0050821]; protein transport within extracellular region [GO:0071693]; vitamin transport [GO:0051180]	cytoplasm [GO:0005737]; extracellular space [GO:0005615]
P27274	Cd59	28.7943	28.8958	29.0527	28.1319	28.0477	28.1975	28.4375	28.2747	28.5026	27.5089		Cd59	-0.400241	0.179823	1.31973	negative regulation of activation of membrane attack complex [GO:0001971]; negative regulation of apoptotic process [GO:0043066]; negative regulation of complement activation [GO:0045916]; negative regulation of complement-dependent cytotoxicity [GO:1903660]; positive regulation of T cell proliferation [GO:0042102]; regulation of complement activation [GO:0030449]; regulation of complement-depend…	anchored component of external side of plasma membrane [GO:0031362]; cell surface [GO:0009986]; compact myelin [GO:0043218]; extracellular space [GO:0005615]; plasma membrane [GO:0005886]; sarcolemma [GO:0042383]
P52759	Hrsp12	26.9068	26.5134	26.4871	27.2604	25.972	26.0108	26.5029	26.3084	26.6389	25.5709		Hrsp12	-0.421563	0.18254	1.33938	brain development [GO:0007420]; G1 to G0 transition [GO:0070314]; kidney development [GO:0001822]; lipid metabolic process [GO:0006629]; lung development [GO:0030324]; mRNA catabolic process [GO:0006402]; mRNA destabilization [GO:0061157]; negative regulation of epithelial cell proliferation [GO:0050680]; negative regulation of translation [GO:0017148]; organonitrogen compound catabolic process […	cytoplasm [GO:0005737]; cytosol [GO:0005829]; mitochondrial matrix [GO:0005759]; mitochondrion [GO:0005739]; nucleus [GO:0005634]; peroxisome [GO:0005777]
P01835	P01835	33.4734	33.3266	33.9343	32.6878	33.5915	33.0267	33.1428	33.3718	32.9223	32.9402		P01835	-0.321948	0.183206	1.25002	regulation of immune response [GO:0050776]
Q6AYS7	Acy1a	25.0728	25.9066	25.0696	25.7479	24.8301	24.3917	24.7611	25.5215	24.9593	24.9596		Acy1a	-0.406766	0.183373	1.32571	cellular amino acid metabolic process [GO:0006520]; protein catabolic process [GO:0030163]	cytoplasm [GO:0005737]; extracellular exosome [GO:0070062]
P20761	Igh-1a	26.0483	27.7096	26.0464	25.7469	27.0349	28.7427	26.4832	28.5036	27.0113	26.2277		Igh-1a	0.876467	0.206021	1.83587	B cell receptor signaling pathway [GO:0050853]; complement activation, classical pathway [GO:0006958]; defense response to bacterium [GO:0042742]; innate immune response [GO:0045087]; phagocytosis, engulfment [GO:0006911]; phagocytosis, recognition [GO:0006910]; positive regulation of B cell activation [GO:0050871]	external side of plasma membrane [GO:0009897]; immunoglobulin complex, circulating [GO:0042571]
P81827	P81827	33.6631	33.2501	33.2897	32.82	31.7723	33.16	33.5849	28.5821	31.775	31.4552		P81827	-1.2476	0.220062	2.37445		extracellular region [GO:0005576]
P10960	Psap	26.0515	25.9993	26.5269	26.5905	25.8808	26.2815	26.0657	25.6908	26.1379	25.5346		Psap	-0.267668	0.22304	1.20386	adenylate cyclase-inhibiting G protein-coupled receptor signaling pathway [GO:0007193]; antigen processing and presentation [GO:0019882]; cellular response to organic substance [GO:0071310]; ceramide metabolic process [GO:0006672]; cerebellar Purkinje cell differentiation [GO:0021702]; cochlea development [GO:0090102]; corneocyte development [GO:0003335]; cornified envelope assembly [GO:1903575];…	aggresome [GO:0016235]; cytoplasm [GO:0005737]; extracellular region [GO:0005576]; extracellular space [GO:0005615]; late endosome [GO:0005770]; lysosome [GO:0005764]
P26644	Apoh	25.2364	26.7812	25.4183	25.5227	25.7822	27.2826	25.7309	27.463	26.7948	25.0101		Apoh	0.708107	0.229241	1.63366	aging [GO:0007568]; animal organ regeneration [GO:0031100]; blood coagulation [GO:0007596]; blood coagulation, intrinsic pathway [GO:0007597]; negative regulation of angiogenesis [GO:0016525]; negative regulation of blood coagulation [GO:0030195]; negative regulation of endothelial cell migration [GO:0010596]; negative regulation of endothelial cell proliferation [GO:0001937]; negative regulation…	cell surface [GO:0009986]; chylomicron [GO:0042627]; cytoplasm [GO:0005737]; extracellular space [GO:0005615]; high-density lipoprotein particle [GO:0034364]; plasma membrane [GO:0005886]; very-low-density lipoprotein particle [GO:0034361]
P20760	Igg-2a	30.7954	31.6226	31.5109	29.7871	31.5362	32.4903	31.007	31.6349	31.3722	31.5068		Igg-2a	0.551812	0.232094	1.46593	B cell receptor signaling pathway [GO:0050853]; complement activation, classical pathway [GO:0006958]; defense response to bacterium [GO:0042742]; innate immune response [GO:0045087]; phagocytosis, engulfment [GO:0006911]; phagocytosis, recognition [GO:0006910]; positive regulation of B cell activation [GO:0050871]	external side of plasma membrane [GO:0009897]; immunoglobulin complex, circulating [GO:0042571]
Q9JJ19	Slc9a3r1	27.9798	28.2018	28.9576	29.7355	28.4384	26.8189	28.3322	27.9454	28.7674	28.478		Slc9a3r1	-0.594248	0.234355	1.50969	actin cytoskeleton organization [GO:0030036]; adenylate cyclase-activating dopamine receptor signaling pathway [GO:0007191]; auditory receptor cell stereocilium organization [GO:0060088]; bile acid secretion [GO:0032782]; cellular phosphate ion homeostasis [GO:0030643]; cellular protein localization [GO:0034613]; cerebrospinal fluid circulation [GO:0090660]; cilium organization [GO:0044782]; esta…	apical part of cell [GO:0045177]; apical plasma membrane [GO:0016324]; brush border membrane [GO:0031526]; cell periphery [GO:0071944]; cytoplasm [GO:0005737]; endomembrane system [GO:0012505]; extracellular region [GO:0005576]; filopodium [GO:0030175]; membrane [GO:0016020]; membrane raft [GO:0045121]; microvillus [GO:0005902]; microvillus membrane [GO:0031528]; perinuclear region of cytoplasm […
P31211	Serpina6	27.5171	27.8569	27.545	28.6915	27.9772	27.4244	27.3386	27.2465	27.8025	28.1053		Serpina6	-0.334057	0.246027	1.26055	glucocorticoid metabolic process [GO:0008211]; negative regulation of endopeptidase activity [GO:0010951]	extracellular space [GO:0005615]
P22057	Ptgds	29.6901	29.294	30.1741	29.4996	30.063	28.677	29.1498	29.6276	29.9365	29.621		Ptgds	-0.341788	0.250998	1.26733	mast cell degranulation [GO:0043303]; negative regulation of male germ cell proliferation [GO:2000255]; prostaglandin biosynthetic process [GO:0001516]; regulation of circadian sleep/wake cycle, sleep [GO:0045187]; response to glucocorticoid [GO:0051384]	extracellular region [GO:0005576]; extracellular space [GO:0005615]; Golgi apparatus [GO:0005794]; nuclear envelope [GO:0005635]; nuclear membrane [GO:0031965]; perinuclear region of cytoplasm [GO:0048471]; rough endoplasmic reticulum [GO:0005791]
P01026	C3	28.0987	30.6166	28.7008	26.5034	30.2361	31.4875	29.6535	31.1119	29.0886	28.4709		C3	1.13136	0.265538	2.19066	amyloid-beta clearance [GO:0097242]; blood coagulation [GO:0007596]; cell surface receptor signaling pathway involved in cell-cell signaling [GO:1905114]; chemotaxis [GO:0006935]; complement activation [GO:0006956]; complement activation, alternative pathway [GO:0006957]; complement activation, classical pathway [GO:0006958]; complement-dependent cytotoxicity [GO:0097278]; complement-mediated syn…	cell surface [GO:0009986]; extracellular region [GO:0005576]; extracellular space [GO:0005615]; protein-containing complex [GO:0032991]
P00689	Amy2	31.7913	31.9643	32.3637	31.8187	32.4194	31.1008	31.8709	31.2181	32.6213	31.8054		Amy2	-0.348136	0.283983	1.27292	carbohydrate catabolic process [GO:0016052]	extracellular space [GO:0005615]
P48199	Crp	28.8967	29.3014	29.447	25.7962	29.3782	29.4417	29.7397	29.523	28.7011	29.4126		Crp	0.79976	0.299012	1.74081	acute-phase response [GO:0006953]; aging [GO:0007568]; cellular response to calcium ion [GO:0071277]; cellular response to interleukin-6 [GO:0071354]; cellular response to nitric oxide [GO:0071732]; complement activation, classical pathway [GO:0006958]; innate immune response [GO:0045087]; negative regulation by host of viral process [GO:0044793]; negative regulation of lipid storage [GO:0010888]…	extracellular space [GO:0005615]; filopodium [GO:0030175]; growth cone [GO:0030426]
P62804	Hist1h4b	28.3755	27.3848	27.0524	25.8104	27.8454	28.1302	27.2306	29.1777	27.2278	27.7578		Hist1h4b	0.611146	0.309583	1.52747	cell differentiation [GO:0030154]; DNA replication-dependent chromatin assembly [GO:0006335]; DNA replication-independent chromatin assembly [GO:0006336]; DNA-templated transcription, initiation [GO:0006352]; negative regulation of megakaryocyte differentiation [GO:0045653]; nucleosome assembly [GO:0006334]; ossification [GO:0001503]	CENP-A containing nucleosome [GO:0043505]; extracellular region [GO:0005576]; nuclear chromosome [GO:0000228]; nucleoplasm [GO:0005654]; nucleosome [GO:0000786]; nucleus [GO:0005634]; protein-containing complex [GO:0032991]
P05371	Clu	26.8564	27.5913	26.7256	29.0662	27.5272	26.8928	26.1343	27.0278	27.3144	27.7271		Clu	-0.534045	0.309708	1.44798	aging [GO:0007568]; cell morphogenesis [GO:0000902]; cellular response to growth factor stimulus [GO:0071363]; central nervous system myelin maintenance [GO:0032286]; chaperone-mediated protein complex assembly [GO:0051131]; chaperone-mediated protein folding [GO:0061077]; endocrine pancreas development [GO:0031018]; estrous cycle [GO:0044849]; immune complex clearance [GO:0002434]; intrinsic apo…	aggresome [GO:0016235]; apical dendrite [GO:0097440]; cell surface [GO:0009986]; chromaffin granule [GO:0042583]; cytoplasm [GO:0005737]; cytosol [GO:0005829]; extracellular space [GO:0005615]; growth cone [GO:0030426]; intracellular membrane-bounded organelle [GO:0043231]; mitochondrial inner membrane [GO:0005743]; mitochondrion [GO:0005739]; neurofibrillary tangle [GO:0097418]; neuron projectio…
P20767	P20767	29.7451	29.0201	30.4285	29.5807	29.6677	29.6032	29.1159	29.4956	29.6703	29.2325		P20767	-0.264917	0.318256	1.20157	B cell receptor signaling pathway [GO:0050853]; complement activation, classical pathway [GO:0006958]; defense response to bacterium [GO:0042742]; innate immune response [GO:0045087]; phagocytosis, engulfment [GO:0006911]; phagocytosis, recognition [GO:0006910]; positive regulation of B cell activation [GO:0050871]	external side of plasma membrane [GO:0009897]; immunoglobulin complex, circulating [GO:0042571]
P07647	Klk9	30.1918	28.382	29.4142	31.0412	29.577	27.9482	30.8027	33.1894	29.9651	31.8027		Klk9	1.02039	0.330472	2.02847	positive regulation of vasoconstriction [GO:0045907]; regulation of systemic arterial blood pressure [GO:0003073]; zymogen activation [GO:0031638]	secretory granule [GO:0030141]
Q64319	Slc3a1	28.914	28.5145	28.8714	29.8015	28.9513	28.2608	29.1026	27.7727	29.0181	29.1165		Slc3a1	-0.356383	0.332052	1.28021	amino acid transport [GO:0006865]; aspartate transmembrane transport [GO:0015810]; carbohydrate metabolic process [GO:0005975]; gene expression [GO:0010467]; L-cystine transport [GO:0015811]; L-glutamate transmembrane transport [GO:0015813]	apical plasma membrane [GO:0016324]; brush border membrane [GO:0031526]; integral component of plasma membrane [GO:0005887]; plasma membrane [GO:0005886]; vacuolar membrane [GO:0005774]
Q63556	Serpina3m	25.3575	25.9896	25.7649	26.1433	26.145	26.7535	25.6754	25.8264	26.6447	25.8626		Serpina3m	0.272443	0.342704	1.20785	negative regulation of endopeptidase activity [GO:0010951]	extracellular space [GO:0005615]
P00884	Aldob	26.3537	26.0578	26.7175	27.2341	26.3169	24.9829	26.1393	26.2137	26.7468	26.6974		Aldob	-0.379977	0.34378	1.30132	cellular response to extracellular stimulus [GO:0031668]; cellular response to insulin stimulus [GO:0032869]; fructose 1,6-bisphosphate metabolic process [GO:0030388]; fructose metabolic process [GO:0006000]; glycolytic process [GO:0006096]; liver development [GO:0001889]; NADH oxidation [GO:0006116]; positive regulation of ATP-dependent activity [GO:0032781]; response to amino acid [GO:0043200];…	centriolar satellite [GO:0034451]; cytoplasm [GO:0005737]; cytosol [GO:0005829]; intracellular membrane-bounded organelle [GO:0043231]; lysosome [GO:0005764]; microtubule organizing center [GO:0005815]; nucleus [GO:0005634]; perinuclear region of cytoplasm [GO:0048471]; plasma membrane [GO:0005886]; rough endoplasmic reticulum membrane [GO:0030867]; smooth endoplasmic reticulum membrane [GO:00308…
P14480	Fgb	23.4026	28.7018	22.4513	22.58	23.8918	29.5554	25.0282	27.344	23.4118	23.7383		Fgb	1.61003	0.35466	3.05258	adaptive immune response [GO:0002250]; blood coagulation, fibrin clot formation [GO:0072378]; cell adhesion [GO:0007155]; cell-matrix adhesion [GO:0007160]; cellular response to interleukin-1 [GO:0071347]; cellular response to leptin stimulus [GO:0044320]; fibrinolysis [GO:0042730]; induction of bacterial agglutination [GO:0043152]; innate immune response [GO:0045087]; negative regulation of endo…	blood microparticle [GO:0072562]; cell cortex [GO:0005938]; cell surface [GO:0009986]; collagen-containing extracellular matrix [GO:0062023]; cytoplasm [GO:0005737]; endoplasmic reticulum [GO:0005783]; external side of plasma membrane [GO:0009897]; extracellular space [GO:0005615]; fibrinogen complex [GO:0005577]; platelet alpha granule [GO:0031091]; synapse [GO:0045202]
P04276	Gc	27.1976	28.0915	27.5914	27.4885	27.7698	29.6995	27.8783	27.9254	28.5897	26.6101		Gc	0.512844	0.357997	1.42686	female pregnancy [GO:0007565]; lactation [GO:0007595]; response to estradiol [GO:0032355]; response to nutrient levels [GO:0031667]; response to steroid hormone [GO:0048545]; vitamin D metabolic process [GO:0042359]	axon [GO:0030424]; cytoplasm [GO:0005737]; cytosol [GO:0005829]; extracellular space [GO:0005615]; perinuclear region of cytoplasm [GO:0048471]
P05545	Serpina3k	32.0949	32.0705	32.5936	32.1717	32.5707	31.6753	32.276	32.1017	32.2285	32.4096		Serpina3k	-0.162077	0.371836	1.1189	negative regulation of endopeptidase activity [GO:0010951]	extracellular space [GO:0005615]
P07314	Ggt1	29.1476	29.3635	29.5367	29.714	29.8403	28.5294	29.5961	29.1802	29.7639	29.3661		Ggt1	-0.233263	0.372269	1.17549	aging [GO:0007568]; cellular amino acid metabolic process [GO:0006520]; cellular response to oxidative stress [GO:0034599]; cysteine biosynthetic process [GO:0019344]; fatty acid metabolic process [GO:0006631]; glutamate metabolic process [GO:0006536]; glutathione biosynthetic process [GO:0006750]; glutathione catabolic process [GO:0006751]; hepatoblast differentiation [GO:0061017]; hepatocyte di…	extracellular space [GO:0005615]; integral component of plasma membrane [GO:0005887]; plasma membrane [GO:0005886]; vesicle [GO:0031982]
P27590	Umod	30.8837	30.6969	30.4452	30.1689	30.5797	30.2979	32.4974	30.3714	30.6875	30.8321		Umod	0.382364	0.389129	1.30348	apoptotic process [GO:0006915]; apoptotic signaling pathway [GO:0097190]; autophagy [GO:0006914]; calcium ion homeostasis [GO:0055074]; cellular calcium ion homeostasis [GO:0006874]; cellular chloride ion homeostasis [GO:0030644]; cellular phosphate ion homeostasis [GO:0030643]; cellular response to unfolded protein [GO:0034620]; cellular sodium ion homeostasis [GO:0006883]; chaperone-mediated pr…	anchored component of membrane [GO:0031225]; apical part of cell [GO:0045177]; apical plasma membrane [GO:0016324]; basolateral plasma membrane [GO:0016323]; cell surface [GO:0009986]; ciliary membrane [GO:0060170]; cilium [GO:0005929]; cytoplasmic vesicle [GO:0031410]; endoplasmic reticulum [GO:0005783]; extracellular space [GO:0005615]; Golgi apparatus [GO:0005794]; membrane raft [GO:0045121]; …
Q00657	Cspg4	27.9842	28.0001	27.8387	27.0607	27.8676	27.7551	27.5752	27.0954	27.3512	27.9552		Cspg4	-0.203866	0.403222	1.15178	angiogenesis [GO:0001525]; cell population proliferation [GO:0008283]; glial cell migration [GO:0008347]; inflammatory response [GO:0006954]; intracellular signal transduction [GO:0035556]; negative regulation of neuron projection development [GO:0010977]; neuron remodeling [GO:0016322]; platelet-derived growth factor receptor signaling pathway [GO:0048008]; positive regulation of MAPK cascade [G…	apical plasma membrane [GO:0016324]; cell projection [GO:0042995]; cell surface [GO:0009986]; integral component of plasma membrane [GO:0005887]; lamellipodium membrane [GO:0031258]; plasma membrane [GO:0005886]; ruffle [GO:0001726]
P81828	P81828	33.0084	32.9792	32.9093	31.0333	31.9883	32.4248	32.6987	31.0615	32.156	31.4345		P81828	-0.428623	0.411033	1.34595		extracellular region [GO:0005576]
P31977	Ezr	27.7407	27.9228	28.3408	26.4895	28.0562	27.1426	28.0828	28.211	28.1332	28.7579		Ezr	0.355502	0.414375	1.27943	actin cytoskeleton reorganization [GO:0031532]; actin filament bundle assembly [GO:0051017]; astral microtubule organization [GO:0030953]; cellular response to cAMP [GO:0071320]; cortical microtubule organization [GO:0043622]; epithelial cell differentiation [GO:0030855]; establishment of centrosome localization [GO:0051660]; establishment of endothelial barrier [GO:0061028]; establishment or mai…	actin cytoskeleton [GO:0015629]; actin filament [GO:0005884]; adherens junction [GO:0005912]; apical part of cell [GO:0045177]; apical plasma membrane [GO:0016324]; astrocyte projection [GO:0097449]; basolateral plasma membrane [GO:0016323]; brush border [GO:0005903]; cell body [GO:0044297]; cell cortex [GO:0005938]; cell periphery [GO:0071944]; cell projection [GO:0042995]; cell tip [GO:0051286]…
P01048	Map1	28.3236	28.2422	28.6754	29.5603	28.8146	29.2122	28.7606	28.9137	29.4001	28.5141		Map1	0.236951	0.42654	1.1785	acute-phase response [GO:0006953]; negative regulation of blood coagulation [GO:0030195]; negative regulation of endopeptidase activity [GO:0010951]; positive regulation of cytosolic calcium ion concentration [GO:0007204]; vasodilation [GO:0042311]	extracellular region [GO:0005576]; extracellular space [GO:0005615]
Q4QQW8	Plbd2	24.0513	24.8096	24.4038	24.7647	25.2209	23.9063	24.5966	23.8913	25.3118	24.3116		Plbd2	-0.246528	0.475021	1.18635	phospholipid catabolic process [GO:0009395]	extracellular region [GO:0005576]; lysosomal lumen [GO:0043202]; lysosome [GO:0005764]
P02650	Apoe	28.108	29.1527	28.8123	28.8548	29.0539	28.8213	28.5819	28.0493	29.0945	28.4902		Apoe	-0.188924	0.476511	1.13991	aging [GO:0007568]; AMPA glutamate receptor clustering [GO:0097113]; amyloid precursor protein metabolic process [GO:0042982]; artery morphogenesis [GO:0048844]; cellular calcium ion homeostasis [GO:0006874]; cellular response to cholesterol [GO:0071397]; cellular response to ethanol [GO:0071361]; cellular response to growth factor stimulus [GO:0071363]; cellular response to interleukin-1 [GO:007…	cell surface [GO:0009986]; chylomicron [GO:0042627]; cytoplasm [GO:0005737]; dendrite [GO:0030425]; discoidal high-density lipoprotein particle [GO:0034365]; endoplasmic reticulum [GO:0005783]; endosome [GO:0005768]; extracellular matrix [GO:0031012]; extracellular region [GO:0005576]; extracellular space [GO:0005615]; extrinsic component of external side of plasma membrane [GO:0031232]; glutamat…
Q9QX79	Fetub	27.0513	27.8388	27.3313	26.8072	27.8547	28.3463	27.1403	27.6223	27.4278	27.4232		Fetub	0.21533	0.481719	1.16097	binding of sperm to zona pellucida [GO:0007339]; negative regulation of endopeptidase activity [GO:0010951]; single fertilization [GO:0007338]	extracellular region [GO:0005576]; extracellular space [GO:0005615]
P14046	A1i3	31.1717	32.3362	30.8909	30.7442	31.4999	32.8665	31.2627	31.8675	30.9106	31.3645		A1i3	0.325782	0.482157	1.25334		extracellular space [GO:0005615]
P21704	Dnase1	31.7259	32.0952	32.8976	30.8132	32.0423	31.2239	31.8689	31.5913	31.6151	31.9804		Dnase1	-0.25891	0.493691	1.19657	apoptotic process [GO:0006915]; DNA catabolic process [GO:0006308]; DNA catabolic process, endonucleolytic [GO:0000737]; neutrophil activation involved in immune response [GO:0002283]; regulation of acute inflammatory response [GO:0002673]; regulation of neutrophil mediated cytotoxicity [GO:0070948]	extracellular region [GO:0005576]; nuclear envelope [GO:0005635]; nucleus [GO:0005634]; zymogen granule [GO:0042588]
P63018	Hspa8	27.5737	26.407	27.2844	27.353	26.7908	26.0246	26.9334	27.3714	26.7307	27.2171		Hspa8	-0.226326	0.495101	1.16985	aging [GO:0007568]; ATP metabolic process [GO:0046034]; axo-dendritic transport [GO:0008088]; cellular response to cadmium ion [GO:0071276]; cellular response to heat [GO:0034605]; cellular response to unfolded protein [GO:0034620]; cerebellum development [GO:0021549]; chaperone cofactor-dependent protein refolding [GO:0051085]; chaperone-mediated autophagy [GO:0061684]; chaperone-mediated autoph…	asymmetric synapse [GO:0032279]; autophagosome [GO:0005776]; axon [GO:0030424]; cell surface [GO:0009986]; chaperone complex [GO:0101031]; cytoplasm [GO:0005737]; cytosol [GO:0005829]; dendrite [GO:0030425]; dendritic shaft [GO:0043198]; dendritic spine [GO:0043197]; extracellular exosome [GO:0070062]; glutamatergic synapse [GO:0098978]; glycinergic synapse [GO:0098690]; intermediate filament [GO…
O35763	Msn	26.4635	26.0151	26.7651	27.1281	26.5247	25.4546	25.9877	26.9811	26.7706	26.5353		Msn	-0.23344	0.502708	1.17563	cellular response to testosterone stimulus [GO:0071394]; establishment of endothelial barrier [GO:0061028]; establishment of epithelial cell apical/basal polarity [GO:0045198]; gland morphogenesis [GO:0022612]; immunological synapse formation [GO:0001771]; leukocyte cell-cell adhesion [GO:0007159]; leukocyte migration [GO:0050900]; membrane to membrane docking [GO:0022614]; positive regulation of…	adherens junction [GO:0005912]; apical part of cell [GO:0045177]; apical plasma membrane [GO:0016324]; basolateral plasma membrane [GO:0016323]; cell periphery [GO:0071944]; cell surface [GO:0009986]; cell tip [GO:0051286]; cytoplasmic side of plasma membrane [GO:0009898]; cytoskeleton [GO:0005856]; filopodium [GO:0030175]; filopodium membrane [GO:0031527]; microvillus [GO:0005902]; microvillus m…
P09006	Serpina3n	26.92	27.0374	27.1134	24.9509	27.8528	28.4018	26.9799	27.7551	25.5871	27.3612		Serpina3n	0.442098	0.531041	1.35858	cellular response to cAMP [GO:0071320]; cellular response to glucocorticoid stimulus [GO:0071385]; cellular response to interferon-gamma [GO:0071346]; cellular response to interleukin-1 [GO:0071347]; cellular response to interleukin-6 [GO:0071354]; inflammatory response [GO:0006954]; negative regulation of endopeptidase activity [GO:0010951]; response to bacterium [GO:0009617]; response to cytoki…	extracellular region [GO:0005576]; extracellular space [GO:0005615]
P02091	Hbb	28.6601	33.6838	26.2674	23.9024	27.1517	33.1831	32.1289	29.4242	25.549	26.6014		Hbb	1.44423	0.531699	2.72118	cellular oxidant detoxification [GO:0098869]; erythrocyte development [GO:0048821]; glutathione metabolic process [GO:0006749]; hemopoiesis [GO:0030097]; hydrogen peroxide catabolic process [GO:0042744]; nitric oxide transport [GO:0030185]; oxygen transport [GO:0015671]; positive regulation of cell death [GO:0010942]; regulation of eIF2 alpha phosphorylation by heme [GO:0010999]; renal absorption…	extracellular space [GO:0005615]; haptoglobin-hemoglobin complex [GO:0031838]; hemoglobin complex [GO:0005833]
P20059	Hpx	30.8466	31.3288	30.5951	30.9969	30.8725	32.0455	30.7883	31.0893	31.1382	30.4968		Hpx	0.183636	0.539485	1.13574	cellular iron ion homeostasis [GO:0006879]; heme metabolic process [GO:0042168]; hemoglobin metabolic process [GO:0020027]; positive regulation of humoral immune response mediated by circulating immunoglobulin [GO:0002925]; positive regulation of immunoglobulin production [GO:0002639]; positive regulation of interferon-gamma-mediated signaling pathway [GO:0060335]; positive regulation of response…	extracellular space [GO:0005615]
Q9EPB1	Dpp7	28.2395	28.6461	28.8432	28.0689	28.792	28.4	28.4718	28.5918	28.0395	28.5169		Dpp7	-0.113916	0.548671	1.08216	lysosomal protein catabolic process [GO:1905146]; protein catabolic process [GO:0030163]; proteolysis [GO:0006508]	cytoplasmic vesicle [GO:0031410]; cytosol [GO:0005829]; extracellular region [GO:0005576]; lysosome [GO:0005764]; vesicle [GO:0031982]
P29975	Aqp1	26.2207	26.3739	26.6877	28.3905	27.128	26.0331	27.0632	26.5948	27.3947	26.3386		Aqp1	-0.275267	0.566411	1.21022	ammonium transmembrane transport [GO:0072488]; camera-type eye morphogenesis [GO:0048593]; carbon dioxide transmembrane transport [GO:0035378]; carbon dioxide transport [GO:0015670]; cellular homeostasis [GO:0019725]; cellular hyperosmotic response [GO:0071474]; cellular response to cAMP [GO:0071320]; cellular response to copper ion [GO:0071280]; cellular response to dexamethasone stimulus [GO:00…	apical part of cell [GO:0045177]; apical plasma membrane [GO:0016324]; axon [GO:0030424]; axon terminus [GO:0043679]; basal plasma membrane [GO:0009925]; basolateral plasma membrane [GO:0016323]; brush border [GO:0005903]; brush border membrane [GO:0031526]; caveola [GO:0005901]; cytoplasm [GO:0005737]; extracellular exosome [GO:0070062]; integral component of membrane [GO:0016021]; membrane [GO:…
Q6IRK9	Cpq	29.2304	29.1631	29.6155	28.2353	29.5596	29.0173	29.3938	28.5639	30.0351	29.8534		Cpq	0.211929	0.578419	1.15824	peptide catabolic process [GO:0043171]; proteolysis [GO:0006508]; thyroid hormone generation [GO:0006590]; tissue regeneration [GO:0042246]	cytoplasm [GO:0005737]; endoplasmic reticulum [GO:0005783]; extracellular space [GO:0005615]; Golgi apparatus [GO:0005794]; lysosome [GO:0005764]
P05544	Serpina3l	32.6467	33.1192	32.938	32.0957	33.0704	32.7073	32.9289	32.8836	32.8055	33.1242		Serpina3l	0.115891	0.579897	1.08364	negative regulation of endopeptidase activity [GO:0010951]	extracellular space [GO:0005615]
Q9JJ40	Pdzk1	28.2854	28.6241	28.9121	28.2899	28.4323	26.9697	28.5179	27.82	29.0872	29.0388		Pdzk1	-0.222055	0.609554	1.16639	carnitine transport [GO:0015879]; cholesterol transport [GO:0030301]; intracellular transport [GO:0046907]; in utero embryonic development [GO:0001701]; positive regulation of cation transmembrane transport [GO:1904064]; positive regulation of ion transmembrane transporter activity [GO:0032414]; positive regulation of protein localization to membrane [GO:1905477]; positive regulation of protein t…	apical plasma membrane [GO:0016324]; brush border [GO:0005903]; brush border membrane [GO:0031526]; membrane raft [GO:0045121]; microvillus membrane [GO:0031528]; plasma membrane [GO:0005886]
P06866	Hp	26.7858	28.0765	27.2099	27.9442	28.3271	29.3053	27.7693	26.7471	28.2633	27.5711		Hp	0.262513	0.621323	1.19957	acute inflammatory response [GO:0002526]; acute-phase response [GO:0006953]; aging [GO:0007568]; animal organ regeneration [GO:0031100]; defense response to bacterium [GO:0042742]; immune system process [GO:0002376]; liver development [GO:0001889]; negative regulation of hydrogen peroxide catabolic process [GO:2000296]; negative regulation of oxidoreductase activity [GO:0051354]; Notch signaling …	blood microparticle [GO:0072562]; endoplasmic reticulum [GO:0005783]; extracellular space [GO:0005615]; Golgi apparatus [GO:0005794]; haptoglobin-hemoglobin complex [GO:0031838]
Q63041	A1m	31.8545	32.3826	31.8469	31.0119	31.8057	32.243	31.809	31.7639	31.7739	31.9004		A1m	0.117721	0.632874	1.08502	embryo implantation [GO:0007566]	extracellular space [GO:0005615]
O70513	Lgals3bp	25.3279	24.9698	24.8465	25.7079	25.0274	24.8834	24.8497	25.4167	25.1471	25.1436		Lgals3bp	-0.0877888	0.649677	1.06274	cell adhesion [GO:0007155]	extracellular space [GO:0005615]; membrane [GO:0016020]
P14841	Cst3	29.6084	28.9876	29.8433	25.6514	29.5065	29.0259	28.9604	28.7287	29.2279	29.3413		Cst3	0.337425	0.6794	1.2635	apoptotic process [GO:0006915]; brain development [GO:0007420]; cell activation [GO:0001775]; cellular response to hydrogen peroxide [GO:0070301]; cellular response to oxidative stress [GO:0034599]; circadian sleep/wake cycle, REM sleep [GO:0042747]; defense response [GO:0006952]; embryo implantation [GO:0007566]; eye development [GO:0001654]; male gonad development [GO:0008584]; negative regulat…	axon [GO:0030424]; basement membrane [GO:0005604]; cell projection [GO:0042995]; contractile fiber [GO:0043292]; cytoplasm [GO:0005737]; endoplasmic reticulum [GO:0005783]; extracellular region [GO:0005576]; extracellular space [GO:0005615]; Golgi apparatus [GO:0005794]; lysosome [GO:0005764]; multivesicular body [GO:0005771]; neuronal cell body [GO:0043025]; nuclear membrane [GO:0031965]; perinu…
P50123	Enpep	27.6157	27.6625	27.8796	26.9111	28.1035	27.3413	27.7663	27.3272	28.2442	28.0802		Enpep	0.117372	0.679912	1.08476	angiogenesis [GO:0001525]; cell migration [GO:0016477]; cell population proliferation [GO:0008283]; glomerulus development [GO:0032835]; peptide catabolic process [GO:0043171]; proteolysis [GO:0006508]; regulation of blood pressure [GO:0008217]; regulation of systemic arterial blood pressure by renin-angiotensin [GO:0003081]; signal transduction [GO:0007165]	apical part of cell [GO:0045177]; apical plasma membrane [GO:0016324]; brush border [GO:0005903]; brush border membrane [GO:0031526]; cytoplasm [GO:0005737]; cytoplasmic vesicle [GO:0031410]; external side of plasma membrane [GO:0009897]; integral component of membrane [GO:0016021]; plasma membrane [GO:0005886]
P15399-2	Pbsn	27.848	28.2293	27.3667	34.4848	25.8465	23.8431	30.7895	25.3654	29.1306	30.4086		Pbsn	-0.847613	0.688916	1.79952		extracellular space [GO:0005615]; nucleus [GO:0005634]
Q01460	Ctbs	26.8997	26.8345	26.9692	26.0724	27.6006	26.5922	26.8187	25.4797	27.2458	27.3894		Ctbs	-0.170085	0.693723	1.12512	chitin catabolic process [GO:0006032]; oligosaccharide catabolic process [GO:0009313]	lysosome [GO:0005764]
P98158	Lrp2	30.1173	30.0376	30.0189	29.2506	30.0893	29.9256	29.7622	29.4799	29.7494	30.1897		Lrp2	-0.0813831	0.696455	1.05803	aging [GO:0007568]; amyloid-beta clearance [GO:0097242]; animal organ regeneration [GO:0031100]; aorta development [GO:0035904]; cell population proliferation [GO:0008283]; cellular response to growth factor stimulus [GO:0071363]; chemoattraction of axon [GO:0061642]; coronary artery morphogenesis [GO:0060982]; coronary vasculature development [GO:0060976]; endocytic hemoglobin import into cell […	apical part of cell [GO:0045177]; apical plasma membrane [GO:0016324]; axon [GO:0030424]; axonal growth cone [GO:0044295]; brush border [GO:0005903]; brush border membrane [GO:0031526]; cell surface [GO:0009986]; clathrin-coated pit [GO:0005905]; cytoplasm [GO:0005737]; dendrite [GO:0030425]; endocytic vesicle [GO:0030139]; endoplasmic reticulum [GO:0005783]; endosome [GO:0005768]; endosome lumen…
P36373	Klk7	30.3343	30.73	30.717	28.1029	30.2515	30.2142	30.6771	30.3453	29.6318	30.297		Klk7	0.205943	0.70203	1.15344	positive regulation of antibacterial peptide production [GO:0002803]; regulation of systemic arterial blood pressure [GO:0003073]; zymogen activation [GO:0031638]	cornified envelope [GO:0001533]; epidermal lamellar body [GO:0097209]; extracellular space [GO:0005615]; secretory granule [GO:0030141]
P10252	Cd48	27.2697	27.7171	27.2264	24.8039	27.2018	26.3235	26.9164	26.6374	26.6725	26.6369		Cd48	-0.206434	0.705569	1.15383	mast cell activation [GO:0045576]; regulation of adaptive immune response [GO:0002819]; signal transduction [GO:0007165]; T cell activation [GO:0042110]	anchored component of plasma membrane [GO:0046658]; external side of plasma membrane [GO:0009897]; membrane raft [GO:0045121]; plasma membrane [GO:0005886]; protein-containing complex [GO:0032991]
P15083	Pigr	28.7322	28.241	28.4283	26.4106	28.4357	27.4683	28.0263	27.7157	28.0846	28.162		Pigr	-0.158165	0.7268	1.11587	detection of chemical stimulus involved in sensory perception of bitter taste [GO:0001580]; epidermal growth factor receptor signaling pathway [GO:0007173]; Fc receptor signaling pathway [GO:0038093]; immunoglobulin transcytosis in epithelial cells mediated by polymeric immunoglobulin receptor [GO:0002415]; receptor clustering [GO:0043113]	extracellular space [GO:0005615]; integral component of membrane [GO:0016021]; plasma membrane [GO:0005886]; receptor complex [GO:0043235]; recycling endosome membrane [GO:0055038]; secretory IgA immunoglobulin complex [GO:0071751]; transport vesicle [GO:0030133]
O55006	O55006	26.4973	26.7081	26.3198	24.8524	25.9103	26.8713	26.0676	26.0173	26.1883	25.7404		O55006	0.119388	0.760684	1.08627	bone remodeling [GO:0046849]	extracellular region [GO:0005576]
Q01177	Plg	29.4211	29.5672	29.3269	29.7086	29.7608	30.5413	29.289	29.5758	29.5994	29.1789		Plg	0.0799489	0.760962	1.05698	biological process involved in interaction with symbiont [GO:0051702]; blood coagulation [GO:0007596]; extracellular matrix disassembly [GO:0022617]; fibrinolysis [GO:0042730]; labyrinthine layer blood vessel development [GO:0060716]; mononuclear cell migration [GO:0071674]; muscle cell cellular homeostasis [GO:0046716]; myoblast differentiation [GO:0045445]; negative regulation of cell-substrate…	cell surface [GO:0009986]; extracellular space [GO:0005615]; extrinsic component of external side of plasma membrane [GO:0031232]; extrinsic component of plasma membrane [GO:0019897]; glutamatergic synapse [GO:0098978]; intracellular membrane-bounded organelle [GO:0043231]; plasma membrane [GO:0005886]; Schaffer collateral - CA1 synapse [GO:0098685]
P08289	Alpl	23.6676	22.8304	23.7127	24.2882	23.8006	22.5583	23.9485	23.9304	23.2778	24.0086		Alpl	-0.115167	0.76097	1.0831	biomineralization [GO:0110148]; bone mineralization [GO:0030282]; calcium ion homeostasis [GO:0055074]; cellular homeostasis [GO:0019725]; cellular response to organic cyclic compound [GO:0071407]; cementum mineralization [GO:0071529]; dephosphorylation [GO:0016311]; developmental process involved in reproduction [GO:0003006]; endochondral ossification [GO:0001958]; futile creatine cycle [GO:0140…	anchored component of membrane [GO:0031225]; extracellular matrix [GO:0031012]; extracellular membrane-bounded organelle [GO:0065010]; extracellular space [GO:0005615]; mitochondrial intermembrane space [GO:0005758]; mitochondrial membrane [GO:0031966]; plasma membrane [GO:0005886]
Q6MG61	Clic1	25.9178	25.5721	26.1471	25.099	25.7953	24.455	25.8567	25.8565	25.1256	26.603		Clic1	-0.126918	0.762874	1.09196	chloride transport [GO:0006821]; glutathione metabolic process [GO:0006749]; positive regulation of osteoblast differentiation [GO:0045669]; regulation of cell cycle [GO:0051726]; regulation of ion transmembrane transport [GO:0034765]; regulation of mitochondrial membrane potential [GO:0051881]	chloride channel complex [GO:0034707]; cytoplasm [GO:0005737]; extracellular exosome [GO:0070062]; membrane [GO:0016020]; mitochondrion [GO:0005739]; nuclear envelope [GO:0005635]; nuclear membrane [GO:0031965]; nucleus [GO:0005634]; perinuclear region of cytoplasm [GO:0048471]; plasma membrane [GO:0005886]
Q62867	Ggh	28.763	28.6829	29.156	29.2695	28.9429	28.4428	29.101	28.8922	29.0002	29.1191		Ggh	-0.0518028	0.76418	1.03656	poly-gamma-glutamate metabolic process [GO:0070500]; response to ethanol [GO:0045471]; response to insulin [GO:0032868]; response to xenobiotic stimulus [GO:0009410]; response to zinc ion [GO:0010043]; tetrahydrofolylpolyglutamate metabolic process [GO:0046900]	cytosol [GO:0005829]; extracellular space [GO:0005615]; lysosome [GO:0005764]; melanosome [GO:0042470]; vacuole [GO:0005773]
P29598	Plau	29.1257	29.1997	29.1704	26.6991	28.6937	28.6591	29.2485	28.5172	29.0808	28.0845		Plau	0.14032	0.794682	1.10215	angiogenesis [GO:0001525]; cellular response to fluid shear stress [GO:0071498]; cellular response to glucose stimulus [GO:0071333]; cellular response to hepatocyte growth factor stimulus [GO:0035729]; cellular response to hypoxia [GO:0071456]; cellular response to lipopolysaccharide [GO:0071222]; cellular response to organic substance [GO:0071310]; cellular response to staurosporine [GO:0072734]…	cell surface [GO:0009986]; extracellular space [GO:0005615]; membrane [GO:0016020]; protein complex involved in cell-matrix adhesion [GO:0098637]; serine protease inhibitor complex [GO:0097180]; serine-type endopeptidase complex [GO:1905370]
O35217	Minpp1	26.1285	26.6488	25.7422	25.5838	25.9328	25.8539	25.7518	25.5036	25.8715	26.6897		Minpp1	-0.0731258	0.794959	1.05199	phosphatidylinositol-mediated signaling [GO:0048015]	endoplasmic reticulum lumen [GO:0005788]
P63259	Actg1;Actb	30.0913	30.1519	30.6041	31.1208	30.4825	30.0845	30.1171	30.866	30.3556	30.7092		Actg1;Actb	-0.0636428	0.799519	1.0451	angiogenesis [GO:0001525]; cellular response to interferon-gamma [GO:0071346]; morphogenesis of a polarized epithelium [GO:0001738]; positive regulation of cell migration [GO:0030335]; positive regulation of gene expression [GO:0010628]; positive regulation of wound healing [GO:0090303]; protein localization to bicellular tight junction [GO:1902396]; regulation of focal adhesion assembly [GO:0051…	actin cytoskeleton [GO:0015629]; actin filament [GO:0005884]; apical junction complex [GO:0043296]; apical part of cell [GO:0045177]; basal body patch [GO:0120220]; calyx of Held [GO:0044305]; cell-cell junction [GO:0005911]; cytoskeleton [GO:0005856]; cytosol [GO:0005829]; dense body [GO:0097433]; extracellular exosome [GO:0070062]; filamentous actin [GO:0031941]; focal adhesion [GO:0005925]; my…
P01835	P01835	36.3901	35.6138	36.3652	34.65	36.1061	35.6194	36.0501	35.7889	35.7748	35.5538		P01835	-0.0676234	0.845686	1.04799	cellular oxidant detoxification [GO:0098869]; cellular response to reactive oxygen species [GO:0034614]; cytochrome c metabolic process [GO:1903606]; hemoglobin metabolic process [GO:0020027]; protein catabolic process [GO:0030163]; protein-chromophore linkage [GO:0018298]	cell surface [GO:0009986]; extracellular space [GO:0005615]; extrinsic component of mitochondrial inner membrane [GO:0031314]; intracellular membrane-bounded organelle [GO:0043231]; plasma membrane [GO:0005886]
Q64240	Ambp	30.2992	29.9097	30.5581	28.8524	30.0397	30.0646	29.9702	29.7798	30.4981	29.6411		Ambp	0.0589439	0.861305	1.0417	carbohydrate metabolic process [GO:0005975]; glucuronoside catabolic process [GO:0019391]	extracellular space [GO:0005615]; lysosome [GO:0005764]
P06760	Gusb	30.1234	27.1607	31.5741	27.3288	27.9243	25.8745	31.1639	29.6558	28.9744	29.3797		Gusb	0.187409	0.882345	1.13872	angiogenesis [GO:0001525]; cell differentiation [GO:0030154]; negative regulation of renal sodium excretion [GO:0035814]; peptide catabolic process [GO:0043171]; proteolysis [GO:0006508]; regulation of blood pressure [GO:0008217]; signal transduction [GO:0007165]	brush border membrane [GO:0031526]; cytoplasm [GO:0005737]; endoplasmic reticulum-Golgi intermediate compartment [GO:0005793]; external side of plasma membrane [GO:0009897]; extracellular exosome [GO:0070062]; extracellular space [GO:0005615]; integral component of membrane [GO:0016021]; plasma membrane [GO:0005886]
P15684	Anpep	29.1892	28.7373	28.5873	29.4881	29.4213	28.7741	29.2651	28.6112	29.2071	29.6933		Anpep	0.0255115	0.925296	1.01784	aldehyde catabolic process [GO:0046185]; cellular detoxification of aldehyde [GO:0110095]; daunorubicin metabolic process [GO:0044597]; D-glucuronate catabolic process [GO:0042840]; doxorubicin metabolic process [GO:0044598]; L-ascorbic acid biosynthetic process [GO:0019853]; lipid metabolic process [GO:0006629]	apical plasma membrane [GO:0016324]; cytosol [GO:0005829]; synapse [GO:0045202]
P51635	Akr1a1	26.7498	26.3539	27.1419	25.3709	26.3135	25.2181	26.6013	26.104	26.7146	27.0865		Akr1a1	-0.0411097	0.927376	1.0289	antimicrobial humoral immune response mediated by antimicrobial peptide [GO:0061844]; cytolysis by host of symbiont cells [GO:0051838]; defense response to fungus [GO:0050832]; fibrinolysis [GO:0042730]; heme export [GO:0097037]; heme transport [GO:0015886]; negative regulation of angiogenesis [GO:0016525]; negative regulation of blood vessel endothelial cell migration [GO:0043537]; negative regu…	cell surface [GO:0009986]; endolysosome [GO:0036019]; extracellular region [GO:0005576]; phagolysosome membrane [GO:0061474]; vesicle [GO:0031982]
Q99PS8	Hrg	24.4201	26.4859	25.4327	25.5748	25.1823	27.1794	24.7994	26.4584	25.52	23.3979		Hrg	0.0518821	0.945601	1.03662	acute-phase response [GO:0006953]; animal organ regeneration [GO:0031100]; cellular response to insulin stimulus [GO:0032869]; cerebral cortex development [GO:0021987]; male gonad development [GO:0008584]; negative regulation of bone mineralization [GO:0030502]; negative regulation of cell growth [GO:0030308]; negative regulation of endopeptidase activity [GO:0010951]; negative regulation of insu…	collagen-containing extracellular matrix [GO:0062023]; extracellular matrix [GO:0031012]; extracellular region [GO:0005576]; extracellular space [GO:0005615]; protein-containing complex [GO:0032991]
P24090	Ahsg	28.2239	28.9738	28.4584	28.8387	28.4321	29.994	28.4731	29.1278	28.0761	27.0941		Ahsg	-0.0324021	0.950675	1.02271	acute-phase response [GO:0006953]; angiogenesis [GO:0001525]; biological process involved in interaction with symbiont [GO:0051702]; blood coagulation, fibrin clot formation [GO:0072378]; calcium-independent cell-matrix adhesion [GO:0007161]; cell activation [GO:0001775]; cell adhesion [GO:0007155]; cell-matrix adhesion [GO:0007160]; cell-substrate junction assembly [GO:0007044]; cellular respons…	apical plasma membrane [GO:0016324]; basement membrane [GO:0005604]; collagen-containing extracellular matrix [GO:0062023]; endoplasmic reticulum-Golgi intermediate compartment [GO:0005793]; extracellular exosome [GO:0070062]; extracellular matrix [GO:0031012]; extracellular space [GO:0005615]; fibrinogen complex [GO:0005577]
P04937-4	Fn1	27.3509	28.4272	27.4155	26.6384	27.2737	28.9023	27.5648	27.794	25.9102	26.7784		Fn1	-0.0311844	0.958342	1.02185	purine nucleobase metabolic process [GO:0006144]; retinol metabolic process [GO:0042572]; thyroid hormone metabolic process [GO:0042403]; thyroid hormone transport [GO:0070327]	extracellular space [GO:0005615]; protein-containing complex [GO:0032991]
P02767	Ttr	28.1452	27.878	27.669	28.6884	28.2942	29.489	27.7617	27.6308	28.0203	27.8576		Ttr	0.016911	0.965845	1.01179

## Sheet: PCa2 vs. PCa1
	Gene names	PCa1	LFQ intensity G2C2	LFQ intensity G3C2	LFQ intensity G4C2	LFQ intensity G5C2	PCa2	LFQ intensity G2C4	LFQ intensity G3C4	LFQ intensity G4C4	LFQ intensity G5C4								Proteins detected in previous studies
Protein IDs	Gene names	LFQ intensity G1C2	LFQ intensity G2C2	LFQ intensity G3C2	LFQ intensity G4C2	LFQ intensity G5C2	LFQ intensity G1C4	LFQ intensity G2C4	LFQ intensity G3C4	LFQ intensity G4C4	LFQ intensity G5C4	Legend	Gene name	log2(PCa2 vs. PCa1)	p-value	Fold change	Gene ontology (biological process)	Gene ontology (cellular component)	Swensen et al., 2021 doi: 10.3389/fmed.2021.548212	Davalieva et al., 2017 doi:10.3390/proteomes6010001	Lima et al., 2022 doi: 10.3390/cancers14082001
P04916	Rbp4	26.208	26.3184	26.3517	26.4831	26.3162	25.417	25.1801	25.5746	24.4725	24.8645	Purple: proteins significantly downregulated in PCa1 vs. Cont1 (p<0.05)	Rbp4	-1.23374	0.000291959	2.35176	cardiac muscle tissue development [GO:0048738]; detection of light stimulus involved in visual perception [GO:0050908]; embryonic organ morphogenesis [GO:0048562]; embryonic retina morphogenesis in camera-type eye [GO:0060059]; embryonic skeletal system development [GO:0048706]; eye development [GO:0001654]; female genitalia morphogenesis [GO:0048807]; gluconeogenesis [GO:0006094]; glucose homeos…	extracellular space [GO:0005615]; protein-containing complex [GO:0032991]			+
P02761	P02761	36.7677	36.6807	36.6699	36.8574	37.2044	35.6194	36.0501	35.7889	35.7748	35.5538	Green: proteins significantly upregulated in PCa1 vs. Cont1 (p<0.05)	P02761	-1.07861	3.43018e-05	2.112	aerobic respiration [GO:0009060]; cellular response to lipid [GO:0071396]; energy reserve metabolic process [GO:0006112]; glucose homeostasis [GO:0042593]; heat generation [GO:0031649]; locomotor rhythm [GO:0045475]; mitochondrion morphogenesis [GO:0070584]; negative regulation of gluconeogenesis [GO:0045721]; negative regulation of insulin secretion involved in cellular response to glucose stimu…	cytosol [GO:0005829]; extracellular space [GO:0005615]; nucleus [GO:0005634]
P81828	P81828	33.0056	33.0741	32.8094	33.1098	32.8807	32.4248	32.6987	31.0615	32.156	31.4345	Blue: proteins whose abundance is not statistically signficant between PCa1 and Cont1 (p>0.05)	P81828	-1.02083	0.0113502	2.02908		extracellular region [GO:0005576]
Q9EPB1	Dpp7	29.2231	29.3915	29.1973	29.1439	29.5964	28.4	28.4718	28.5918	28.0395	28.5169		Dpp7	-0.906434	9.7665e-05	1.87441	lysosomal protein catabolic process [GO:1905146]; protein catabolic process [GO:0030163]; proteolysis [GO:0006508]	cytoplasmic vesicle [GO:0031410]; cytosol [GO:0005829]; extracellular region [GO:0005576]; lysosome [GO:0005764]; vesicle [GO:0031982]	+
Q63691	Cd14	26.564	26.6023	26.1418	24.8496	26.3915	25.3605	25.4294	25.0252	25.1754	25.5367		Cd14	-0.804376	0.0445524	1.74639	cellular response to diacyl bacterial lipopeptide [GO:0071726]; cellular response to lipopolysaccharide [GO:0071222]; cellular response to lipoteichoic acid [GO:0071223]; cellular response to molecule of bacterial origin [GO:0071219]; cellular response to triacyl bacterial lipopeptide [GO:0071727]; inflammatory response [GO:0006954]; innate immune response [GO:0045087]; lipopolysaccharide-mediate…	anchored component of external side of plasma membrane [GO:0031362]; cell surface [GO:0009986]; external side of plasma membrane [GO:0009897]; extracellular space [GO:0005615]; Golgi apparatus [GO:0005794]; lipopolysaccharide receptor complex [GO:0046696]; membrane raft [GO:0045121]; plasma membrane [GO:0005886]
P52759	Hrsp12	26.9274	27.2239	26.651	26.9308	27.2893	26.0108	26.5029	26.3084	26.6389	25.5709		Hrsp12	-0.798092	0.00717205	1.7388	brain development [GO:0007420]; G1 to G0 transition [GO:0070314]; kidney development [GO:0001822]; lipid metabolic process [GO:0006629]; lung development [GO:0030324]; mRNA catabolic process [GO:0006402]; mRNA destabilization [GO:0061157]; negative regulation of epithelial cell proliferation [GO:0050680]; negative regulation of translation [GO:0017148]; organonitrogen compound catabolic process […	cytoplasm [GO:0005737]; cytosol [GO:0005829]; mitochondrial matrix [GO:0005759]; mitochondrion [GO:0005739]; nucleus [GO:0005634]; peroxisome [GO:0005777]	+
P15083	Pigr	28.9356	28.3611	29.4781	28.2091	28.2315	27.4683	28.0263	27.7157	28.0846	28.162		Pigr	-0.75171	0.0273841	1.68379	detection of chemical stimulus involved in sensory perception of bitter taste [GO:0001580]; epidermal growth factor receptor signaling pathway [GO:0007173]; Fc receptor signaling pathway [GO:0038093]; immunoglobulin transcytosis in epithelial cells mediated by polymeric immunoglobulin receptor [GO:0002415]; receptor clustering [GO:0043113]	extracellular space [GO:0005615]; integral component of membrane [GO:0016021]; plasma membrane [GO:0005886]; receptor complex [GO:0043235]; recycling endosome membrane [GO:0055038]; secretory IgA immunoglobulin complex [GO:0071751]; transport vesicle [GO:0030133]	+	+	+
P28826	Mep1b	28.7388	28.3817	28.0101	28.7435	28.5519	27.2303	28.2813	27.5482	27.7922	27.8274		Mep1b	-0.74933	0.0093663	1.68101	inflammatory response [GO:0006954]; proteolysis [GO:0006508]; toxin transport [GO:1901998]	extracellular region [GO:0005576]; integral component of plasma membrane [GO:0005887]; membrane [GO:0016020]; meprin A complex [GO:0017090]	+
Q6IRK9	Cpq	29.9698	29.7676	30.3497	30.1226	30.1151	29.0173	29.3938	28.5639	30.0351	29.8534		Cpq	-0.692277	0.041779	1.61583	peptide catabolic process [GO:0043171]; proteolysis [GO:0006508]; thyroid hormone generation [GO:0006590]; tissue regeneration [GO:0042246]	cytoplasm [GO:0005737]; endoplasmic reticulum [GO:0005783]; extracellular space [GO:0005615]; Golgi apparatus [GO:0005794]; lysosome [GO:0005764]	+
P50123	Enpep	28.394	28.6047	27.6841	28.7484	28.4867	27.3413	27.7663	27.3272	28.2442	28.0802		Enpep	-0.631719	0.0429239	1.54941	angiogenesis [GO:0001525]; cell migration [GO:0016477]; cell population proliferation [GO:0008283]; glomerulus development [GO:0032835]; peptide catabolic process [GO:0043171]; proteolysis [GO:0006508]; regulation of blood pressure [GO:0008217]; regulation of systemic arterial blood pressure by renin-angiotensin [GO:0003081]; signal transduction [GO:0007165]	apical part of cell [GO:0045177]; apical plasma membrane [GO:0016324]; brush border [GO:0005903]; brush border membrane [GO:0031526]; cytoplasm [GO:0005737]; cytoplasmic vesicle [GO:0031410]; external side of plasma membrane [GO:0009897]; integral component of membrane [GO:0016021]; plasma membrane [GO:0005886]	+
Q68FP1-2	Gsn	29.635	29.897	29.6304	29.5787	29.7281	29.1589	28.97	28.5737	29.5779	29.0722		Gsn	-0.623308	0.00655879	1.5404	actin cytoskeleton organization [GO:0030036]; actin filament capping [GO:0051693]; actin filament depolymerization [GO:0030042]; actin filament polymerization [GO:0030041]; actin filament reorganization [GO:0090527]; actin filament severing [GO:0051014]; actin nucleation [GO:0045010]; actin polymerization or depolymerization [GO:0008154]; aging [GO:0007568]; amyloid fibril formation [GO:1990000];…	actin cap [GO:0030478]; actin cytoskeleton [GO:0015629]; cortical actin cytoskeleton [GO:0030864]; cytoplasm [GO:0005737]; cytosol [GO:0005829]; extracellular region [GO:0005576]; extracellular space [GO:0005615]; lamellipodium [GO:0030027]; myelin sheath [GO:0043209]; perinuclear region of cytoplasm [GO:0048471]; phagocytic vesicle [GO:0045335]; plasma membrane [GO:0005886]; podosome [GO:0002102…	+	+
P10960	Psap	26.8977	26.607	26.207	26.4872	26.6024	26.2815	26.0657	25.6908	26.1379	25.5346		Psap	-0.618144	0.0088299	1.5349	adenylate cyclase-inhibiting G protein-coupled receptor signaling pathway [GO:0007193]; antigen processing and presentation [GO:0019882]; cellular response to organic substance [GO:0071310]; ceramide metabolic process [GO:0006672]; cerebellar Purkinje cell differentiation [GO:0021702]; cochlea development [GO:0090102]; corneocyte development [GO:0003335]; cornified envelope assembly [GO:1903575];…	aggresome [GO:0016235]; cytoplasm [GO:0005737]; extracellular region [GO:0005576]; extracellular space [GO:0005615]; late endosome [GO:0005770]; lysosome [GO:0005764]
Q5U2Q3	Q5U2Q3	25.399	25.9725	25.5177	26.3656	26.4382	25.0436	25.5931	25.1024	25.7231	25.1845		Q5U2Q3	-0.609257	0.0426248	1.52547		nuclear body [GO:0016604]; nucleus [GO:0005634]
P82450	Siae	25.1508	25.6041	25.3414	24.9759	24.5425	24.6336	24.6018	24.5025	24.4435	24.4603		Siae	-0.594629	0.0116181	1.51008	carbohydrate metabolic process [GO:0005975]; regulation of immune system process [GO:0002682]	lysosome [GO:0005764]	+	+	+
Q64240	Ambp	30.7191	30.4185	30.6526	30.4778	30.5726	30.0646	29.9702	29.7798	30.4981	29.6411		Ambp	-0.57737	0.00615958	1.49213	cellular oxidant detoxification [GO:0098869]; cellular response to reactive oxygen species [GO:0034614]; cytochrome c metabolic process [GO:1903606]; hemoglobin metabolic process [GO:0020027]; protein catabolic process [GO:0030163]; protein-chromophore linkage [GO:0018298]	cell surface [GO:0009986]; extracellular space [GO:0005615]; extrinsic component of mitochondrial inner membrane [GO:0031314]; intracellular membrane-bounded organelle [GO:0043231]; plasma membrane [GO:0005886]	+	+	+
Q00657	Cspg4	28.0524	28.0691	28.1219	28.3985	27.8379	27.7551	27.5752	27.0954	27.3512	27.9552		Cspg4	-0.549555	0.0139022	1.46363	angiogenesis [GO:0001525]; cell population proliferation [GO:0008283]; glial cell migration [GO:0008347]; inflammatory response [GO:0006954]; intracellular signal transduction [GO:0035556]; negative regulation of neuron projection development [GO:0010977]; neuron remodeling [GO:0016322]; platelet-derived growth factor receptor signaling pathway [GO:0048008]; positive regulation of MAPK cascade [G…	apical plasma membrane [GO:0016324]; cell projection [GO:0042995]; cell surface [GO:0009986]; integral component of plasma membrane [GO:0005887]; lamellipodium membrane [GO:0031258]; plasma membrane [GO:0005886]; ruffle [GO:0001726]		+
P08937	Obp1f	25.4919	25.7285	25.8219	25.5225	24.9514	24.5165	24.6536	25.1478	25.2353	25.2595		Obp1f	-0.540695	0.0379535	1.45467	response to stimulus [GO:0050896]; sensory perception of smell [GO:0007608]	extracellular space [GO:0005615]
P02625	Pvalb	26.8569	26.0413	26.1628	26.1425	26.1604	25.575	26.1085	25.7953	25.6052	25.6553		Pvalb	-0.5249	0.0180545	1.43883	cochlea development [GO:0090102]; excitatory chemical synaptic transmission [GO:0098976]; gene expression [GO:0010467]; inhibitory chemical synaptic transmission [GO:0098977]	axon [GO:0030424]; cuticular plate [GO:0032437]; cytoplasm [GO:0005737]; neuronal cell body [GO:0043025]; nucleus [GO:0005634]; protein-containing complex [GO:0032991]; stereocilium [GO:0032420]; terminal bouton [GO:0043195]
P07522	Egf	33.2693	33.5189	33.393	33.5266	33.2199	32.7212	33.1379	32.5658	32.8583	33.0763		Egf	-0.513644	0.00325081	1.42765	angiogenesis [GO:0001525]; branching morphogenesis of an epithelial tube [GO:0048754]; epidermal growth factor receptor signaling pathway [GO:0007173]; epidermal growth factor receptor signaling pathway via MAPK cascade [GO:0038029]; ERK1 and ERK2 cascade [GO:0070371]; intracellular signal transduction [GO:0035556]; kidney development [GO:0001822]; mammary gland alveolus development [GO:0060749];…	extracellular exosome [GO:0070062]; extracellular space [GO:0005615]; integral component of membrane [GO:0016021]; plasma membrane [GO:0005886]	+	+	+
P14841	Cst3	29.495	29.4786	29.2055	29.9096	29.42	29.0259	28.9604	28.7287	29.2279	29.3413		Cst3	-0.444885	0.021684	1.36121	apoptotic process [GO:0006915]; brain development [GO:0007420]; cell activation [GO:0001775]; cellular response to hydrogen peroxide [GO:0070301]; cellular response to oxidative stress [GO:0034599]; circadian sleep/wake cycle, REM sleep [GO:0042747]; defense response [GO:0006952]; embryo implantation [GO:0007566]; eye development [GO:0001654]; male gonad development [GO:0008584]; negative regulat…	axon [GO:0030424]; basement membrane [GO:0005604]; cell projection [GO:0042995]; contractile fiber [GO:0043292]; cytoplasm [GO:0005737]; endoplasmic reticulum [GO:0005783]; extracellular region [GO:0005576]; extracellular space [GO:0005615]; Golgi apparatus [GO:0005794]; lysosome [GO:0005764]; multivesicular body [GO:0005771]; neuronal cell body [GO:0043025]; nuclear membrane [GO:0031965]; perinu…	+
P23680	Apcs	27.2086	27.2669	27.0162	27.2233	27.4235	26.8971	26.9193	27.0649	26.9148	26.2358		Apcs	-0.421307	0.0298001	1.33914	complement activation, classical pathway [GO:0006958]; innate immune response [GO:0045087]; negative regulation by host of viral exo-alpha-sialidase activity [GO:0044869]; negative regulation by host of viral glycoprotein metabolic process [GO:0044871]; negative regulation by host of viral process [GO:0044793]; negative regulation of exo-alpha-sialidase activity [GO:1903016]; negative regulation …	extracellular space [GO:0005615]; protein-containing complex [GO:0032991]	+
P08932	P08932	29.7682	29.2231	29.3448	29.5067	29.4427	29.8434	29.7056	29.8991	29.9058	29.7581		P08932	0.365281	0.006288	1.28813	acute-phase response [GO:0006953]; negative regulation of blood coagulation [GO:0030195]; negative regulation of endopeptidase activity [GO:0010951]; positive regulation of cytosolic calcium ion concentration [GO:0007204]; vasodilation [GO:0042311]	extracellular region [GO:0005576]; extracellular space [GO:0005615]
P17475	Serpina1	31.0052	31.2834	31.0003	31.4673	31.2137	31.7566	31.5607	32.0144	31.8773	32.253		Serpina1	0.698435	0.00141933	1.62274	acute-phase response [GO:0006953]; inflammatory response [GO:0006954]; negative regulation of endopeptidase activity [GO:0010951]; negative regulation of serine-type endopeptidase activity [GO:1900004]; response to chromate [GO:0046687]; response to cytokine [GO:0034097]; response to estradiol [GO:0032355]; response to hypoxia [GO:0001666]; response to inorganic substance [GO:0010035]; response t…	endoplasmic reticulum [GO:0005783]; extracellular space [GO:0005615]; Golgi apparatus [GO:0005794]	+	+
P04764	Eno1	26.1932	26.6647	26.2586	27.1557	26.923	27.691	27.0144	28.0195	26.7459	27.2278		Eno1	0.700685	0.0452489	1.62528	canonical glycolysis [GO:0061621]; cellular response to hypoxia [GO:0071456]; cellular response to interleukin-7 [GO:0098761]; ERK1 and ERK2 cascade [GO:0070371]; glycolytic process [GO:0006096]; in utero embryonic development [GO:0001701]; negative regulation of cell growth [GO:0030308]; negative regulation of hypoxia-induced intrinsic apoptotic signaling pathway [GO:1903298]; negative regulatio…	cell cortex [GO:0005938]; cell surface [GO:0009986]; cytoplasm [GO:0005737]; cytosol [GO:0005829]; extrinsic component of plasma membrane [GO:0019897]; growth cone [GO:0030426]; membrane [GO:0016020]; membrane raft [GO:0045121]; neuron projection [GO:0043005]; nuclear outer membrane [GO:0005640]; phosphopyruvate hydratase complex [GO:0000015]; plasma membrane [GO:0005886]; synaptic membrane [GO:0…	+
Q9QX79	Fetub	26.8179	26.8596	26.5682	27.0057	26.4377	28.3463	27.1403	27.6223	27.4278	27.4232		Fetub	0.854169	0.00567617	1.80772	binding of sperm to zona pellucida [GO:0007339]; negative regulation of endopeptidase activity [GO:0010951]; single fertilization [GO:0007338]	extracellular region [GO:0005576]; extracellular space [GO:0005615]
P62804	Hist1h4b	26.9886	26.9045	27.056	27.3472	26.5891	28.1302	27.2306	29.1777	27.2278	27.7578		Hist1h4b	0.927758	0.0409192	1.90232	cell differentiation [GO:0030154]; DNA replication-dependent chromatin assembly [GO:0006335]; DNA replication-independent chromatin assembly [GO:0006336]; DNA-templated transcription, initiation [GO:0006352]; negative regulation of megakaryocyte differentiation [GO:0045653]; nucleosome assembly [GO:0006334]; ossification [GO:0001503]	CENP-A containing nucleosome [GO:0043505]; extracellular region [GO:0005576]; nuclear chromosome [GO:0000228]; nucleoplasm [GO:0005654]; nucleosome [GO:0000786]; nucleus [GO:0005634]; protein-containing complex [GO:0032991]	+
P12346	Tf	33.1586	32.938	32.4335	33.5485	32.2572	34.6021	33.1392	34.1414	33.6168	33.4986		Tf	0.932446	0.0282684	1.90851	actin filament organization [GO:0007015]; acute-phase response [GO:0006953]; antibacterial humoral response [GO:0019731]; apoptotic process [GO:0006915]; cellular iron ion homeostasis [GO:0006879]; cellular response to cAMP [GO:0071320]; cellular response to follicle-stimulating hormone stimulus [GO:0071372]; cellular response to iron ion [GO:0071281]; ERK1 and ERK2 cascade [GO:0070371]; iron ion…	apical plasma membrane [GO:0016324]; basal part of cell [GO:0045178]; basal plasma membrane [GO:0009925]; basement membrane [GO:0005604]; cell surface [GO:0009986]; cell tip [GO:0051286]; clathrin-coated pit [GO:0005905]; cytoplasmic vesicle [GO:0031410]; early endosome [GO:0005769]; endocytic vesicle [GO:0030139]; endosome [GO:0005768]; extracellular region [GO:0005576]; extracellular space [GO:…	+	+	+
P13635	Cp	28.7508	28.4082	28.0879	29.2861	28.4977	30.2812	28.8866	29.8186	29.4421	29.5458		Cp	0.988724	0.0117043	1.98443	aging [GO:0007568]; cellular iron ion homeostasis [GO:0006879]; female pregnancy [GO:0007565]; iron ion homeostasis [GO:0055072]; iron ion transport [GO:0006826]; lactation [GO:0007595]; liver development [GO:0001889]; lung development [GO:0030324]; mammary gland involution [GO:0060056]; plasma membrane copper ion transport [GO:0015679]; response to copper ion [GO:0046688]; response to nutrient […	anchored component of plasma membrane [GO:0046658]; extracellular space [GO:0005615]; plasma membrane [GO:0005886]	+	+	+
P20760	Igg-2a	30.7049	30.4781	30.5696	30.3011	30.6424	32.4903	31.007	31.6349	31.3722	31.5068		Igg-2a	1.06304	0.00316267	2.08932	B cell receptor signaling pathway [GO:0050853]; complement activation, classical pathway [GO:0006958]; defense response to bacterium [GO:0042742]; innate immune response [GO:0045087]; phagocytosis, engulfment [GO:0006911]; phagocytosis, recognition [GO:0006910]; positive regulation of B cell activation [GO:0050871]	external side of plasma membrane [GO:0009897]; immunoglobulin complex, circulating [GO:0042571]	+	+	+
Q03626	Mug1	27.9329	27.6362	27.2077	28.0605	27.1848	29.851	28.3374	28.7881	28.4855	28.1495		Mug1	1.11789	0.0128623	2.1703	acute-phase response [GO:0006953]; embryo implantation [GO:0007566]; inflammatory response [GO:0006954]	extracellular space [GO:0005615]
P30152	Lcn2	26.3272	26.5044	26.8202	26.2828	27.1249	27.778	26.6033	29.0534	27.3474	27.9716		Lcn2	1.13882	0.029903	2.202	acute-phase response [GO:0006953]; cellular response to amyloid-beta [GO:1904646]; cellular response to hydrogen peroxide [GO:0070301]; cellular response to increased oxygen levels [GO:0036295]; cellular response to interleukin-1 [GO:0071347]; cellular response to interleukin-6 [GO:0071354]; cellular response to lipopolysaccharide [GO:0071222]; cellular response to nerve growth factor stimulus [G…	cytoplasm [GO:0005737]; cytoplasmic vesicle lumen [GO:0060205]; cytosol [GO:0005829]; extracellular region [GO:0005576]; extracellular space [GO:0005615]	+		+
P20761	Igh-1a	25.8082	25.0435	26.0179	26.6771	26.0334	28.7427	26.4832	28.5036	27.0113	26.2277		Igh-1a	1.47765	0.0346507	2.78494	B cell receptor signaling pathway [GO:0050853]; complement activation, classical pathway [GO:0006958]; defense response to bacterium [GO:0042742]; innate immune response [GO:0045087]; phagocytosis, engulfment [GO:0006911]; phagocytosis, recognition [GO:0006910]; positive regulation of B cell activation [GO:0050871]	external side of plasma membrane [GO:0009897]; immunoglobulin complex, circulating [GO:0042571]	+	+	+
P02680-2	Fgg	21.2058	22.6561	21.7427	26.8213	23.6075	29.2902	26.6033	28.1727	23.8958	24.6324		Fgg	3.31219	0.0484264	9.93274	blood coagulation, fibrin clot formation [GO:0072378]; cell-matrix adhesion [GO:0007160]; cellular response to interleukin-1 [GO:0071347]; cellular response to interleukin-6 [GO:0071354]; fibrinolysis [GO:0042730]; negative regulation of endothelial cell apoptotic process [GO:2000352]; negative regulation of extrinsic apoptotic signaling pathway via death domain receptors [GO:1902042]; negative r…	blood microparticle [GO:0072562]; cell cortex [GO:0005938]; cell surface [GO:0009986]; collagen-containing extracellular matrix [GO:0062023]; cytoplasm [GO:0005737]; external side of plasma membrane [GO:0009897]; extracellular space [GO:0005615]; fibrinogen complex [GO:0005577]; platelet alpha granule [GO:0031091]; synapse [GO:0045202]
P14046	A1i3	31.5415	30.3952	29.7808	31.2284	29.7452	32.8665	31.2627	31.8675	30.9106	31.3645		A1i3	1.11613	0.0563213	2.16765		extracellular space [GO:0005615]
P02770	Alb	35.7568	35.4877	35.6401	36.1417	35.0705	36.6186	35.8048	36.5094	36.048	35.8168		Alb	0.540176	0.0584785	1.45415	cellular response to starvation [GO:0009267]; maintenance of mitochondrion location [GO:0051659]; negative regulation of apoptotic process [GO:0043066]; positive regulation of circadian sleep/wake cycle, non-REM sleep [GO:0046010]; response to mercury ion [GO:0046689]; response to nutrient [GO:0007584]; response to organic substance [GO:0010033]; response to platinum ion [GO:0070541]; vasodilatio…	basement membrane [GO:0005604]; cytoplasm [GO:0005737]; extracellular exosome [GO:0070062]; extracellular region [GO:0005576]; extracellular space [GO:0005615]; protein-containing complex [GO:0032991]
P98158	Lrp2	30.5111	29.9704	30.017	30.1086	30.1298	29.9256	29.7622	29.4799	29.7494	30.1897		Lrp2	-0.326013	0.0624693	1.25354	aging [GO:0007568]; amyloid-beta clearance [GO:0097242]; animal organ regeneration [GO:0031100]; aorta development [GO:0035904]; cell population proliferation [GO:0008283]; cellular response to growth factor stimulus [GO:0071363]; chemoattraction of axon [GO:0061642]; coronary artery morphogenesis [GO:0060982]; coronary vasculature development [GO:0060976]; endocytic hemoglobin import into cell […	apical part of cell [GO:0045177]; apical plasma membrane [GO:0016324]; axon [GO:0030424]; axonal growth cone [GO:0044295]; brush border [GO:0005903]; brush border membrane [GO:0031526]; cell surface [GO:0009986]; clathrin-coated pit [GO:0005905]; cytoplasm [GO:0005737]; dendrite [GO:0030425]; endocytic vesicle [GO:0030139]; endoplasmic reticulum [GO:0005783]; endosome [GO:0005768]; endosome lumen…
Q4QQW8	Plbd2	24.3933	25.2644	25.4467	25.3412	24.9523	23.9063	24.5966	23.8913	25.3118	24.3116		Plbd2	-0.676076	0.0706703	1.59779	phospholipid catabolic process [GO:0009395]	extracellular region [GO:0005576]; lysosomal lumen [GO:0043202]; lysosome [GO:0005764]
Q6AYS7	Acy1a	25.237	25.5049	25.6199	24.9395	26.2142	24.3917	24.7611	25.5215	24.9593	24.9596		Acy1a	-0.584473	0.0709564	1.49949	cellular amino acid metabolic process [GO:0006520]; protein catabolic process [GO:0030163]	cytoplasm [GO:0005737]; extracellular exosome [GO:0070062]
P15399-2	Pbsn	30.0655	30.7107	33.5744	28.98	34.0332	23.8431	30.7895	25.3654	29.1306	30.4086		Pbsn	-3.56533	0.071164	11.8378		extracellular space [GO:0005615]; nucleus [GO:0005634]
P85971	Pgls	25.0092	24.969	24.9287	25.012	25.0925	25.4467	25.8175	25.1051	24.9094	25.3536		Pgls	0.324181	0.073063	1.25195	carbohydrate metabolic process [GO:0005975]; pentose-phosphate shunt [GO:0006098]; pentose-phosphate shunt, oxidative branch [GO:0009051]	cytoplasm [GO:0005737]
Q5XI43	Mxra8	28.8904	28.7662	28.6606	29.2032	28.7788	28.3483	28.6015	28.3704	28.972	28.5016		Mxra8	-0.301071	0.0739885	1.23206	cell adhesion [GO:0007155]; establishment of glial blood-brain barrier [GO:0060857]	bicellular tight junction [GO:0005923]; cell surface [GO:0009986]; ciliary membrane [GO:0060170]; cytoplasm [GO:0005737]; integral component of membrane [GO:0016021]; nucleus [GO:0005634]
P14630	Apom	25.8941	25.8023	25.9498	26.3824	26.1824	25.4668	25.577	25.3927	26.3024	25.5271		Apom	-0.389001	0.0825877	1.30949	cholesterol efflux [GO:0033344]; high-density lipoprotein particle assembly [GO:0034380]; high-density lipoprotein particle clearance [GO:0034384]; high-density lipoprotein particle remodeling [GO:0034375]; lipoprotein metabolic process [GO:0042157]; negative regulation of plasma lipoprotein oxidation [GO:0034445]; response to glucose [GO:0009749]; reverse cholesterol transport [GO:0043691]	discoidal high-density lipoprotein particle [GO:0034365]; extracellular region [GO:0005576]; extracellular space [GO:0005615]; high-density lipoprotein particle [GO:0034364]; low-density lipoprotein particle [GO:0034362]; spherical high-density lipoprotein particle [GO:0034366]; very-low-density lipoprotein particle [GO:0034361]
P01048	Map1	29.1038	28.3687	28.6159	28.3368	27.8638	29.2122	28.7606	28.9137	29.4001	28.5141		Map1	0.502339	0.0858443	1.41651	acute-phase response [GO:0006953]; negative regulation of blood coagulation [GO:0030195]; negative regulation of endopeptidase activity [GO:0010951]; positive regulation of cytosolic calcium ion concentration [GO:0007204]; vasodilation [GO:0042311]	extracellular region [GO:0005576]; extracellular space [GO:0005615]
P10252	Cd48	26.8544	27.0893	26.7502	26.9122	26.7086	26.3235	26.9164	26.6374	26.6725	26.6369		Cd48	-0.2256	0.0870768	1.16926	mast cell activation [GO:0045576]; regulation of adaptive immune response [GO:0002819]; signal transduction [GO:0007165]; T cell activation [GO:0042110]	anchored component of plasma membrane [GO:0046658]; external side of plasma membrane [GO:0009897]; membrane raft [GO:0045121]; plasma membrane [GO:0005886]; protein-containing complex [GO:0032991]
P19112	Fbp1	25.721	26.1293	25.4809	26.4903	26.6484	25.2464	25.8933	25.7879	25.4685	25.6515		Fbp1	-0.484465	0.0882821	1.39907	carbohydrate metabolic process [GO:0005975]; cellular response to insulin stimulus [GO:0032869]; cellular response to magnesium ion [GO:0071286]; cellular response to xenobiotic stimulus [GO:0071466]; dephosphorylation [GO:0016311]; fructose 1,6-bisphosphate metabolic process [GO:0030388]; fructose 6-phosphate metabolic process [GO:0006002]; fructose metabolic process [GO:0006000]; gluconeogenesi…	cytoplasm [GO:0005737]; cytosol [GO:0005829]; nucleus [GO:0005634]
Q6P7A9	Gaa	25.848	26.5536	25.1422	25.499	24.9506	24.9244	25.1175	25.0049	24.9757	25.1792		Gaa	-0.558338	0.0883393	1.47257	cardiac muscle contraction [GO:0060048]; diaphragm contraction [GO:0002086]; glycogen catabolic process [GO:0005980]; glycogen metabolic process [GO:0005977]; heart morphogenesis [GO:0003007]; locomotory behavior [GO:0007626]; lysosome organization [GO:0007040]; muscle cell cellular homeostasis [GO:0046716]; neuromuscular process controlling balance [GO:0050885]; neuromuscular process controlling…	lysosomal membrane [GO:0005765]; lysosome [GO:0005764]; membrane [GO:0016020]
Q63716	Prdx1	25.2554	25.4667	25.2438	25.3216	25.7417	24.2742	25.0098	25.4888	24.0669	25.3167		Prdx1	-0.574585	0.0892869	1.48925	cell population proliferation [GO:0008283]; cell redox homeostasis [GO:0045454]; erythrocyte homeostasis [GO:0034101]; hydrogen peroxide catabolic process [GO:0042744]; leukocyte activation [GO:0045321]; natural killer cell activation [GO:0030101]; natural killer cell mediated cytotoxicity [GO:0042267]; regulation of NIK/NF-kappaB signaling [GO:1901222]; regulation of stress-activated MAPK cascad…	cytoplasm [GO:0005737]; cytosol [GO:0005829]; euchromatin [GO:0000791]; mitochondrial matrix [GO:0005759]; nucleolus [GO:0005730]; nucleus [GO:0005634]; peroxisomal matrix [GO:0005782]
P31211	Serpina6	27.8847	26.7282	26.6331	27.191	25.7434	27.4244	27.3386	27.2465	27.8025	28.1053		Serpina6	0.747376	0.0893831	1.67874	glucocorticoid metabolic process [GO:0008211]; negative regulation of endopeptidase activity [GO:0010951]	extracellular space [GO:0005615]
O70417	Pip	27.6286	27.8013	27.4604	27.6057	27.8214	26.7482	27.3711	27.4394	27.0053	24.4806		Pip	-1.05457	0.0918495	2.0771	detection of chemical stimulus involved in sensory perception of bitter taste [GO:0001580]; negative regulation of T cell apoptotic process [GO:0070233]; positive regulation of gene expression [GO:0010628]; proteolysis [GO:0006508]; regulation of immune system process [GO:0002682]	apical plasma membrane [GO:0016324]; extracellular region [GO:0005576]; extracellular space [GO:0005615]; nucleus [GO:0005634]
P01015	Agt	27.3611	27.2247	27.6433	27.7622	26.6259	26.9009	26.0952	26.9233	27.3233	26.6771		Agt	-0.539483	0.0931079	1.45345	activation of NF-kappaB-inducing kinase activity [GO:0007250]; activation of phospholipase C activity [GO:0007202]; aging [GO:0007568]; aldosterone secretion [GO:0035932]; angiotensin-activated signaling pathway [GO:0038166]; angiotensin-mediated drinking behavior [GO:0003051]; angiotensin-mediated vasoconstriction involved in regulation of systemic arterial blood pressure [GO:0001998]; artery sm…	cytoplasm [GO:0005737]; extracellular space [GO:0005615]
P08723	Sbp	30.9679	30.9764	33.0742	27.4059	29.9541	22.3338	28.5328	29.1025	28.4064	29.073		Sbp	-2.98601	0.0971999	7.92279		extracellular space [GO:0005615]
Q9WTW7	Slc23a1	25.7326	25.6519	24.708	25.2731	25.4538	24.9184	25.3785	24.4706	24.7726	25.0859		Slc23a1	-0.438703	0.101729	1.35539	brain development [GO:0007420]; dehydroascorbic acid transport [GO:0070837]; L-ascorbic acid transmembrane transport [GO:0015882]; lung development [GO:0030324]; response to toxic substance [GO:0009636]; sodium ion transport [GO:0006814]; transepithelial L-ascorbic acid transport [GO:0070904]	apical plasma membrane [GO:0016324]; basal plasma membrane [GO:0009925]; brush border [GO:0005903]; cytoplasm [GO:0005737]; integral component of plasma membrane [GO:0005887]; intracellular organelle [GO:0043229]; plasma membrane [GO:0005886]
P31977	Ezr	28.7459	29.2357	28.0089	28.3946	28.8651	27.1426	28.0828	28.211	28.1332	28.7579		Ezr	-0.584539	0.118266	1.49956	actin cytoskeleton reorganization [GO:0031532]; actin filament bundle assembly [GO:0051017]; astral microtubule organization [GO:0030953]; cellular response to cAMP [GO:0071320]; cortical microtubule organization [GO:0043622]; epithelial cell differentiation [GO:0030855]; establishment of centrosome localization [GO:0051660]; establishment of endothelial barrier [GO:0061028]; establishment or mai…	actin cytoskeleton [GO:0015629]; actin filament [GO:0005884]; adherens junction [GO:0005912]; apical part of cell [GO:0045177]; apical plasma membrane [GO:0016324]; astrocyte projection [GO:0097449]; basolateral plasma membrane [GO:0016323]; brush border [GO:0005903]; cell body [GO:0044297]; cell cortex [GO:0005938]; cell periphery [GO:0071944]; cell projection [GO:0042995]; cell tip [GO:0051286]…
P14480	Fgb	22.0585	22.683	22.6325	26.1122	23.9332	29.5554	25.0282	27.344	23.4118	23.7383		Fgb	2.33167	0.127199	5.03387	adaptive immune response [GO:0002250]; blood coagulation, fibrin clot formation [GO:0072378]; cell adhesion [GO:0007155]; cell-matrix adhesion [GO:0007160]; cellular response to interleukin-1 [GO:0071347]; cellular response to leptin stimulus [GO:0044320]; fibrinolysis [GO:0042730]; induction of bacterial agglutination [GO:0043152]; innate immune response [GO:0045087]; negative regulation of endo…	blood microparticle [GO:0072562]; cell cortex [GO:0005938]; cell surface [GO:0009986]; collagen-containing extracellular matrix [GO:0062023]; cytoplasm [GO:0005737]; endoplasmic reticulum [GO:0005783]; external side of plasma membrane [GO:0009897]; extracellular space [GO:0005615]; fibrinogen complex [GO:0005577]; platelet alpha granule [GO:0031091]; synapse [GO:0045202]
P81827	P81827	34.0013	33.889	32.4409	33.566	32.6067	33.16	33.5849	28.5821	31.775	31.4552		P81827	-1.58936	0.128654	3.00916		extracellular region [GO:0005576]
P05545	Serpina3k	32.6835	32.2011	32.2399	32.5351	32.3434	31.6753	32.276	32.1017	32.2285	32.4096		Serpina3k	-0.262368	0.129966	1.19945	negative regulation of endopeptidase activity [GO:0010951]	extracellular space [GO:0005615]
P56574	Idh2	23.5982	23.7401	23.9978	23.7704	24.4055	23.5081	24.0805	24.8334	24.6863	24.8875		Idh2	0.496765	0.136674	1.41105	2-oxoglutarate metabolic process [GO:0006103]; glyoxylate cycle [GO:0006097]; isocitrate metabolic process [GO:0006102]; NADP biosynthetic process [GO:0006741]; NADP metabolic process [GO:0006739]; negative regulation of glial cell migration [GO:1903976]; negative regulation of glial cell proliferation [GO:0060253]; negative regulation of matrix metallopeptidase secretion [GO:1904465]; tricarboxy…	cytosol [GO:0005829]; mitochondrion [GO:0005739]; peroxisome [GO:0005777]
P01026	C3	28.0379	28.3715	28.0036	30.2442	29.2027	31.4875	29.6535	31.1119	29.0886	28.4709		C3	1.19051	0.136918	2.28233	amyloid-beta clearance [GO:0097242]; blood coagulation [GO:0007596]; cell surface receptor signaling pathway involved in cell-cell signaling [GO:1905114]; chemotaxis [GO:0006935]; complement activation [GO:0006956]; complement activation, alternative pathway [GO:0006957]; complement activation, classical pathway [GO:0006958]; complement-dependent cytotoxicity [GO:0097278]; complement-mediated syn…	cell surface [GO:0009986]; extracellular region [GO:0005576]; extracellular space [GO:0005615]; protein-containing complex [GO:0032991]
Q9R0T4	Cdh1	30.756	31.0876	31.2804	31.2781	31.2327	30.3766	30.8878	30.5147	30.9466	31.3204		Cdh1	-0.317719	0.141114	1.24636	actin cytoskeleton reorganization [GO:0031532]; adherens junction organization [GO:0034332]; bicellular tight junction assembly [GO:0070830]; calcium-dependent cell-cell adhesion via plasma membrane cell adhesion molecules [GO:0016339]; cell-cell adhesion [GO:0098609]; cell-cell adhesion mediated by cadherin [GO:0044331]; cell-cell adhesion via plasma-membrane adhesion molecules [GO:0098742]; cel…	actin cytoskeleton [GO:0015629]; adherens junction [GO:0005912]; apical junction complex [GO:0043296]; apical part of cell [GO:0045177]; axon [GO:0030424]; axon terminus [GO:0043679]; basolateral plasma membrane [GO:0016323]; catenin complex [GO:0016342]; cell-cell junction [GO:0005911]; cell junction [GO:0030054]; cell periphery [GO:0071944]; cell surface [GO:0009986]; cortical actin cytoskeleto…
P50137	Tkt	22.7031	22.8278	22.5518	22.7555	23.4303	28.866	22.457	28.8628	22.6095	23.5731		Tkt	2.41996	0.142078	5.35157	glyceraldehyde-3-phosphate biosynthetic process [GO:0046166]; pentose-phosphate shunt [GO:0006098]; pentose-phosphate shunt, non-oxidative branch [GO:0009052]; regulation of growth [GO:0040008]; ribose phosphate biosynthetic process [GO:0046390]	endoplasmic reticulum membrane [GO:0005789]; intracellular membrane-bounded organelle [GO:0043231]; peroxisome [GO:0005777]
P10959	Ces1c	28.8621	29.113	29.3867	29.2116	28.8733	29.4647	28.822	29.5603	29.4151	29.5934		Ces1c	0.281761	0.142364	1.21568	lipid catabolic process [GO:0016042]	endoplasmic reticulum [GO:0005783]; endoplasmic reticulum lumen [GO:0005788]; lipid droplet [GO:0005811]
P22282	Andpro	28.737	32.3922	30.8763	29.1651	30.839	21.3701	27.9134	30.3368	28.9817	29.5157		Andpro	-2.77836	0.14929	6.8607	androgen receptor signaling pathway [GO:0030521]; cellular response to dexamethasone stimulus [GO:0071549]; cellular response to testosterone stimulus [GO:0071394]; response to testosterone [GO:0033574]	cytosol [GO:0005829]; extracellular region [GO:0005576]; extracellular space [GO:0005615]; nucleus [GO:0005634]
P48500	Tpi1	24.8688	24.4367	24.7402	25.2876	24.676	25.5582	24.853	25.2441	24.6157	25.7597		Tpi1	0.404275	0.15127	1.32342	carbohydrate metabolic process [GO:0005975]; gluconeogenesis [GO:0006094]; glucose metabolic process [GO:0006006]; glyceraldehyde-3-phosphate biosynthetic process [GO:0046166]; glyceraldehyde-3-phosphate metabolic process [GO:0019682]; glycerol catabolic process [GO:0019563]; glycolytic process [GO:0006096]; methylglyoxal biosynthetic process [GO:0019242]	cytosol [GO:0005829]; nucleus [GO:0005634]
P27274	Cd59	29.2398	29.0054	28.5691	28.8508	27.7142	28.1975	28.4375	28.2747	28.5026	27.5089		Cd59	-0.49164	0.160761	1.40604	negative regulation of activation of membrane attack complex [GO:0001971]; negative regulation of apoptotic process [GO:0043066]; negative regulation of complement activation [GO:0045916]; negative regulation of complement-dependent cytotoxicity [GO:1903660]; positive regulation of T cell proliferation [GO:0042102]; regulation of complement activation [GO:0030449]; regulation of complement-depend…	anchored component of external side of plasma membrane [GO:0031362]; cell surface [GO:0009986]; compact myelin [GO:0043218]; extracellular space [GO:0005615]; plasma membrane [GO:0005886]; sarcolemma [GO:0042383]
P48199	Crp	28.7548	29.1771	29.6924	28.0297	28.6591	29.4417	29.7397	29.523	28.7011	29.4126		Crp	0.501005	0.164903	1.4152	acute-phase response [GO:0006953]; aging [GO:0007568]; cellular response to calcium ion [GO:0071277]; cellular response to interleukin-6 [GO:0071354]; cellular response to nitric oxide [GO:0071732]; complement activation, classical pathway [GO:0006958]; innate immune response [GO:0045087]; negative regulation by host of viral process [GO:0044793]; negative regulation of lipid storage [GO:0010888]…	extracellular space [GO:0005615]; filopodium [GO:0030175]; growth cone [GO:0030426]
P07647	Klk9	31.1787	33.2531	32.3026	31.1774	33.2752	27.9482	30.8027	33.1894	29.9651	31.8027		Klk9	-1.49575	0.171981	2.82011	positive regulation of vasoconstriction [GO:0045907]; regulation of systemic arterial blood pressure [GO:0003073]; zymogen activation [GO:0031638]	secretory granule [GO:0030141]
P06866	Hp	26.9802	26.79	26.6637	28.3842	26.9826	29.3053	27.7693	26.7471	28.2633	27.5711		Hp	0.771075	0.179737	1.70654	acute inflammatory response [GO:0002526]; acute-phase response [GO:0006953]; aging [GO:0007568]; animal organ regeneration [GO:0031100]; defense response to bacterium [GO:0042742]; immune system process [GO:0002376]; liver development [GO:0001889]; negative regulation of hydrogen peroxide catabolic process [GO:2000296]; negative regulation of oxidoreductase activity [GO:0051354]; Notch signaling …	blood microparticle [GO:0072562]; endoplasmic reticulum [GO:0005783]; extracellular space [GO:0005615]; Golgi apparatus [GO:0005794]; haptoglobin-hemoglobin complex [GO:0031838]
P29598	Plau	28.9979	28.9881	29.0171	29.3108	28.8665	28.6591	29.2485	28.5172	29.0808	28.0845		Plau	-0.318041	0.185961	1.24664	angiogenesis [GO:0001525]; cellular response to fluid shear stress [GO:0071498]; cellular response to glucose stimulus [GO:0071333]; cellular response to hepatocyte growth factor stimulus [GO:0035729]; cellular response to hypoxia [GO:0071456]; cellular response to lipopolysaccharide [GO:0071222]; cellular response to organic substance [GO:0071310]; cellular response to staurosporine [GO:0072734]…	cell surface [GO:0009986]; extracellular space [GO:0005615]; membrane [GO:0016020]; protein complex involved in cell-matrix adhesion [GO:0098637]; serine protease inhibitor complex [GO:0097180]; serine-type endopeptidase complex [GO:1905370]
P02764	Orm1	29.1526	28.3968	28.2908	28.6274	28.5265	28.6974	29.0226	28.5736	28.8066	29.2673		Orm1	0.274702	0.194093	1.20974	acute inflammatory response to antigenic stimulus [GO:0002438]; acute-phase response [GO:0006953]; animal organ regeneration [GO:0031100]; cellular response to glucocorticoid stimulus [GO:0071385]; cellular response to growth hormone stimulus [GO:0071378]; cellular response to retinoic acid [GO:0071300]; chronic inflammatory response to antigenic stimulus [GO:0002439]; negative regulation of inte…	extracellular space [GO:0005615]
P14740	Dpp4	29.9028	29.6714	29.3478	29.736	28.7333	28.7889	29.4053	28.7171	29.2846	29.3909		Dpp4	-0.360918	0.196103	1.28424	B-1a B cell differentiation [GO:0002337]; behavioral fear response [GO:0001662]; cell adhesion [GO:0007155]; endothelial cell migration [GO:0043542]; establishment of localization [GO:0051234]; locomotory exploration behavior [GO:0035641]; negative regulation of extracellular matrix disassembly [GO:0010716]; negative regulation of neutrophil chemotaxis [GO:0090024]; positive regulation of cell po…	apical plasma membrane [GO:0016324]; cell surface [GO:0009986]; endocytic vesicle [GO:0030139]; endoplasmic reticulum [GO:0005783]; extracellular region [GO:0005576]; Golgi apparatus [GO:0005794]; integral component of membrane [GO:0016021]; intercellular canaliculus [GO:0046581]; lamellipodium [GO:0030027]; lamellipodium membrane [GO:0031258]; membrane raft [GO:0045121]; plasma membrane [GO:0005…
Q01460	Ctbs	27.4787	27.7498	27.1923	27.1383	26.6546	26.5922	26.8187	25.4797	27.2458	27.3894		Ctbs	-0.537553	0.19986	1.45151	chitin catabolic process [GO:0006032]; oligosaccharide catabolic process [GO:0009313]	lysosome [GO:0005764]
P04639	Apoa1	23.8592	24.0462	23.7446	26.791	25.1413	27.7236	26.2564	26.0407	24.4985	24.6715		Apoa1	1.12168	0.209928	2.176	adrenal gland development [GO:0030325]; animal organ regeneration [GO:0031100]; blood vessel endothelial cell migration [GO:0043534]; cholesterol biosynthetic process [GO:0006695]; cholesterol efflux [GO:0033344]; cholesterol homeostasis [GO:0042632]; cholesterol import [GO:0070508]; cholesterol metabolic process [GO:0008203]; cholesterol transport [GO:0030301]; endothelial cell proliferation [GO…	cell surface [GO:0009986]; chylomicron [GO:0042627]; cytoplasmic vesicle [GO:0031410]; discoidal high-density lipoprotein particle [GO:0034365]; endocytic vesicle [GO:0030139]; extracellular region [GO:0005576]; extracellular space [GO:0005615]; high-density lipoprotein particle [GO:0034364]; intermediate-density lipoprotein particle [GO:0034363]; low-density lipoprotein particle [GO:0034362]; nu…
Q9JJ19	Slc9a3r1	28.1419	28.7684	28.21	29.3488	28.6097	26.8189	28.3322	27.9454	28.7674	28.478		Slc9a3r1	-0.547401	0.211683	1.46145	actin cytoskeleton organization [GO:0030036]; adenylate cyclase-activating dopamine receptor signaling pathway [GO:0007191]; auditory receptor cell stereocilium organization [GO:0060088]; bile acid secretion [GO:0032782]; cellular phosphate ion homeostasis [GO:0030643]; cellular protein localization [GO:0034613]; cerebrospinal fluid circulation [GO:0090660]; cilium organization [GO:0044782]; esta…	apical part of cell [GO:0045177]; apical plasma membrane [GO:0016324]; brush border membrane [GO:0031526]; cell periphery [GO:0071944]; cytoplasm [GO:0005737]; endomembrane system [GO:0012505]; extracellular region [GO:0005576]; filopodium [GO:0030175]; membrane [GO:0016020]; membrane raft [GO:0045121]; microvillus [GO:0005902]; microvillus membrane [GO:0031528]; perinuclear region of cytoplasm […
P26644	Apoh	25.598	25.4564	25.3789	26.9037	25.2533	27.2826	25.7309	27.463	26.7948	25.0101		Apoh	0.7382	0.223113	1.66809	aging [GO:0007568]; animal organ regeneration [GO:0031100]; blood coagulation [GO:0007596]; blood coagulation, intrinsic pathway [GO:0007597]; negative regulation of angiogenesis [GO:0016525]; negative regulation of blood coagulation [GO:0030195]; negative regulation of endothelial cell migration [GO:0010596]; negative regulation of endothelial cell proliferation [GO:0001937]; negative regulation…	cell surface [GO:0009986]; chylomicron [GO:0042627]; cytoplasm [GO:0005737]; extracellular space [GO:0005615]; high-density lipoprotein particle [GO:0034364]; plasma membrane [GO:0005886]; very-low-density lipoprotein particle [GO:0034361]
P08649	C4	26.2976	25.7853	26.0745	26.5881	26.3326	27.9892	25.9021	27.2889	26.4155	26.1652		C4	0.536572	0.227046	1.45052	complement activation [GO:0006956]; complement activation, classical pathway [GO:0006958]; inflammatory response [GO:0006954]; innate immune response [GO:0045087]; positive regulation of apoptotic cell clearance [GO:2000427]	axon [GO:0030424]; dendrite [GO:0030425]; extracellular region [GO:0005576]; extracellular space [GO:0005615]; neuronal cell body [GO:0043025]; synapse [GO:0045202]
Q6Q0N1	Cndp2	24.1404	25.1307	25.3629	26.3955	26.1935	23.5405	24.745	24.3233	24.78	26.0701		Cndp2	-0.752793	0.22778	1.68505	proteolysis [GO:0006508]	cytosol [GO:0005829]; nucleoplasm [GO:0005654]
Q62867	Ggh	29.0731	29.5864	28.9174	29.6341	28.7451	28.4428	29.101	28.8922	29.0002	29.1191		Ggh	-0.280177	0.233934	1.21434	poly-gamma-glutamate metabolic process [GO:0070500]; response to ethanol [GO:0045471]; response to insulin [GO:0032868]; response to xenobiotic stimulus [GO:0009410]; response to zinc ion [GO:0010043]; tetrahydrofolylpolyglutamate metabolic process [GO:0046900]	cytosol [GO:0005829]; extracellular space [GO:0005615]; lysosome [GO:0005764]; melanosome [GO:0042470]; vacuole [GO:0005773]
P36373	Klk7	30.2187	30.8415	30.9327	29.9251	30.9434	30.2142	30.6771	30.3453	29.6318	30.297		Klk7	-0.339199	0.244708	1.26505	positive regulation of antibacterial peptide production [GO:0002803]; regulation of systemic arterial blood pressure [GO:0003073]; zymogen activation [GO:0031638]	cornified envelope [GO:0001533]; epidermal lamellar body [GO:0097209]; extracellular space [GO:0005615]; secretory granule [GO:0030141]
P01946	Hba1	25.6034	23.5331	24.3399	31.5699	25.4507	31.9717	31.3177	28.3525	25.6486	25.4782		Hba1	2.45433	0.247838	5.48058	cellular oxidant detoxification [GO:0098869]; erythrocyte development [GO:0048821]; hydrogen peroxide catabolic process [GO:0042744]; in utero embryonic development [GO:0001701]; negative regulation of blood pressure [GO:0045776]; regulation of sensory perception of pain [GO:0051930]; response to bacterium [GO:0009617]; response to stilbenoid [GO:0035634]	haptoglobin-hemoglobin complex [GO:0031838]; hemoglobin complex [GO:0005833]; synapse [GO:0045202]
P20059	Hpx	31.0577	30.7529	30.5649	31.0578	30.3197	32.0455	30.7883	31.0893	31.1382	30.4968		Hpx	0.361012	0.258876	1.28433	cellular iron ion homeostasis [GO:0006879]; heme metabolic process [GO:0042168]; hemoglobin metabolic process [GO:0020027]; positive regulation of humoral immune response mediated by circulating immunoglobulin [GO:0002925]; positive regulation of immunoglobulin production [GO:0002639]; positive regulation of interferon-gamma-mediated signaling pathway [GO:0060335]; positive regulation of response…	extracellular space [GO:0005615]
Q63041	A1m	32.1445	32.0101	31.8082	32.616	31.9124	32.243	31.809	31.7639	31.7739	31.9004		A1m	-0.200184	0.264616	1.14885	embryo implantation [GO:0007566]	extracellular space [GO:0005615]
P06399-2	Fga	23.0192	22.1276	22.9557	24.3264	23.7216	28.5567	24.0115	24.2572	23.529	22.3783		Fga	1.31645	0.272555	2.49052	acute-phase response [GO:0006953]; adaptive immune response [GO:0002250]; blood coagulation [GO:0007596]; blood coagulation, common pathway [GO:0072377]; blood coagulation, fibrin clot formation [GO:0072378]; cell-matrix adhesion [GO:0007160]; cellular response to granulocyte colony-stimulating factor [GO:1990643]; cellular response to interleukin-6 [GO:0071354]; cellular response to organic cycl…	blood microparticle [GO:0072562]; cell cortex [GO:0005938]; cell surface [GO:0009986]; cytoplasm [GO:0005737]; external side of plasma membrane [GO:0009897]; extracellular space [GO:0005615]; fibrinogen complex [GO:0005577]; platelet alpha granule [GO:0031091]; rough endoplasmic reticulum [GO:0005791]; synapse [GO:0045202]
P83121	P83121	32.0118	31.3067	30.7405	30.7254	30.4138	31.3462	31.9341	28.3543	29.9272	29.5161		P83121	-0.824056	0.274396	1.77038		extracellular region [GO:0005576]
Q64230	Mep1a	30.3602	30.3161	30.2252	30.3699	29.9535	29.7189	30.4166	29.7751	30.2959	30.0937		Mep1a	-0.184956	0.27611	1.13678	proteolysis [GO:0006508]	membrane [GO:0016020]; meprin A complex [GO:0017090]
P27590	Umod	33.6827	31.465	30.4241	32.3201	30.8516	30.2979	32.4974	30.3714	30.6875	30.8321		Umod	-0.811464	0.283025	1.75499	apoptotic process [GO:0006915]; apoptotic signaling pathway [GO:0097190]; autophagy [GO:0006914]; calcium ion homeostasis [GO:0055074]; cellular calcium ion homeostasis [GO:0006874]; cellular chloride ion homeostasis [GO:0030644]; cellular phosphate ion homeostasis [GO:0030643]; cellular response to unfolded protein [GO:0034620]; cellular sodium ion homeostasis [GO:0006883]; chaperone-mediated pr…	anchored component of membrane [GO:0031225]; apical part of cell [GO:0045177]; apical plasma membrane [GO:0016324]; basolateral plasma membrane [GO:0016323]; cell surface [GO:0009986]; ciliary membrane [GO:0060170]; cilium [GO:0005929]; cytoplasmic vesicle [GO:0031410]; endoplasmic reticulum [GO:0005783]; extracellular space [GO:0005615]; Golgi apparatus [GO:0005794]; membrane raft [GO:0045121]; …
O35763	Msn	26.7951	26.8925	25.9983	27.1728	26.7933	25.4546	25.9877	26.9811	26.7706	26.5353		Msn	-0.384545	0.290485	1.30545	cellular response to testosterone stimulus [GO:0071394]; establishment of endothelial barrier [GO:0061028]; establishment of epithelial cell apical/basal polarity [GO:0045198]; gland morphogenesis [GO:0022612]; immunological synapse formation [GO:0001771]; leukocyte cell-cell adhesion [GO:0007159]; leukocyte migration [GO:0050900]; membrane to membrane docking [GO:0022614]; positive regulation of…	adherens junction [GO:0005912]; apical part of cell [GO:0045177]; apical plasma membrane [GO:0016324]; basolateral plasma membrane [GO:0016323]; cell periphery [GO:0071944]; cell surface [GO:0009986]; cell tip [GO:0051286]; cytoplasmic side of plasma membrane [GO:0009898]; cytoskeleton [GO:0005856]; filopodium [GO:0030175]; filopodium membrane [GO:0031527]; microvillus [GO:0005902]; microvillus m…
Q63621	Il1rap	25.0431	25.1091	24.533	23.7407	24.955	25.1168	24.2678	25.407	24.9889	25.4725		Il1rap	0.374426	0.293821	1.29632	cytokine-mediated signaling pathway [GO:0019221]; inflammatory response [GO:0006954]; interleukin-33-mediated signaling pathway [GO:0038172]; positive regulation of interleukin-13 production [GO:0032736]; positive regulation of interleukin-4 production [GO:0032753]; positive regulation of interleukin-5 production [GO:0032754]; positive regulation of interleukin-6 production [GO:0032755]; positive…	cytoplasm [GO:0005737]; glutamatergic synapse [GO:0098978]; integral component of membrane [GO:0016021]; protein-containing complex [GO:0032991]
P22057	Ptgds	29.374	29.2284	29.6975	30.13	30.1868	28.677	29.1498	29.6276	29.9365	29.621		Ptgds	-0.320959	0.305824	1.24916	mast cell degranulation [GO:0043303]; negative regulation of male germ cell proliferation [GO:2000255]; prostaglandin biosynthetic process [GO:0001516]; regulation of circadian sleep/wake cycle, sleep [GO:0045187]; response to glucocorticoid [GO:0051384]	extracellular region [GO:0005576]; extracellular space [GO:0005615]; Golgi apparatus [GO:0005794]; nuclear envelope [GO:0005635]; nuclear membrane [GO:0031965]; perinuclear region of cytoplasm [GO:0048471]; rough endoplasmic reticulum [GO:0005791]
P05371	Clu	26.4537	26.9711	26.2496	26.9482	26.8375	26.8928	26.1343	27.0278	27.3144	27.7271		Clu	0.327286	0.307625	1.25465	aging [GO:0007568]; cell morphogenesis [GO:0000902]; cellular response to growth factor stimulus [GO:0071363]; central nervous system myelin maintenance [GO:0032286]; chaperone-mediated protein complex assembly [GO:0051131]; chaperone-mediated protein folding [GO:0061077]; endocrine pancreas development [GO:0031018]; estrous cycle [GO:0044849]; immune complex clearance [GO:0002434]; intrinsic apo…	aggresome [GO:0016235]; apical dendrite [GO:0097440]; cell surface [GO:0009986]; chromaffin granule [GO:0042583]; cytoplasm [GO:0005737]; cytosol [GO:0005829]; extracellular space [GO:0005615]; growth cone [GO:0030426]; intracellular membrane-bounded organelle [GO:0043231]; mitochondrial inner membrane [GO:0005743]; mitochondrion [GO:0005739]; neurofibrillary tangle [GO:0097418]; neuron projectio…
Q62930	C9	25.918	26.1212	25.7885	26.746	26.563	27.149	25.9266	26.6407	27.3072	25.9536		C9	0.368093	0.314748	1.29065	blood coagulation [GO:0007596]; cell killing [GO:0001906]; complement activation, alternative pathway [GO:0006957]; complement activation, classical pathway [GO:0006958]; cytolysis [GO:0019835]; protein homooligomerization [GO:0051260]	extracellular space [GO:0005615]; membrane attack complex [GO:0005579]; plasma membrane [GO:0005886]
O70513	Lgals3bp	25.307	24.8019	24.8634	24.9306	24.7868	24.8834	24.8497	25.4167	25.1471	25.1436		Lgals3bp	0.150163	0.317295	1.10969	cell adhesion [GO:0007155]	extracellular space [GO:0005615]; membrane [GO:0016020]
P07150	Anxa1	24.0917	26.3763	23.9111	23.2757	26.8664	29.8592	24.3887	30.115	22.0844	26.7838		Anxa1	1.74196	0.338612	3.34488	actin cytoskeleton reorganization [GO:0031532]; adaptive immune response [GO:0002250]; alpha-beta T cell differentiation [GO:0046632]; arachidonic acid secretion [GO:0050482]; cell surface receptor signaling pathway [GO:0007166]; cellular response to glucocorticoid stimulus [GO:0071385]; cellular response to hydrogen peroxide [GO:0070301]; cellular response to vascular endothelial growth factor s…	apical plasma membrane [GO:0016324]; basolateral plasma membrane [GO:0016323]; cell surface [GO:0009986]; cornified envelope [GO:0001533]; cytoplasm [GO:0005737]; early endosome membrane [GO:0031901]; endosome [GO:0005768]; extracellular exosome [GO:0070062]; extracellular space [GO:0005615]; extrinsic component of endosome membrane [GO:0031313]; extrinsic component of external side of plasma mem…
P38918	Akr7a3	25.3943	25.6552	25.4592	25.7968	25.8314	24.7653	25.6365	24.6381	26.471	24.7913		Akr7a3	-0.366957	0.339731	1.28963	aflatoxin catabolic process [GO:0046223]; aflatoxin metabolic process [GO:0046222]	cytoplasm [GO:0005737]; cytosol [GO:0005829]; Golgi apparatus [GO:0005794]
P04276	Gc	27.6685	27.7412	27.3971	27.9117	27.42	29.6995	27.8783	27.9254	28.5897	26.6101		Gc	0.512898	0.347441	1.42691	female pregnancy [GO:0007565]; lactation [GO:0007595]; response to estradiol [GO:0032355]; response to nutrient levels [GO:0031667]; response to steroid hormone [GO:0048545]; vitamin D metabolic process [GO:0042359]	axon [GO:0030424]; cytoplasm [GO:0005737]; cytosol [GO:0005829]; extracellular space [GO:0005615]; perinuclear region of cytoplasm [GO:0048471]
Q920A6	Scpep1	27.4436	26.9199	27.1718	27.9018	26.7617	26.6717	27.3103	26.0931	27.4576	27.089		Scpep1	-0.315405	0.35123	1.24436	blood vessel diameter maintenance [GO:0097746]; negative regulation of blood pressure [GO:0045776]; retinoic acid metabolic process [GO:0042573]	cytosol [GO:0005829]; extracellular region [GO:0005576]
Q6IUU3-2	Qsox1	27.2097	28.0085	28.5127	27.525	27.4657	26.4623	27.0359	26.6071	26.9334	29.0791		Qsox1	-0.520784	0.353591	1.43474	extracellular matrix assembly [GO:0085029]; negative regulation of macroautophagy [GO:0016242]; protein folding [GO:0006457]	extracellular exosome [GO:0070062]; extracellular space [GO:0005615]; Golgi membrane [GO:0000139]; integral component of Golgi membrane [GO:0030173]; intercellular bridge [GO:0045171]
Q641X3	Hexa	24.0697	24.974	24.0723	24.2304	23.7804	23.9387	24.9588	24.1561	24.9407	24.5406		Hexa	0.281612	0.354985	1.21555	adult walking behavior [GO:0007628]; carbohydrate metabolic process [GO:0005975]; cell morphogenesis involved in neuron differentiation [GO:0048667]; ganglioside catabolic process [GO:0006689]; glycosaminoglycan biosynthetic process [GO:0006024]; glycosaminoglycan metabolic process [GO:0030203]; lipid storage [GO:0019915]; locomotory behavior [GO:0007626]; lysosome organization [GO:0007040]; myel…	azurophil granule [GO:0042582]; beta-N-acetylhexosaminidase complex [GO:1905379]; lysosome [GO:0005764]; membrane [GO:0016020]
P07314	Ggt1	29.1053	29.4809	29.995	29.2422	29.9858	28.5294	29.5961	29.1802	29.7639	29.3661		Ggt1	-0.274678	0.35979	1.20972	aging [GO:0007568]; cellular amino acid metabolic process [GO:0006520]; cellular response to oxidative stress [GO:0034599]; cysteine biosynthetic process [GO:0019344]; fatty acid metabolic process [GO:0006631]; glutamate metabolic process [GO:0006536]; glutathione biosynthetic process [GO:0006750]; glutathione catabolic process [GO:0006751]; hepatoblast differentiation [GO:0061017]; hepatocyte di…	extracellular space [GO:0005615]; integral component of plasma membrane [GO:0005887]; plasma membrane [GO:0005886]; vesicle [GO:0031982]
P00787	Ctsb	26.7894	26.9228	26.3264	26.7666	26.5463	27.3317	26.6996	26.5891	26.3329	27.753		Ctsb	0.270967	0.363936	1.20662	autophagy [GO:0006914]; cellular response to mechanical stimulus [GO:0071260]; cellular response to thyroid hormone stimulus [GO:0097067]; collagen catabolic process [GO:0030574]; decidualization [GO:0046697]; epithelial cell differentiation [GO:0030855]; negative regulation of cell death [GO:0060548]; negative regulation of peptidase activity [GO:0010466]; proteolysis [GO:0006508]; proteolysis i…	apical plasma membrane [GO:0016324]; cell surface [GO:0009986]; cytoplasm [GO:0005737]; external side of plasma membrane [GO:0009897]; extracellular region [GO:0005576]; extracellular space [GO:0005615]; lysosome [GO:0005764]; melanosome [GO:0042470]; mitochondrion [GO:0005739]; peptidase inhibitor complex [GO:1904090]; perinuclear region of cytoplasm [GO:0048471]; sarcolemma [GO:0042383]
Q9JIK1-2	Cdhr5	26.3224	26.4693	26.8295	26.6068	26.0697	26.0967	26.6905	26.5015	26.7239	27.6174		Cdhr5	0.266453	0.369703	1.20285	cell adhesion [GO:0007155]; cell differentiation [GO:0030154]; homophilic cell adhesion via plasma membrane adhesion molecules [GO:0007156]; intermicrovillar adhesion [GO:0090675]; regulation of microvillus length [GO:0032532]	apical plasma membrane [GO:0016324]; brush border membrane [GO:0031526]; clathrin-coated pit [GO:0005905]; integral component of membrane [GO:0016021]; integral component of plasma membrane [GO:0005887]; microvillus membrane [GO:0031528]; spanning component of plasma membrane [GO:0044214]
Q00715	Q00715	24.4431	22.6118	23.1368	25.2083	23.2328	26.9217	21.282	28.2085	24.4399	23.7895		Q00715	1.20175	0.384353	2.30019	defense response to bacterium [GO:0042742]; nucleosome assembly [GO:0006334]	nucleoplasm [GO:0005654]; nucleosome [GO:0000786]
O88989	Mdh1	25.8231	26.2305	26.1406	26.2195	26.4749	25.644	26.4671	25.9906	25.7829	26.1825		Mdh1	-0.164318	0.386771	1.12064	malate metabolic process [GO:0006108]; NADH metabolic process [GO:0006734]; NAD metabolic process [GO:0019674]; oxaloacetate metabolic process [GO:0006107]; tricarboxylic acid cycle [GO:0006099]	cytosol [GO:0005829]
Q6MG61	Clic1	25.624	26.2457	24.9849	26.8113	26.4243	24.455	25.8567	25.8565	25.1256	26.603		Clic1	-0.438684	0.393869	1.35537	chloride transport [GO:0006821]; glutathione metabolic process [GO:0006749]; positive regulation of osteoblast differentiation [GO:0045669]; regulation of cell cycle [GO:0051726]; regulation of ion transmembrane transport [GO:0034765]; regulation of mitochondrial membrane potential [GO:0051881]	chloride channel complex [GO:0034707]; cytoplasm [GO:0005737]; extracellular exosome [GO:0070062]; membrane [GO:0016020]; mitochondrion [GO:0005739]; nuclear envelope [GO:0005635]; nuclear membrane [GO:0031965]; nucleus [GO:0005634]; perinuclear region of cytoplasm [GO:0048471]; plasma membrane [GO:0005886]
Q63556	Serpina3m	25.8971	25.854	25.4094	26.5956	25.6683	26.7535	25.6754	25.8264	26.6447	25.8626		Serpina3m	0.267631	0.398466	1.20383	negative regulation of endopeptidase activity [GO:0010951]	extracellular space [GO:0005615]
Q99J86-2	Atrn	25.8353	24.9592	23.7575	24.7227	24.3522	24.8864	24.1793	24.3939	23.5466	24.7649		Atrn	-0.371101	0.400836	1.29334	animal organ morphogenesis [GO:0009887]; cell migration [GO:0016477]; cerebellum development [GO:0021549]; inflammatory response [GO:0006954]; myelination [GO:0042552]; pigmentation [GO:0043473]; regulation of multicellular organism growth [GO:0040014]; response to oxidative stress [GO:0006979]; substrate adhesion-dependent cell spreading [GO:0034446]; tissue development [GO:0009888]	basement membrane [GO:0005604]; cytoplasm [GO:0005737]; extracellular space [GO:0005615]; integral component of membrane [GO:0016021]; plasma membrane [GO:0005886]
P19218	Gp2	25.3143	24.3746	23.9499	24.8683	22.993	24.0078	24.2391	23.613	24.1323	23.6595		Gp2	-0.369688	0.402897	1.29207	antigen transcytosis by M cells in mucosal-associated lymphoid tissue [GO:0002412]; innate immune response [GO:0045087]; neutrophil migration [GO:1990266]	anchored component of external side of plasma membrane [GO:0031362]; apical plasma membrane [GO:0016324]; cell surface [GO:0009986]; endosome [GO:0005768]; extracellular space [GO:0005615]; membrane raft [GO:0045121]; zymogen granule membrane [GO:0042589]
P62630	Eef1a1	26.2053	26.2204	25.3414	26.3144	26.4875	24.6641	25.7694	26.3702	25.616	26.4847		Eef1a1	-0.332941	0.408453	1.25958	aging [GO:0007568]; cellular response to epidermal growth factor stimulus [GO:0071364]; cellular response to nerve growth factor stimulus [GO:1990090]; cellular response to xenobiotic stimulus [GO:0071466]; negative regulation of reactive oxygen species biosynthetic process [GO:1903427]; positive regulation of cell death [GO:0010942]; positive regulation of neuron projection development [GO:00109…	cortical actin cytoskeleton [GO:0030864]; cytoplasm [GO:0005737]; cytosol [GO:0005829]; lysosomal membrane [GO:0005765]; nucleolus [GO:0005730]; nucleus [GO:0005634]; plasma membrane [GO:0005886]; ruffle membrane [GO:0032587]
P21704	Dnase1	31.3323	31.634	31.8031	32.3327	32.139	31.2239	31.8689	31.5913	31.6151	31.9804		Dnase1	-0.192315	0.409457	1.1426	apoptotic process [GO:0006915]; DNA catabolic process [GO:0006308]; DNA catabolic process, endonucleolytic [GO:0000737]; neutrophil activation involved in immune response [GO:0002283]; regulation of acute inflammatory response [GO:0002673]; regulation of neutrophil mediated cytotoxicity [GO:0070948]	extracellular region [GO:0005576]; nuclear envelope [GO:0005635]; nucleus [GO:0005634]; zymogen granule [GO:0042588]
P02781	Psbpc2	30.5876	32.8991	31.1018	26.8657	30.8052	23.7981	30.6719	31.203	28.7663	30.6003		Psbpc2	-1.44398	0.416215	2.72071		extracellular region [GO:0005576]; extracellular space [GO:0005615]
Q99041	Tgm4	27.0925	29.2058	33.3629	29.8978	32.8314	19.9861	31.5158	27.5458	30.9529	31.6667		Tgm4	-2.14464	0.417134	4.42182	mating plug formation [GO:0042628]; peptide cross-linking [GO:0018149]	anchored component of membrane [GO:0031225]; collagen-containing extracellular matrix [GO:0062023]; cytoplasm [GO:0005737]; extracellular region [GO:0005576]; Golgi apparatus [GO:0005794]; plasma membrane [GO:0005886]
P02091	Hbb	26.796	24.8656	26.7699	32.7332	27.6837	33.1831	32.1289	29.4242	25.549	26.6014		Hbb	1.60763	0.4432	3.04752	cellular oxidant detoxification [GO:0098869]; erythrocyte development [GO:0048821]; glutathione metabolic process [GO:0006749]; hemopoiesis [GO:0030097]; hydrogen peroxide catabolic process [GO:0042744]; nitric oxide transport [GO:0030185]; oxygen transport [GO:0015671]; positive regulation of cell death [GO:0010942]; regulation of eIF2 alpha phosphorylation by heme [GO:0010999]; renal absorption…	extracellular space [GO:0005615]; haptoglobin-hemoglobin complex [GO:0031838]; hemoglobin complex [GO:0005833]
P00689	Amy2	32.0698	31.463	31.8086	32.1159	32.3498	31.1008	31.8709	31.2181	32.6213	31.8054		Amy2	-0.238102	0.46606	1.17944	carbohydrate catabolic process [GO:0016052]	extracellular space [GO:0005615]
P62986	Uba52	26.4473	27.605	26.9833	26.5876	27.3121	26.9066	27.2669	27.1715	27.2032	27.2504		Uba52	0.172663	0.467365	1.12714	modification-dependent protein catabolic process [GO:0019941]; protein ubiquitination [GO:0016567]; response to insecticide [GO:0017085]; translation [GO:0006412]	cytoplasm [GO:0005737]; cytosolic large ribosomal subunit [GO:0022625]; cytosolic ribosome [GO:0022626]; cytosolic small ribosomal subunit [GO:0022627]; nucleus [GO:0005634]; synapse [GO:0045202]
P97546-3	Nptn	25.5306	25.1025	25.1644	25.8517	24.9118	24.9487	25.2127	24.7778	25.6488	25.1522		Nptn	-0.164149	0.48316	1.1205	axon guidance [GO:0007411]; cellular calcium ion homeostasis [GO:0006874]; dendrite self-avoidance [GO:0070593]; excitatory synapse assembly [GO:1904861]; homophilic cell adhesion via plasma membrane adhesion molecules [GO:0007156]; long-term synaptic potentiation [GO:0060291]; modulation of chemical synaptic transmission [GO:0050804]; negative regulation of cytokine production [GO:0001818]; posi…	axon [GO:0030424]; cell surface [GO:0009986]; dendrite [GO:0030425]; GABA-ergic synapse [GO:0098982]; glutamatergic synapse [GO:0098978]; immunological synapse [GO:0001772]; inhibitory synapse [GO:0060077]; integral component of membrane [GO:0016021]; integral component of postsynaptic density membrane [GO:0099061]; integral component of presynaptic active zone membrane [GO:0099059]; plasma membr…
P04937-4	Fn1	27.8403	27.8168	27.7306	28.0387	27.3834	28.9023	27.5648	27.794	25.9102	26.7784		Fn1	-0.372016	0.489468	1.29416	acute-phase response [GO:0006953]; angiogenesis [GO:0001525]; biological process involved in interaction with symbiont [GO:0051702]; blood coagulation, fibrin clot formation [GO:0072378]; calcium-independent cell-matrix adhesion [GO:0007161]; cell activation [GO:0001775]; cell adhesion [GO:0007155]; cell-matrix adhesion [GO:0007160]; cell-substrate junction assembly [GO:0007044]; cellular respons…	apical plasma membrane [GO:0016324]; basement membrane [GO:0005604]; collagen-containing extracellular matrix [GO:0062023]; endoplasmic reticulum-Golgi intermediate compartment [GO:0005793]; extracellular exosome [GO:0070062]; extracellular matrix [GO:0031012]; extracellular space [GO:0005615]; fibrinogen complex [GO:0005577]
Q64319	Slc3a1	29.066	29.4756	28.3917	29.5009	28.2006	28.2608	29.1026	27.7727	29.0181	29.1165		Slc3a1	-0.272793	0.497197	1.20814	amino acid transport [GO:0006865]; aspartate transmembrane transport [GO:0015810]; carbohydrate metabolic process [GO:0005975]; gene expression [GO:0010467]; L-cystine transport [GO:0015811]; L-glutamate transmembrane transport [GO:0015813]	apical plasma membrane [GO:0016324]; brush border membrane [GO:0031526]; integral component of plasma membrane [GO:0005887]; plasma membrane [GO:0005886]; vacuolar membrane [GO:0005774]
Q499T2	Ifi30	26.3368	26.5237	26.2748	25.63	26.3795	24.9489	26.4247	26.0278	26.1473	26.4698		Ifi30	-0.22528	0.497552	1.169	antigen processing and presentation of exogenous peptide antigen via MHC class I [GO:0042590]; antigen processing and presentation of exogenous peptide antigen via MHC class II [GO:0019886]; negative regulation of fibroblast proliferation [GO:0048147]; protein stabilization [GO:0050821]	cell junction [GO:0030054]; cytosol [GO:0005829]; extracellular region [GO:0005576]; lysosome [GO:0005764]
P00758	Ngfg	30.4643	31.6116	31.027	31.3287	32.1327	30.7114	31.3719	29.2054	31.7245	31.6519		Ngfg	-0.379874	0.505284	1.30123	regulation of systemic arterial blood pressure [GO:0003073]; zymogen activation [GO:0031638]	secretory granule [GO:0030141]
Q07936	Anxa2	23.3258	22.8631	23.3639	22.9871	23.8259	24.9032	23.0573	25.0118	22.1498	23.2339		Anxa2	0.398036	0.513039	1.31771	angiogenesis [GO:0001525]; body fluid secretion [GO:0007589]; collagen fibril organization [GO:0030199]; fibrinolysis [GO:0042730]; membrane raft assembly [GO:0001765]; mRNA transcription by RNA polymerase II [GO:0042789]; negative regulation of low-density lipoprotein particle receptor catabolic process [GO:0032804]; negative regulation of receptor internalization [GO:0002091]; osteoclast develo…	AnxA2-p11 complex [GO:1990665]; basement membrane [GO:0005604]; basolateral plasma membrane [GO:0016323]; cell cortex [GO:0005938]; cell surface [GO:0009986]; cornified envelope [GO:0001533]; cytoplasm [GO:0005737]; cytosol [GO:0005829]; early endosome [GO:0005769]; endosome [GO:0005768]; extracellular exosome [GO:0070062]; extracellular space [GO:0005615]; extrinsic component of plasma membrane …
P41562	Idh1	24.3646	24.1534	24.4314	22.9084	25.2496	24.0497	24.3771	24.1312	25.2963	24.7517		Idh1	0.299726	0.51643	1.23091	2-oxoglutarate metabolic process [GO:0006103]; female gonad development [GO:0008585]; glutathione metabolic process [GO:0006749]; glyoxylate cycle [GO:0006097]; isocitrate metabolic process [GO:0006102]; NADP metabolic process [GO:0006739]; regulation of phospholipid biosynthetic process [GO:0071071]; regulation of phospholipid catabolic process [GO:0060696]; response to organic cyclic compound […	cytosol [GO:0005829]; mitochondrion [GO:0005739]; peroxisome [GO:0005777]
P19804	Nme2	24.718	25.587	24.9796	24.571	25.1331	25.6699	24.8203	24.5947	24.6468	24.258		Nme2	-0.199806	0.517584	1.14854	adenylate cyclase-activating G protein-coupled receptor signaling pathway [GO:0007189]; cellular response to fatty acid [GO:0071398]; cellular response to glucose stimulus [GO:0071333]; cellular response to oxidative stress [GO:0034599]; CTP biosynthetic process [GO:0006241]; GTP biosynthetic process [GO:0006183]; integrin-mediated signaling pathway [GO:0007229]; negative regulation of apoptotic …	cell periphery [GO:0071944]; cytoplasm [GO:0005737]; lamellipodium [GO:0030027]; mitochondrial membrane [GO:0031966]; nucleus [GO:0005634]; perinuclear region of cytoplasm [GO:0048471]; ruffle [GO:0001726]
P36953	Afm	29.6732	30.2442	30.23	30.7048	30.0556	30.1979	29.5521	30.246	30.3804	29.7634		Afm	-0.153571	0.521856	1.11232	protein stabilization [GO:0050821]; protein transport within extracellular region [GO:0071693]; vitamin transport [GO:0051180]	cytoplasm [GO:0005737]; extracellular space [GO:0005615]
P07861	Mme	28.5639	30.0373	27.8303	27.857	29.2735	26.0402	28.1555	29.4039	27.9715	29.5264		Mme	-0.4929	0.53438	1.40727	aging [GO:0007568]; amyloid-beta clearance [GO:0097242]; amyloid-beta clearance by cellular catabolic process [GO:0150094]; amyloid-beta metabolic process [GO:0050435]; cellular response to cytokine stimulus [GO:0071345]; cellular response to UV-A [GO:0071492]; cellular response to UV-B [GO:0071493]; creatinine metabolic process [GO:0046449]; kidney development [GO:0001822]; learning or memory [G…	axon [GO:0030424]; brush border [GO:0005903]; cytoplasm [GO:0005737]; cytoplasmic vesicle [GO:0031410]; dendrite [GO:0030425]; early endosome [GO:0005769]; integral component of membrane [GO:0016021]; membrane [GO:0016020]; membrane raft [GO:0045121]; neuronal cell body [GO:0043025]; neuron projection terminus [GO:0044306]; plasma membrane [GO:0005886]; presynapse [GO:0098793]; synapse [GO:004520…
P02767	Ttr	28.4765	28.099	27.1177	27.9501	27.8053	29.489	27.7617	27.6308	28.0203	27.8576		Ttr	0.262136	0.537407	1.19925	purine nucleobase metabolic process [GO:0006144]; retinol metabolic process [GO:0042572]; thyroid hormone metabolic process [GO:0042403]; thyroid hormone transport [GO:0070327]	extracellular space [GO:0005615]; protein-containing complex [GO:0032991]
P06760	Gusb	27.9121	29.9538	30.1326	30.7088	29.2968	25.8745	31.1639	29.6558	28.9744	29.3797		Gusb	-0.591158	0.566965	1.50646	carbohydrate metabolic process [GO:0005975]; glucuronoside catabolic process [GO:0019391]	extracellular space [GO:0005615]; lysosome [GO:0005764]
Q01177	Plg	29.8563	29.3264	29.231	29.9074	29.0566	30.5413	29.289	29.5758	29.5994	29.1789		Plg	0.161322	0.599641	1.11831	biological process involved in interaction with symbiont [GO:0051702]; blood coagulation [GO:0007596]; extracellular matrix disassembly [GO:0022617]; fibrinolysis [GO:0042730]; labyrinthine layer blood vessel development [GO:0060716]; mononuclear cell migration [GO:0071674]; muscle cell cellular homeostasis [GO:0046716]; myoblast differentiation [GO:0045445]; negative regulation of cell-substrate…	cell surface [GO:0009986]; extracellular space [GO:0005615]; extrinsic component of external side of plasma membrane [GO:0031232]; extrinsic component of plasma membrane [GO:0019897]; glutamatergic synapse [GO:0098978]; intracellular membrane-bounded organelle [GO:0043231]; plasma membrane [GO:0005886]; Schaffer collateral - CA1 synapse [GO:0098685]
Q6P7S1	Asah1	24.605	23.8569	23.9732	22.4594	23.6358	25.1041	23.832	23.3209	23.7332	23.7688		Asah1	0.245738	0.609811	1.1857	cellular response to tumor necrosis factor [GO:0071356]; ceramide biosynthetic process [GO:0046513]; ceramide catabolic process [GO:0046514]; fatty acid metabolic process [GO:0006631]; keratinocyte differentiation [GO:0030216]; lung development [GO:0030324]; regulation of programmed necrotic cell death [GO:0062098]; regulation of steroid biosynthetic process [GO:0050810]; response to organic subs…	extracellular space [GO:0005615]; lysosome [GO:0005764]; nucleus [GO:0005634]
P63259	Actg1	29.9811	30.5129	29.8577	31.2518	31.4088	30.0845	30.1171	30.866	30.3556	30.7092		Actg1	-0.175991	0.632796	1.12974	angiogenesis [GO:0001525]; cellular response to interferon-gamma [GO:0071346]; morphogenesis of a polarized epithelium [GO:0001738]; positive regulation of cell migration [GO:0030335]; positive regulation of gene expression [GO:0010628]; positive regulation of wound healing [GO:0090303]; protein localization to bicellular tight junction [GO:1902396]; regulation of focal adhesion assembly [GO:0051…	actin cytoskeleton [GO:0015629]; actin filament [GO:0005884]; apical junction complex [GO:0043296]; apical part of cell [GO:0045177]; basal body patch [GO:0120220]; calyx of Held [GO:0044305]; cell-cell junction [GO:0005911]; cytoskeleton [GO:0005856]; cytosol [GO:0005829]; dense body [GO:0097433]; extracellular exosome [GO:0070062]; filamentous actin [GO:0031941]; focal adhesion [GO:0005925]; my…
P15684	Anpep	29.6276	29.7851	28.3297	29.618	28.9791	28.7741	29.2651	28.6112	29.2071	29.6933		Anpep	-0.157763	0.648371	1.11556	angiogenesis [GO:0001525]; cell differentiation [GO:0030154]; negative regulation of renal sodium excretion [GO:0035814]; peptide catabolic process [GO:0043171]; proteolysis [GO:0006508]; regulation of blood pressure [GO:0008217]; signal transduction [GO:0007165]	brush border membrane [GO:0031526]; cytoplasm [GO:0005737]; endoplasmic reticulum-Golgi intermediate compartment [GO:0005793]; external side of plasma membrane [GO:0009897]; extracellular exosome [GO:0070062]; extracellular space [GO:0005615]; integral component of membrane [GO:0016021]; plasma membrane [GO:0005886]
P01835	P01835	33.165	32.7306	33.7081	33.3236	32.9147	33.0267	33.1428	33.3718	32.9223	32.9402		P01835	-0.0876602	0.653649	1.06265	regulation of immune response [GO:0050776]
P02650	Apoe	28.1189	28.1632	28.4245	28.9965	28.7869	28.8213	28.5819	28.0493	29.0945	28.4902		Apoe	0.109422	0.667201	1.0788	aging [GO:0007568]; AMPA glutamate receptor clustering [GO:0097113]; amyloid precursor protein metabolic process [GO:0042982]; artery morphogenesis [GO:0048844]; cellular calcium ion homeostasis [GO:0006874]; cellular response to cholesterol [GO:0071397]; cellular response to ethanol [GO:0071361]; cellular response to growth factor stimulus [GO:0071363]; cellular response to interleukin-1 [GO:007…	cell surface [GO:0009986]; chylomicron [GO:0042627]; cytoplasm [GO:0005737]; dendrite [GO:0030425]; discoidal high-density lipoprotein particle [GO:0034365]; endoplasmic reticulum [GO:0005783]; endosome [GO:0005768]; extracellular matrix [GO:0031012]; extracellular region [GO:0005576]; extracellular space [GO:0005615]; extrinsic component of external side of plasma membrane [GO:0031232]; glutamat…
B0BNN3	Ca1	25.3397	24.2694	24.2286	26.852	25.1848	26.2995	24.739	25.3872	23.849	24.1726		Ca1	-0.285461	0.671436	1.2188	one-carbon metabolic process [GO:0006730]	cytoplasm [GO:0005737]
O35217	Minpp1	26.0891	26.0831	25.6427	26.3469	26.0138	25.8539	25.7518	25.5036	25.8715	26.6897		Minpp1	-0.101035	0.6719	1.07254	phosphatidylinositol-mediated signaling [GO:0048015]	endoplasmic reticulum lumen [GO:0005788]
P32038	Cfd	26.8022	25.8977	25.5579	26.8318	26.148	26.3042	25.83	26.6447	26.983	26.1773		Cfd	0.140338	0.671968	1.10216	complement activation, alternative pathway [GO:0006957]; Notch signaling pathway [GO:0007219]; response to bacterium [GO:0009617]; retina development in camera-type eye [GO:0060041]; vascular associated smooth muscle cell differentiation [GO:0035886]	extracellular space [GO:0005615]
P16617	Pgk1	24.3068	24.4631	24.7961	25.6156	26.0382	24.4458	24.8006	25.0482	24.6528	25.5299		Pgk1	-0.148497	0.709255	1.10841	carbohydrate metabolic process [GO:0005975]; cellular response to hypoxia [GO:0071456]; epithelial cell differentiation [GO:0030855]; gluconeogenesis [GO:0006094]; glycolytic process [GO:0006096]; negative regulation of angiogenesis [GO:0016525]; phosphorylation [GO:0016310]; plasminogen activation [GO:0031639]	cytosol [GO:0005829]; extracellular space [GO:0005615]; membrane raft [GO:0045121]
P19468	Gclc	26.0123	27.3993	26.3175	27.8159	27.5503	25.7368	26.9134	26.632	27.0109	27.8687		Gclc	-0.186683	0.716421	1.13814	aging [GO:0007568]; blood vessel diameter maintenance [GO:0097746]; cell redox homeostasis [GO:0045454]; cellular response to fibroblast growth factor stimulus [GO:0044344]; cellular response to follicle-stimulating hormone stimulus [GO:0071372]; cellular response to glucose stimulus [GO:0071333]; cellular response to hepatocyte growth factor stimulus [GO:0035729]; cellular response to insulin st…	cytosol [GO:0005829]; glutamate-cysteine ligase complex [GO:0017109]; mitochondrion [GO:0005739]
P80067	Ctsc	26.7556	25.9321	24.6696	25.1493	24.8142	26.4789	25.7488	25.0256	24.7173	26.1867		Ctsc	0.167336	0.753086	1.12298	aging [GO:0007568]; negative regulation of myelination [GO:0031642]; positive regulation of apoptotic signaling pathway [GO:2001235]; positive regulation of microglial cell activation [GO:1903980]; positive regulation of proteolysis involved in cellular protein catabolic process [GO:1903052]; proteolysis [GO:0006508]; proteolysis involved in cellular protein catabolic process [GO:0051603]; respon…	centrosome [GO:0005813]; cytoplasm [GO:0005737]; endoplasmic reticulum [GO:0005783]; extracellular space [GO:0005615]; Golgi apparatus [GO:0005794]; lysosome [GO:0005764]; nucleoplasm [GO:0005654]
P27139	Ca2	24.8295	24.6996	27.0967	26.9427	26.5985	25.8512	26.9901	25.1423	27.434	25.6854		Ca2	0.187212	0.789017	1.13856	angiotensin-activated signaling pathway [GO:0038166]; carbon dioxide transport [GO:0015670]; cellular response to fluid shear stress [GO:0071498]; kidney development [GO:0001822]; morphogenesis of an epithelium [GO:0002009]; odontogenesis of dentin-containing tooth [GO:0042475]; one-carbon metabolic process [GO:0006730]; osteoclast differentiation [GO:0030316]; positive regulation of bone resorpt…	apical part of cell [GO:0045177]; axon [GO:0030424]; basolateral plasma membrane [GO:0016323]; cytoplasm [GO:0005737]; cytosol [GO:0005829]; extracellular space [GO:0005615]; microvillus [GO:0005902]; myelin sheath [GO:0043209]; plasma membrane [GO:0005886]
P24090	Ahsg	28.3926	28.4879	28.4567	28.7781	27.9612	29.994	28.4731	29.1278	28.0761	27.0941		Ahsg	0.13773	0.792244	1.10017	acute-phase response [GO:0006953]; animal organ regeneration [GO:0031100]; cellular response to insulin stimulus [GO:0032869]; cerebral cortex development [GO:0021987]; male gonad development [GO:0008584]; negative regulation of bone mineralization [GO:0030502]; negative regulation of cell growth [GO:0030308]; negative regulation of endopeptidase activity [GO:0010951]; negative regulation of insu…	collagen-containing extracellular matrix [GO:0062023]; extracellular matrix [GO:0031012]; extracellular region [GO:0005576]; extracellular space [GO:0005615]; protein-containing complex [GO:0032991]
P09006	Serpina3n	26.9562	27.3007	26.8017	27.8218	26.5127	28.4018	26.9799	27.7551	25.5871	27.3612		Serpina3n	0.138401	0.797442	1.10068	cellular response to cAMP [GO:0071320]; cellular response to glucocorticoid stimulus [GO:0071385]; cellular response to interferon-gamma [GO:0071346]; cellular response to interleukin-1 [GO:0071347]; cellular response to interleukin-6 [GO:0071354]; inflammatory response [GO:0006954]; negative regulation of endopeptidase activity [GO:0010951]; response to bacterium [GO:0009617]; response to cytoki…	extracellular region [GO:0005576]; extracellular space [GO:0005615]
O70244	Cubn	26.7057	24.7448	25.8621	25.1278	23.4599	26.092	25.2983	24.8266	25.6597	24.7658		Cubn	0.148426	0.810924	1.10836	cholesterol metabolic process [GO:0008203]; cobalamin catabolic process [GO:0042366]; cobalamin metabolic process [GO:0009235]; cobalamin transport [GO:0015889]; endocytic hemoglobin import into cell [GO:0020028]; in utero embryonic development [GO:0001701]; lipoprotein transport [GO:0042953]; receptor-mediated endocytosis [GO:0006898]; response to bacterium [GO:0009617]; response to nutrient [GO…	apical part of cell [GO:0045177]; apical plasma membrane [GO:0016324]; brush border [GO:0005903]; brush border membrane [GO:0031526]; clathrin-coated pit [GO:0005905]; coated vesicle [GO:0030135]; cytoplasm [GO:0005737]; endocytic vesicle [GO:0030139]; endocytic vesicle membrane [GO:0030666]; endoplasmic reticulum [GO:0005783]; endosome [GO:0005768]; endosome membrane [GO:0010008]; extracellular …
P00884	Aldob	25.3456	26.4154	25.6802	26.8092	27.0711	24.9829	26.1393	26.2137	26.7468	26.6974		Aldob	-0.108305	0.818636	1.07796	cellular response to extracellular stimulus [GO:0031668]; cellular response to insulin stimulus [GO:0032869]; fructose 1,6-bisphosphate metabolic process [GO:0030388]; fructose metabolic process [GO:0006000]; glycolytic process [GO:0006096]; liver development [GO:0001889]; NADH oxidation [GO:0006116]; positive regulation of ATP-dependent activity [GO:0032781]; response to amino acid [GO:0043200];…	centriolar satellite [GO:0034451]; cytoplasm [GO:0005737]; cytosol [GO:0005829]; intracellular membrane-bounded organelle [GO:0043231]; lysosome [GO:0005764]; microtubule organizing center [GO:0005815]; nucleus [GO:0005634]; perinuclear region of cytoplasm [GO:0048471]; plasma membrane [GO:0005886]; rough endoplasmic reticulum membrane [GO:0030867]; smooth endoplasmic reticulum membrane [GO:00308…
P09034	Ass1	22.9276	23.4343	23.0508	24.6605	24.1911	22.7863	23.1971	23.8118	23.2493	24.6688		Ass1	-0.110225	0.819291	1.0794	acute-phase response [GO:0006953]; aging [GO:0007568]; arginine biosynthetic process [GO:0006526]; argininosuccinate metabolic process [GO:0000053]; aspartate metabolic process [GO:0006531]; cellular response to amine stimulus [GO:0071418]; cellular response to amino acid stimulus [GO:0071230]; cellular response to ammonium ion [GO:0071242]; cellular response to cAMP [GO:0071320]; cellular respon…	cell body fiber [GO:0070852]; cytoplasm [GO:0005737]; cytosol [GO:0005829]; endoplasmic reticulum [GO:0005783]; lysosome [GO:0005764]; mitochondrial outer membrane [GO:0005741]; mitochondrion [GO:0005739]; neuronal cell body [GO:0043025]; neuron projection [GO:0043005]; nucleoplasm [GO:0005654]; nucleus [GO:0005634]; perikaryon [GO:0043204]
P05544	Serpina3l	33.249	32.8836	32.854	32.8615	32.7248	32.7073	32.9289	32.8836	32.8055	33.1242		Serpina3l	-0.0247134	0.83133	1.01728	negative regulation of endopeptidase activity [GO:0010951]	extracellular space [GO:0005615]
P18292	F2	27.7182	27.5911	27.8386	27.7153	26.8847	28.0439	27.5509	27.5538	27.5866	26.7165		F2	-0.0592623	0.834391	1.04193	acute-phase response [GO:0006953]; antimicrobial humoral immune response mediated by antimicrobial peptide [GO:0061844]; blood coagulation [GO:0007596]; cell surface receptor signaling pathway [GO:0007166]; cellular response to mechanical stimulus [GO:0071260]; cytolysis by host of symbiont cells [GO:0051838]; fibrinolysis [GO:0042730]; negative regulation of astrocyte differentiation [GO:0048712…	collagen-containing extracellular matrix [GO:0062023]; extracellular space [GO:0005615]
P07632	Sod1	29.2249	29.8586	29.3087	29.8312	29.2263	28.7276	29.337	29.8139	29.9892	29.3338		Sod1	-0.049657	0.855579	1.03502	aging [GO:0007568]; anterograde axonal transport [GO:0008089]; auditory receptor cell stereocilium organization [GO:0060088]; cell aging [GO:0007569]; cellular iron ion homeostasis [GO:0006879]; cellular response to ATP [GO:0071318]; cellular response to cadmium ion [GO:0071276]; cellular response to oxidative stress [GO:0034599]; cellular response to potassium ion [GO:0035865]; embryo implantati…	axon cytoplasm [GO:1904115]; cytoplasm [GO:0005737]; cytoplasmic vesicle [GO:0031410]; cytosol [GO:0005829]; dendrite cytoplasm [GO:0032839]; dense core granule [GO:0031045]; extracellular region [GO:0005576]; extracellular space [GO:0005615]; lysosome [GO:0005764]; mitochondrial intermembrane space [GO:0005758]; mitochondrion [GO:0005739]; neuronal cell body [GO:0043025]; neuron projection [GO:0…
P48508	Gclm	24.3394	25.4718	24.992	23.7587	25.7305	24.2862	25.0421	24.3435	25.5264	24.7353		Gclm	-0.0717677	0.871546	1.051	aging [GO:0007568]; apoptotic mitochondrial changes [GO:0008637]; blood vessel diameter maintenance [GO:0097746]; cellular response to fibroblast growth factor stimulus [GO:0044344]; cellular response to follicle-stimulating hormone stimulus [GO:0071372]; cellular response to glucose stimulus [GO:0071333]; cellular response to hepatocyte growth factor stimulus [GO:0035729]; cellular response to l…	glutamate-cysteine ligase complex [GO:0017109]
P20767	P20767	28.5803	28.6805	30.1253	29.6007	29.8642	29.6032	29.1159	29.4956	29.6703	29.2325		P20767	0.0533177	0.876175	1.03765	B cell receptor signaling pathway [GO:0050853]; complement activation, classical pathway [GO:0006958]; defense response to bacterium [GO:0042742]; innate immune response [GO:0045087]; phagocytosis, engulfment [GO:0006911]; phagocytosis, recognition [GO:0006910]; positive regulation of B cell activation [GO:0050871]	external side of plasma membrane [GO:0009897]; immunoglobulin complex, circulating [GO:0042571]
P24268	Ctsd	27.1519	27.6116	27.9786	27.5201	27.1957	27.1061	27.2925	27.7349	27.5154	27.6575		Ctsd	-0.0302903	0.877648	1.02122	autophagosome assembly [GO:0000045]; lipoprotein catabolic process [GO:0042159]; positive regulation of apoptotic process [GO:0043065]; positive regulation of cysteine-type endopeptidase activity involved in apoptotic process [GO:0043280]; proteolysis [GO:0006508]; regulation of establishment of protein localization [GO:0070201]; response to nutrient levels [GO:0031667]	endosome membrane [GO:0010008]; extracellular space [GO:0005615]; lysosomal membrane [GO:0005765]; lysosome [GO:0005764]; melanosome [GO:0042470]; membrane raft [GO:0045121]
Q6MG71	Slc44a4	26.5517	26.6337	25.4116	23.6468	25.7042	25.5897	25.8565	25.8951	24.8511	25.357		Slc44a4	-0.0797314	0.892778	1.05682	acetylcholine biosynthetic process [GO:0008292]; acetylcholine secretion [GO:0061526]; choline transport [GO:0015871]; neuromast hair cell development [GO:0035675]; otolith formation [GO:0032475]; positive regulation of cell growth [GO:0030307]; thiamine pyrophosphate transmembrane transport [GO:0030974]; transmembrane transport [GO:0055085]	apical plasma membrane [GO:0016324]; integral component of membrane [GO:0016021]; membrane [GO:0016020]; plasma membrane [GO:0005886]
P51635	Akr1a1	25.3749	26.6688	26.3899	27.0428	26.5332	25.2181	26.6013	26.104	26.7146	27.0865		Akr1a1	-0.0570273	0.896882	1.04032	aldehyde catabolic process [GO:0046185]; cellular detoxification of aldehyde [GO:0110095]; daunorubicin metabolic process [GO:0044597]; D-glucuronate catabolic process [GO:0042840]; doxorubicin metabolic process [GO:0044598]; L-ascorbic acid biosynthetic process [GO:0019853]; lipid metabolic process [GO:0006629]	apical plasma membrane [GO:0016324]; cytosol [GO:0005829]; synapse [GO:0045202]
P23785	Grn	27.21	27.0518	26.2817	26.3392	25.5324	26.4573	26.3365	26.0719	27.4343	25.8956		Grn	-0.0439077	0.915928	1.0309	astrocyte activation involved in immune response [GO:0002265]; blastocyst hatching [GO:0001835]; chondrocyte proliferation [GO:0035988]; embryo implantation [GO:0007566]; locomotory exploration behavior [GO:0035641]; lysosomal lumen acidification [GO:0007042]; lysosomal protein catabolic process [GO:1905146]; lysosomal transport [GO:0007041]; lysosome organization [GO:0007040]; male mating behavi…	endoplasmic reticulum [GO:0005783]; extracellular region [GO:0005576]; extracellular space [GO:0005615]; Golgi apparatus [GO:0005794]; late endosome [GO:0005770]; lysosomal membrane [GO:0005765]; lysosome [GO:0005764]; membrane [GO:0016020]; plasma membrane [GO:0005886]; presynapse [GO:0098793]; trans-Golgi network [GO:0005802]; vesicle [GO:0031982]
Q9JJ40	Pdzk1	28.1005	28.3722	27.6389	28.7723	28.7172	26.9697	28.5179	27.82	29.0872	29.0388		Pdzk1	-0.0334821	0.942791	1.02348	carnitine transport [GO:0015879]; cholesterol transport [GO:0030301]; intracellular transport [GO:0046907]; in utero embryonic development [GO:0001701]; positive regulation of cation transmembrane transport [GO:1904064]; positive regulation of ion transmembrane transporter activity [GO:0032414]; positive regulation of protein localization to membrane [GO:1905477]; positive regulation of protein t…	apical plasma membrane [GO:0016324]; brush border [GO:0005903]; brush border membrane [GO:0031526]; membrane raft [GO:0045121]; microvillus membrane [GO:0031528]; plasma membrane [GO:0005886]
Q6AYD4	Esam	26.7033	26.1979	25.5864	26.7908	26.4577	26.5942	25.8952	25.7585	27.1135	26.2654		Esam	-0.0218831	0.948306	1.01528	bicellular tight junction assembly [GO:0070830]; cell-cell adhesion [GO:0098609]; cellular protein localization [GO:0034613]; homophilic cell adhesion via plasma membrane adhesion molecules [GO:0007156]; regulation of actin cytoskeleton reorganization [GO:2000249]; regulation of actin filament polymerization [GO:0030833]	adherens junction [GO:0005912]; bicellular tight junction [GO:0005923]; cell-cell junction [GO:0005911]; integral component of membrane [GO:0016021]; plasma membrane [GO:0005886]; protein-containing complex [GO:0032991]
P47967	Lgals5	25.4295	25.2565	25.1931	25.8879	25.3118	25.0958	25.4511	26.9933	24.6896	24.946		Lgals5	0.0194258	0.964833	1.01356	negative regulation of CD4-positive, alpha-beta T cell proliferation [GO:2000562]; negative regulation of interferon-gamma production [GO:0032689]; positive regulation of gene expression [GO:0010628]; positive regulation of T cell apoptotic process [GO:0070234]	cytosol [GO:0005829]; nucleus [GO:0005634]
Q6DGG1	Abhd14b	26.3159	27.2963	26.7091	25.8657	26.714	26.6651	26.8772	26.4059	26.4342	26.4678		Abhd14b	-0.0101556	0.969046	1.00706	positive regulation of transcription by RNA polymerase II [GO:0045944]	cytoplasm [GO:0005737]; cytosol [GO:0005829]; nucleolus [GO:0005730]; nucleoplasm [GO:0005654]; nucleus [GO:0005634]
P63018	Hspa8	26.6811	27.5688	27.1153	25.2967	27.7102	26.0246	26.9334	27.3714	26.7307	27.2171		Hspa8	-0.0189657	0.970296	1.01323	aging [GO:0007568]; ATP metabolic process [GO:0046034]; axo-dendritic transport [GO:0008088]; cellular response to cadmium ion [GO:0071276]; cellular response to heat [GO:0034605]; cellular response to unfolded protein [GO:0034620]; cerebellum development [GO:0021549]; chaperone cofactor-dependent protein refolding [GO:0051085]; chaperone-mediated autophagy [GO:0061684]; chaperone-mediated autoph…	asymmetric synapse [GO:0032279]; autophagosome [GO:0005776]; axon [GO:0030424]; cell surface [GO:0009986]; chaperone complex [GO:0101031]; cytoplasm [GO:0005737]; cytosol [GO:0005829]; dendrite [GO:0030425]; dendritic shaft [GO:0043198]; dendritic spine [GO:0043197]; extracellular exosome [GO:0070062]; glutamatergic synapse [GO:0098978]; glycinergic synapse [GO:0098690]; intermediate filament [GO…
P04797	Gapdh	26.284	25.6793	25.3598	26.0398	26.0155	25.3646	25.4497	25.4374	26.7948	26.2718		Gapdh	-0.0120504	0.971606	1.00839	antimicrobial humoral immune response mediated by antimicrobial peptide [GO:0061844]; apoptotic process [GO:0006915]; cAMP-mediated signaling [GO:0019933]; carbohydrate metabolic process [GO:0005975]; cellular response to interferon-gamma [GO:0071346]; defense response to fungus [GO:0050832]; female pregnancy [GO:0007565]; gluconeogenesis [GO:0006094]; glycolytic process [GO:0006096]; killing by …	cytoplasm [GO:0005737]; cytosol [GO:0005829]; GAIT complex [GO:0097452]; glutamatergic synapse [GO:0098978]; lipid droplet [GO:0005811]; microtubule cytoskeleton [GO:0015630]; nucleus [GO:0005634]; plasma membrane [GO:0005886]; postsynaptic density, intracellular component [GO:0099092]; ribonucleoprotein complex [GO:1990904]
P97574	Stc1	24.6877	24.675	24.7774	24.3127	25.097	24.7438	24.5295	24.3151	25.1958	24.7822		Stc1	0.00330922	0.986738	1.0023	bone development [GO:0060348]; cellular calcium ion homeostasis [GO:0006874]; cellular response to cAMP [GO:0071320]; cellular response to glucocorticoid stimulus [GO:0071385]; cellular response to hypoxia [GO:0071456]; chondrocyte proliferation [GO:0035988]; decidualization [GO:0046697]; embryo implantation [GO:0007566]; endothelial cell morphogenesis [GO:0001886]; growth plate cartilage axis sp…	apical plasma membrane [GO:0016324]; cytoplasm [GO:0005737]; extracellular space [GO:0005615]; nucleus [GO:0005634]
O55006	O55006	26.579	26.342	25.8901	26.3614	25.7147	26.8713	26.0676	26.0173	26.1883	25.7404		O55006	-0.000475761	0.998516	1.00033	bone remodeling [GO:0046849]	extracellular region [GO:0005576]

## Sheet: Cont2 vs. Cont1
		Cont1	cont1	cont1	cont1	cont1	Cont2	cont2	cont2	cont2	cont2								Proteins detected in previous studies
Protein IDs	Gene names	LFQ intensity G1C1	LFQ intensity G2C1	LFQ intensity G3C1	LFQ intensity G4C1	LFQ intensity G5C1	LFQ intensity G1C3	LFQ intensity G2C3	LFQ intensity G3C3	LFQ intensity G4C3	LFQ intensity G5C3	Legend	Gene name	log2(Cont2 vs. Cont1)	p-value	Fold change	Gene ontology (biological process)	Gene ontology (cellular component)	Swensen et al., 2021 doi: 10.3389/fmed.2021.548212	Davalieva et al., 2017 doi:10.3390/proteomes6010001	Lima et al., 2022 doi: 10.3390/cancers14082001
P27590	Umod	31.221	34.1609	33.3574	33.4317	32.0673	30.8837	30.6969	30.4452	30.1689	30.5797	Purple: proteins significantly downregulated in PCa1 vs. Cont1 (p<0.05)	Umod	-2.29278	0.00286889	4.89999	apoptotic process [GO:0006915]; apoptotic signaling pathway [GO:0097190]; autophagy [GO:0006914]; calcium ion homeostasis [GO:0055074]; cellular calcium ion homeostasis [GO:0006874]; cellular chloride ion homeostasis [GO:0030644]; cellular phosphate ion homeostasis [GO:0030643]; cellular response to unfolded protein [GO:0034620]; cellular sodium ion homeostasis [GO:0006883]; chaperone-mediated pr…	anchored component of membrane [GO:0031225]; apical part of cell [GO:0045177]; apical plasma membrane [GO:0016324]; basolateral plasma membrane [GO:0016323]; cell surface [GO:0009986]; ciliary membrane [GO:0060170]; cilium [GO:0005929]; cytoplasmic vesicle [GO:0031410]; endoplasmic reticulum [GO:0005783]; extracellular space [GO:0005615]; Golgi apparatus [GO:0005794]; membrane raft [GO:0045121]; …
P07647	Klk9	31.2839	31.1774	31.7887	31.1573	31.5667	30.1918	28.382	29.4142	31.0412	29.577	Green: proteins significantly upregulated in PCa1 vs. Cont1 (p<0.05)	Klk9	-1.67356	0.00636598	3.19	positive regulation of vasoconstriction [GO:0045907]; regulation of systemic arterial blood pressure [GO:0003073]; zymogen activation [GO:0031638]	secretory granule [GO:0030141]	+		+
P07861	Mme	28.2743	28.5365	28.4313	28.2065	28.5149	26.614	25.8296	26.3368	27.5834	27.2829	Blue: proteins whose abundance is not statistically signficant between PCa1 and Cont1 (p>0.05)	Mme	-1.66336	0.000890541	3.16754	aging [GO:0007568]; amyloid-beta clearance [GO:0097242]; amyloid-beta clearance by cellular catabolic process [GO:0150094]; amyloid-beta metabolic process [GO:0050435]; cellular response to cytokine stimulus [GO:0071345]; cellular response to UV-A [GO:0071492]; cellular response to UV-B [GO:0071493]; creatinine metabolic process [GO:0046449]; kidney development [GO:0001822]; learning or memory [G…	axon [GO:0030424]; brush border [GO:0005903]; cytoplasm [GO:0005737]; cytoplasmic vesicle [GO:0031410]; dendrite [GO:0030425]; early endosome [GO:0005769]; integral component of membrane [GO:0016021]; membrane [GO:0016020]; membrane raft [GO:0045121]; neuronal cell body [GO:0043025]; neuron projection terminus [GO:0044306]; plasma membrane [GO:0005886]; presynapse [GO:0098793]; synapse [GO:004520…	+
Q6IRK9	Cpq	30.2829	29.7122	29.4971	29.9771	29.8477	29.2304	29.1631	29.6155	28.2353	29.5596		Cpq	-0.702644	0.0366513	1.62748	peptide catabolic process [GO:0043171]; proteolysis [GO:0006508]; thyroid hormone generation [GO:0006590]; tissue regeneration [GO:0042246]	cytoplasm [GO:0005737]; endoplasmic reticulum [GO:0005783]; extracellular space [GO:0005615]; Golgi apparatus [GO:0005794]; lysosome [GO:0005764]	+
P50123	Enpep	28.2422	28.434	28.3627	28.5145	27.818	27.6157	27.6625	27.8796	26.9111	28.1035		Enpep	-0.63978	0.0261588	1.55809	angiogenesis [GO:0001525]; cell migration [GO:0016477]; cell population proliferation [GO:0008283]; glomerulus development [GO:0032835]; peptide catabolic process [GO:0043171]; proteolysis [GO:0006508]; regulation of blood pressure [GO:0008217]; regulation of systemic arterial blood pressure by renin-angiotensin [GO:0003081]; signal transduction [GO:0007165]	apical part of cell [GO:0045177]; apical plasma membrane [GO:0016324]; brush border [GO:0005903]; brush border membrane [GO:0031526]; cytoplasm [GO:0005737]; cytoplasmic vesicle [GO:0031410]; external side of plasma membrane [GO:0009897]; integral component of membrane [GO:0016021]; plasma membrane [GO:0005886]	+
P04916	Rbp4	26.3988	25.905	25.7626	26.0145	26.1318	25.9438	25.4484	25.4227	25.4352	25.3415		Rbp4	-0.524215	0.00891091	1.43815	cardiac muscle tissue development [GO:0048738]; detection of light stimulus involved in visual perception [GO:0050908]; embryonic organ morphogenesis [GO:0048562]; embryonic retina morphogenesis in camera-type eye [GO:0060059]; embryonic skeletal system development [GO:0048706]; eye development [GO:0001654]; female genitalia morphogenesis [GO:0048807]; gluconeogenesis [GO:0006094]; glucose homeos…	extracellular space [GO:0005615]; protein-containing complex [GO:0032991]			+
Q9R0T4	Cdh1	30.8884	30.7606	30.9455	31.0368	31.0292	31.0755	31.3507	31.2058	31.1558	31.2785		Cdh1	0.281162	0.00379381	1.21517	actin cytoskeleton reorganization [GO:0031532]; adherens junction organization [GO:0034332]; bicellular tight junction assembly [GO:0070830]; calcium-dependent cell-cell adhesion via plasma membrane cell adhesion molecules [GO:0016339]; cell-cell adhesion [GO:0098609]; cell-cell adhesion mediated by cadherin [GO:0044331]; cell-cell adhesion via plasma-membrane adhesion molecules [GO:0098742]; cel…	actin cytoskeleton [GO:0015629]; adherens junction [GO:0005912]; apical junction complex [GO:0043296]; apical part of cell [GO:0045177]; axon [GO:0030424]; axon terminus [GO:0043679]; basolateral plasma membrane [GO:0016323]; catenin complex [GO:0016342]; cell-cell junction [GO:0005911]; cell junction [GO:0030054]; cell periphery [GO:0071944]; cell surface [GO:0009986]; cortical actin cytoskeleto…	+	+
P47967	Lgals5	26.2265	25.6134	25.4458	25.566	25.43	26.0829	26.3272	26.3818	26.2076	25.7635		Lgals5	0.496259	0.0268506	1.41055	negative regulation of CD4-positive, alpha-beta T cell proliferation [GO:2000562]; negative regulation of interferon-gamma production [GO:0032689]; positive regulation of gene expression [GO:0010628]; positive regulation of T cell apoptotic process [GO:0070234]	cytosol [GO:0005829]; nucleus [GO:0005634]
Q6P734	Serping1	24.6641	24.8169	24.3629	24.5072	24.1132	24.758	25.612	24.9851	25.6517	24.6432		Serping1	0.637139	0.0313695	1.55524	aging [GO:0007568]; blood coagulation [GO:0007596]; complement activation, classical pathway [GO:0006958]; fibrinolysis [GO:0042730]; innate immune response [GO:0045087]; negative regulation of complement activation, lectin pathway [GO:0001869]; negative regulation of endopeptidase activity [GO:0010951]	extracellular space [GO:0005615]			+
P31211	Serpina6	27.2052	27.833	27.1	26.5007	26.8105	27.5171	27.8569	27.545	28.6915	27.9772		Serpina6	0.827642	0.0275862	1.77478	glucocorticoid metabolic process [GO:0008211]; negative regulation of endopeptidase activity [GO:0010951]	extracellular space [GO:0005615]	+
P05371	Clu	26.7405	26.5433	26.4667	26.6195	26.4098	26.8564	27.5913	26.7256	29.0662	27.5272		Clu	0.997398	0.0449452	1.9964	aging [GO:0007568]; cell morphogenesis [GO:0000902]; cellular response to growth factor stimulus [GO:0071363]; central nervous system myelin maintenance [GO:0032286]; chaperone-mediated protein complex assembly [GO:0051131]; chaperone-mediated protein folding [GO:0061077]; endocrine pancreas development [GO:0031018]; estrous cycle [GO:0044849]; immune complex clearance [GO:0002434]; intrinsic apo…	aggresome [GO:0016235]; apical dendrite [GO:0097440]; cell surface [GO:0009986]; chromaffin granule [GO:0042583]; cytoplasm [GO:0005737]; cytosol [GO:0005829]; extracellular space [GO:0005615]; growth cone [GO:0030426]; intracellular membrane-bounded organelle [GO:0043231]; mitochondrial inner membrane [GO:0005743]; mitochondrion [GO:0005739]; neurofibrillary tangle [GO:0097418]; neuron projectio…	+	+	+
P56574	Idh2	24.7907	24.685	23.6042	24.1407	24.2399	25.9	24.6882	25.2862	25.2936	25.5451		Idh2	1.05052	0.00681396	2.07128	2-oxoglutarate metabolic process [GO:0006103]; glyoxylate cycle [GO:0006097]; isocitrate metabolic process [GO:0006102]; NADP biosynthetic process [GO:0006741]; NADP metabolic process [GO:0006739]; negative regulation of glial cell migration [GO:1903976]; negative regulation of glial cell proliferation [GO:0060253]; negative regulation of matrix metallopeptidase secretion [GO:1904465]; tricarboxy…	cytosol [GO:0005829]; mitochondrion [GO:0005739]; peroxisome [GO:0005777]
Q6LED0	Q6LED0	25.9203	25.4963	25.7265	25.5029	26.5517	27.3659	25.9939	27.8663	26.8693	27.3262		Q6LED0	1.24479	0.00990594	2.36984		nucleoplasm [GO:0005654]; nucleosome [GO:0000786]
P02761	P02761	36.7974	36.9061	36.3942	36.0822	37.1573	36.3901	35.6138	36.3652	34.65	36.1061		P02761	-0.842412	0.0560318	1.79305	aerobic respiration [GO:0009060]; cellular response to lipid [GO:0071396]; energy reserve metabolic process [GO:0006112]; glucose homeostasis [GO:0042593]; heat generation [GO:0031649]; locomotor rhythm [GO:0045475]; mitochondrion morphogenesis [GO:0070584]; negative regulation of gluconeogenesis [GO:0045721]; negative regulation of insulin secretion involved in cellular response to glucose stimu…	cytosol [GO:0005829]; extracellular space [GO:0005615]; nucleus [GO:0005634]
P02650	Apoe	28.1972	28.0265	28.1927	28.3917	28.7372	28.108	29.1527	28.8123	28.8548	29.0539		Apoe	0.487296	0.0575026	1.40182	aging [GO:0007568]; AMPA glutamate receptor clustering [GO:0097113]; amyloid precursor protein metabolic process [GO:0042982]; artery morphogenesis [GO:0048844]; cellular calcium ion homeostasis [GO:0006874]; cellular response to cholesterol [GO:0071397]; cellular response to ethanol [GO:0071361]; cellular response to growth factor stimulus [GO:0071363]; cellular response to interleukin-1 [GO:007…	cell surface [GO:0009986]; chylomicron [GO:0042627]; cytoplasm [GO:0005737]; dendrite [GO:0030425]; discoidal high-density lipoprotein particle [GO:0034365]; endoplasmic reticulum [GO:0005783]; endosome [GO:0005768]; extracellular matrix [GO:0031012]; extracellular region [GO:0005576]; extracellular space [GO:0005615]; extrinsic component of external side of plasma membrane [GO:0031232]; glutamat…
Q00657	Cspg4	28.568	28.0921	27.7846	28.4326	28.168	27.9842	28.0001	27.8387	27.0607	27.8676		Cspg4	-0.458776	0.0729547	1.37438	angiogenesis [GO:0001525]; cell population proliferation [GO:0008283]; glial cell migration [GO:0008347]; inflammatory response [GO:0006954]; intracellular signal transduction [GO:0035556]; negative regulation of neuron projection development [GO:0010977]; neuron remodeling [GO:0016322]; platelet-derived growth factor receptor signaling pathway [GO:0048008]; positive regulation of MAPK cascade [G…	apical plasma membrane [GO:0016324]; cell projection [GO:0042995]; cell surface [GO:0009986]; integral component of plasma membrane [GO:0005887]; lamellipodium membrane [GO:0031258]; plasma membrane [GO:0005886]; ruffle [GO:0001726]
Q64240	Ambp	30.3592	30.6788	30.5831	30.8183	30.2645	30.2992	29.9097	30.5581	28.8524	30.0397		Ambp	-0.608956	0.0843868	1.52516	cellular oxidant detoxification [GO:0098869]; cellular response to reactive oxygen species [GO:0034614]; cytochrome c metabolic process [GO:1903606]; hemoglobin metabolic process [GO:0020027]; protein catabolic process [GO:0030163]; protein-chromophore linkage [GO:0018298]	cell surface [GO:0009986]; extracellular space [GO:0005615]; extrinsic component of mitochondrial inner membrane [GO:0031314]; intracellular membrane-bounded organelle [GO:0043231]; plasma membrane [GO:0005886]
P98158	Lrp2	30.348	30.3605	30.0022	30.5456	30.0878	30.1173	30.0376	30.0189	29.2506	30.0893		Lrp2	-0.366088	0.0922043	1.28885	aging [GO:0007568]; amyloid-beta clearance [GO:0097242]; animal organ regeneration [GO:0031100]; aorta development [GO:0035904]; cell population proliferation [GO:0008283]; cellular response to growth factor stimulus [GO:0071363]; chemoattraction of axon [GO:0061642]; coronary artery morphogenesis [GO:0060982]; coronary vasculature development [GO:0060976]; endocytic hemoglobin import into cell […	apical part of cell [GO:0045177]; apical plasma membrane [GO:0016324]; axon [GO:0030424]; axonal growth cone [GO:0044295]; brush border [GO:0005903]; brush border membrane [GO:0031526]; cell surface [GO:0009986]; clathrin-coated pit [GO:0005905]; cytoplasm [GO:0005737]; dendrite [GO:0030425]; endocytic vesicle [GO:0030139]; endoplasmic reticulum [GO:0005783]; endosome [GO:0005768]; endosome lumen…
P02770	Alb	35.1943	35.7354	35.93	35.0418	35.3505	35.8565	35.8755	35.7782	35.6057	35.7725		Alb	0.327256	0.0953091	1.25463	cellular response to starvation [GO:0009267]; maintenance of mitochondrion location [GO:0051659]; negative regulation of apoptotic process [GO:0043066]; positive regulation of circadian sleep/wake cycle, non-REM sleep [GO:0046010]; response to mercury ion [GO:0046689]; response to nutrient [GO:0007584]; response to organic substance [GO:0010033]; response to platinum ion [GO:0070541]; vasodilatio…	basement membrane [GO:0005604]; cytoplasm [GO:0005737]; extracellular exosome [GO:0070062]; extracellular region [GO:0005576]; extracellular space [GO:0005615]; protein-containing complex [GO:0032991]
P20761	Igh-1a	25.127	26.1616	26.266	25.231	25.7116	26.0483	27.7096	26.0464	25.7469	27.0349		Igh-1a	0.817766	0.0977284	1.76267	B cell receptor signaling pathway [GO:0050853]; complement activation, classical pathway [GO:0006958]; defense response to bacterium [GO:0042742]; innate immune response [GO:0045087]; phagocytosis, engulfment [GO:0006911]; phagocytosis, recognition [GO:0006910]; positive regulation of B cell activation [GO:0050871]	external side of plasma membrane [GO:0009897]; immunoglobulin complex, circulating [GO:0042571]
P17475	Serpina1	30.9539	31.1754	31.3836	30.0021	30.8313	30.9577	31.2667	31.1963	31.8174	31.8224		Serpina1	0.542854	0.101771	1.45685	acute-phase response [GO:0006953]; inflammatory response [GO:0006954]; negative regulation of endopeptidase activity [GO:0010951]; negative regulation of serine-type endopeptidase activity [GO:1900004]; response to chromate [GO:0046687]; response to cytokine [GO:0034097]; response to estradiol [GO:0032355]; response to hypoxia [GO:0001666]; response to inorganic substance [GO:0010035]; response t…	endoplasmic reticulum [GO:0005783]; extracellular space [GO:0005615]; Golgi apparatus [GO:0005794]
Q5U2Q3	Q5U2Q3	25.2884	25.7929	25.8499	26.0733	25.3239	25.8798	25.4802	26.5031	26.5985	26.0714		Q5U2Q3	0.440909	0.124411	1.35746		nuclear body [GO:0016604]; nucleus [GO:0005634]
P02764	Orm1	28.6215	28.9877	29.175	28.3179	28.9731	28.7859	29.2099	28.9367	29.6302	29.3111		Orm1	0.359709	0.129102	1.28317	acute inflammatory response to antigenic stimulus [GO:0002438]; acute-phase response [GO:0006953]; animal organ regeneration [GO:0031100]; cellular response to glucocorticoid stimulus [GO:0071385]; cellular response to growth hormone stimulus [GO:0071378]; cellular response to retinoic acid [GO:0071300]; chronic inflammatory response to antigenic stimulus [GO:0002439]; negative regulation of inte…	extracellular space [GO:0005615]
P31977	Ezr	27.1913	29.2314	28.6039	29.3396	28.3669	27.7407	27.9228	28.3408	26.4895	28.0562		Ezr	-0.836646	0.133604	1.78589	actin cytoskeleton reorganization [GO:0031532]; actin filament bundle assembly [GO:0051017]; astral microtubule organization [GO:0030953]; cellular response to cAMP [GO:0071320]; cortical microtubule organization [GO:0043622]; epithelial cell differentiation [GO:0030855]; establishment of centrosome localization [GO:0051660]; establishment of endothelial barrier [GO:0061028]; establishment or mai…	actin cytoskeleton [GO:0015629]; actin filament [GO:0005884]; adherens junction [GO:0005912]; apical part of cell [GO:0045177]; apical plasma membrane [GO:0016324]; astrocyte projection [GO:0097449]; basolateral plasma membrane [GO:0016323]; brush border [GO:0005903]; cell body [GO:0044297]; cell cortex [GO:0005938]; cell periphery [GO:0071944]; cell projection [GO:0042995]; cell tip [GO:0051286]…
P22057	Ptgds	29.4012	29.3926	29.3537	29.4356	29.6836	29.6901	29.294	30.1741	29.4996	30.063		Ptgds	0.290835	0.137614	1.22335	mast cell degranulation [GO:0043303]; negative regulation of male germ cell proliferation [GO:2000255]; prostaglandin biosynthetic process [GO:0001516]; regulation of circadian sleep/wake cycle, sleep [GO:0045187]; response to glucocorticoid [GO:0051384]	extracellular region [GO:0005576]; extracellular space [GO:0005615]; Golgi apparatus [GO:0005794]; nuclear envelope [GO:0005635]; nuclear membrane [GO:0031965]; perinuclear region of cytoplasm [GO:0048471]; rough endoplasmic reticulum [GO:0005791]
P14046	A1i3	30.7038	31.1561	31.1333	30.2803	30.7169	31.1717	32.3362	30.8909	30.7442	31.4999		A1i3	0.530504	0.142396	1.44443		extracellular space [GO:0005615]
O35217	Minpp1	25.9774	25.5756	25.308	25.5175	25.8746	26.1285	26.6488	25.7422	25.5838	25.9328		Minpp1	0.356579	0.145735	1.28039	phosphatidylinositol-mediated signaling [GO:0048015]	endoplasmic reticulum lumen [GO:0005788]
P00758	Ngfg	31.3501	30.9318	31.7763	32.0569	30.5072	32.2711	31.9725	32.6888	30.8846	32.0813		Ngfg	0.655206	0.148623	1.57484	regulation of systemic arterial blood pressure [GO:0003073]; zymogen activation [GO:0031638]	secretory granule [GO:0030141]
P30152	Lcn2	26.2889	26.0524	26.3898	25.5261	27.2081	26.7546	26.7565	27.4333	26.006	27.8726		Lcn2	0.671537	0.149285	1.59277	acute-phase response [GO:0006953]; cellular response to amyloid-beta [GO:1904646]; cellular response to hydrogen peroxide [GO:0070301]; cellular response to increased oxygen levels [GO:0036295]; cellular response to interleukin-1 [GO:0071347]; cellular response to interleukin-6 [GO:0071354]; cellular response to lipopolysaccharide [GO:0071222]; cellular response to nerve growth factor stimulus [G…	cytoplasm [GO:0005737]; cytoplasmic vesicle lumen [GO:0060205]; cytosol [GO:0005829]; extracellular region [GO:0005576]; extracellular space [GO:0005615]
Q9EPB1	Dpp7	29.5408	28.8326	28.521	28.5443	29.0763	28.2395	28.6461	28.8432	28.0689	28.792		Dpp7	-0.385057	0.153528	1.30591	lysosomal protein catabolic process [GO:1905146]; protein catabolic process [GO:0030163]; proteolysis [GO:0006508]	cytoplasmic vesicle [GO:0031410]; cytosol [GO:0005829]; extracellular region [GO:0005576]; lysosome [GO:0005764]; vesicle [GO:0031982]
P13635	Cp	28.0842	28.5193	28.9938	27.974	28.6479	28.4676	29.2154	28.1432	29.7822	29.4127		Cp	0.560404	0.154897	1.47468	aging [GO:0007568]; cellular iron ion homeostasis [GO:0006879]; female pregnancy [GO:0007565]; iron ion homeostasis [GO:0055072]; iron ion transport [GO:0006826]; lactation [GO:0007595]; liver development [GO:0001889]; lung development [GO:0030324]; mammary gland involution [GO:0060056]; plasma membrane copper ion transport [GO:0015679]; response to copper ion [GO:0046688]; response to nutrient […	anchored component of plasma membrane [GO:0046658]; extracellular space [GO:0005615]; plasma membrane [GO:0005886]
P15399-2	Pbsn	33.2921	29.7189	29.9514	30.3875	33.604	27.848	28.2293	27.3667	34.4848	25.8465		Pbsn	-2.63575	0.162495	6.21497		extracellular space [GO:0005615]; nucleus [GO:0005634]
P32038	Cfd	26.405	26.7252	27.0945	26.57	25.797	26.8704	26.4317	27.411	27.8065	26.6206		Cfd	0.50971	0.163706	1.42376	complement activation, alternative pathway [GO:0006957]; Notch signaling pathway [GO:0007219]; response to bacterium [GO:0009617]; retina development in camera-type eye [GO:0060041]; vascular associated smooth muscle cell differentiation [GO:0035886]	extracellular space [GO:0005615]
P19112	Fbp1	26.2976	26.4573	26.3184	28.0948	26.3706	26.9077	25.7879	26.3954	25.3949	25.8507		Fbp1	-0.640434	0.180523	1.5588	carbohydrate metabolic process [GO:0005975]; cellular response to insulin stimulus [GO:0032869]; cellular response to magnesium ion [GO:0071286]; cellular response to xenobiotic stimulus [GO:0071466]; dephosphorylation [GO:0016311]; fructose 1,6-bisphosphate metabolic process [GO:0030388]; fructose 6-phosphate metabolic process [GO:0006002]; fructose metabolic process [GO:0006000]; gluconeogenesi…	cytoplasm [GO:0005737]; cytosol [GO:0005829]; nucleus [GO:0005634]
P06866	Hp	25.9451	26.8134	27.6339	27.1559	27.6683	26.7858	28.0765	27.2099	27.9442	28.3271		Hp	0.625423	0.182771	1.54266	acute inflammatory response [GO:0002526]; acute-phase response [GO:0006953]; aging [GO:0007568]; animal organ regeneration [GO:0031100]; defense response to bacterium [GO:0042742]; immune system process [GO:0002376]; liver development [GO:0001889]; negative regulation of hydrogen peroxide catabolic process [GO:2000296]; negative regulation of oxidoreductase activity [GO:0051354]; Notch signaling …	blood microparticle [GO:0072562]; endoplasmic reticulum [GO:0005783]; extracellular space [GO:0005615]; Golgi apparatus [GO:0005794]; haptoglobin-hemoglobin complex [GO:0031838]
P04276	Gc	27.6337	28.0317	27.9256	27.8285	27.8663	27.1976	28.0915	27.5914	27.4885	27.7698		Gc	-0.229416	0.195272	1.17236	female pregnancy [GO:0007565]; lactation [GO:0007595]; response to estradiol [GO:0032355]; response to nutrient levels [GO:0031667]; response to steroid hormone [GO:0048545]; vitamin D metabolic process [GO:0042359]	axon [GO:0030424]; cytoplasm [GO:0005737]; cytosol [GO:0005829]; extracellular space [GO:0005615]; perinuclear region of cytoplasm [GO:0048471]
P08649	C4	26.3387	25.861	26.3789	26.9944	26.1602	25.68	26.8906	25.3601	25.0753	26.1685		C4	-0.511718	0.204444	1.42575	complement activation [GO:0006956]; complement activation, classical pathway [GO:0006958]; inflammatory response [GO:0006954]; innate immune response [GO:0045087]; positive regulation of apoptotic cell clearance [GO:2000427]	axon [GO:0030424]; dendrite [GO:0030425]; extracellular region [GO:0005576]; extracellular space [GO:0005615]; neuronal cell body [GO:0043025]; synapse [GO:0045202]
Q03626	Mug1	27.6223	26.48	27.8759	27.3348	27.3122	27.381	29.3904	27.5345	27.2096	28.0845		Mug1	0.595002	0.232297	1.51047	acute-phase response [GO:0006953]; embryo implantation [GO:0007566]; inflammatory response [GO:0006954]	extracellular space [GO:0005615]
P02680-2	Fgg	22.5438	21.4239	22.8622	22.4808	21.1662	22.6346	29.0706	22.4959	21.5681	23.5373		Fgg	1.76591	0.236721	3.40088	blood coagulation, fibrin clot formation [GO:0072378]; cell-matrix adhesion [GO:0007160]; cellular response to interleukin-1 [GO:0071347]; cellular response to interleukin-6 [GO:0071354]; fibrinolysis [GO:0042730]; negative regulation of endothelial cell apoptotic process [GO:2000352]; negative regulation of extrinsic apoptotic signaling pathway via death domain receptors [GO:1902042]; negative r…	blood microparticle [GO:0072562]; cell cortex [GO:0005938]; cell surface [GO:0009986]; collagen-containing extracellular matrix [GO:0062023]; cytoplasm [GO:0005737]; external side of plasma membrane [GO:0009897]; extracellular space [GO:0005615]; fibrinogen complex [GO:0005577]; platelet alpha granule [GO:0031091]; synapse [GO:0045202]
P20760	Igg-2a	30.0571	30.8869	30.9818	29.8621	30.8169	30.7954	31.6226	31.5109	29.7871	31.5362		Igg-2a	0.529464	0.242441	1.44339	B cell receptor signaling pathway [GO:0050853]; complement activation, classical pathway [GO:0006958]; defense response to bacterium [GO:0042742]; innate immune response [GO:0045087]; phagocytosis, engulfment [GO:0006911]; phagocytosis, recognition [GO:0006910]; positive regulation of B cell activation [GO:0050871]	external side of plasma membrane [GO:0009897]; immunoglobulin complex, circulating [GO:0042571]
Q4QQW8	Plbd2	24.6341	24.63	23.882	24.2691	24.3175	24.0513	24.8096	24.4038	24.7647	25.2209		Plbd2	0.303511	0.244812	1.23414	phospholipid catabolic process [GO:0009395]	extracellular region [GO:0005576]; lysosomal lumen [GO:0043202]; lysosome [GO:0005764]
P62986	Uba52;Rps27a;Ubb;Ubc	27.3793	27.2632	26.9657	27.242	27.3051	27.263	26.8803	27.7507	27.8584	27.5356		Uba52;Rps27a;Ubb;Ubc	0.22654	0.267561	1.17003	modification-dependent protein catabolic process [GO:0019941]; protein ubiquitination [GO:0016567]; response to insecticide [GO:0017085]; translation [GO:0006412]	cytoplasm [GO:0005737]; cytosolic large ribosomal subunit [GO:0022625]; cytosolic ribosome [GO:0022626]; cytosolic small ribosomal subunit [GO:0022627]; nucleus [GO:0005634]; synapse [GO:0045202]
P20059	Hpx	30.9408	31.0939	30.8884	30.2744	30.1241	30.8466	31.3288	30.5951	30.9969	30.8725		Hpx	0.263648	0.281167	1.20051	cellular iron ion homeostasis [GO:0006879]; heme metabolic process [GO:0042168]; hemoglobin metabolic process [GO:0020027]; positive regulation of humoral immune response mediated by circulating immunoglobulin [GO:0002925]; positive regulation of immunoglobulin production [GO:0002639]; positive regulation of interferon-gamma-mediated signaling pathway [GO:0060335]; positive regulation of response…	extracellular space [GO:0005615]
Q9QX79	Fetub	27.0607	27.2042	27.4499	27.0341	26.799	27.0513	27.8388	27.3313	26.8072	27.8547		Fetub	0.267071	0.288466	1.20336	binding of sperm to zona pellucida [GO:0007339]; negative regulation of endopeptidase activity [GO:0010951]; single fertilization [GO:0007338]	extracellular region [GO:0005576]; extracellular space [GO:0005615]
P36373	Klk7	30.5472	31.1255	30.4418	30.6589	30.2647	30.3343	30.73	30.717	28.1029	30.2515		Klk7	-0.580493	0.289449	1.49536	positive regulation of antibacterial peptide production [GO:0002803]; regulation of systemic arterial blood pressure [GO:0003073]; zymogen activation [GO:0031638]	cornified envelope [GO:0001533]; epidermal lamellar body [GO:0097209]; extracellular space [GO:0005615]; secretory granule [GO:0030141]
P04937-4	Fn1	28.302	27.5853	27.4481	28.0086	27.6053	27.3509	28.4272	27.4155	26.6384	27.2737		Fn1	-0.368731	0.293832	1.29122	acute-phase response [GO:0006953]; angiogenesis [GO:0001525]; biological process involved in interaction with symbiont [GO:0051702]; blood coagulation, fibrin clot formation [GO:0072378]; calcium-independent cell-matrix adhesion [GO:0007161]; cell activation [GO:0001775]; cell adhesion [GO:0007155]; cell-matrix adhesion [GO:0007160]; cell-substrate junction assembly [GO:0007044]; cellular respons…	apical plasma membrane [GO:0016324]; basement membrane [GO:0005604]; collagen-containing extracellular matrix [GO:0062023]; endoplasmic reticulum-Golgi intermediate compartment [GO:0005793]; extracellular exosome [GO:0070062]; extracellular matrix [GO:0031012]; extracellular space [GO:0005615]; fibrinogen complex [GO:0005577]
Q68FP1-2	Gsn	29.6248	29.8363	29.7274	29.6263	29.6748	29.0791	29.1555	29.3336	30.1533	29.6678		Gsn	-0.220061	0.305174	1.16478	actin cytoskeleton organization [GO:0030036]; actin filament capping [GO:0051693]; actin filament depolymerization [GO:0030042]; actin filament polymerization [GO:0030041]; actin filament reorganization [GO:0090527]; actin filament severing [GO:0051014]; actin nucleation [GO:0045010]; actin polymerization or depolymerization [GO:0008154]; aging [GO:0007568]; amyloid fibril formation [GO:1990000];…	actin cap [GO:0030478]; actin cytoskeleton [GO:0015629]; cortical actin cytoskeleton [GO:0030864]; cytoplasm [GO:0005737]; cytosol [GO:0005829]; extracellular region [GO:0005576]; extracellular space [GO:0005615]; lamellipodium [GO:0030027]; myelin sheath [GO:0043209]; perinuclear region of cytoplasm [GO:0048471]; phagocytic vesicle [GO:0045335]; plasma membrane [GO:0005886]; podosome [GO:0002102…
Q63556	Serpina3m	25.0091	26.3482	25.9076	25.0975	25.452	25.3575	25.9896	25.7649	26.1433	26.145		Serpina3m	0.317212	0.309463	1.24592	negative regulation of endopeptidase activity [GO:0010951]	extracellular space [GO:0005615]
P07314	Ggt1	29.4711	29.1957	29.5222	29.3958	29.2896	29.1476	29.3635	29.5367	29.714	29.8403		Ggt1	0.145541	0.318564	1.10615	aging [GO:0007568]; cellular amino acid metabolic process [GO:0006520]; cellular response to oxidative stress [GO:0034599]; cysteine biosynthetic process [GO:0019344]; fatty acid metabolic process [GO:0006631]; glutamate metabolic process [GO:0006536]; glutathione biosynthetic process [GO:0006750]; glutathione catabolic process [GO:0006751]; hepatoblast differentiation [GO:0061017]; hepatocyte di…	extracellular space [GO:0005615]; integral component of plasma membrane [GO:0005887]; plasma membrane [GO:0005886]; vesicle [GO:0031982]
P14841	Cst3	29.4225	29.9756	29.3107	29.2937	29.7426	29.6084	28.9876	29.8433	25.6514	29.5065		Cst3	-0.829594	0.32495	1.77719	apoptotic process [GO:0006915]; brain development [GO:0007420]; cell activation [GO:0001775]; cellular response to hydrogen peroxide [GO:0070301]; cellular response to oxidative stress [GO:0034599]; circadian sleep/wake cycle, REM sleep [GO:0042747]; defense response [GO:0006952]; embryo implantation [GO:0007566]; eye development [GO:0001654]; male gonad development [GO:0008584]; negative regulat…	axon [GO:0030424]; basement membrane [GO:0005604]; cell projection [GO:0042995]; contractile fiber [GO:0043292]; cytoplasm [GO:0005737]; endoplasmic reticulum [GO:0005783]; extracellular region [GO:0005576]; extracellular space [GO:0005615]; Golgi apparatus [GO:0005794]; lysosome [GO:0005764]; multivesicular body [GO:0005771]; neuronal cell body [GO:0043025]; nuclear membrane [GO:0031965]; perinu…
O70513	Lgals3bp	25.3336	25.0675	24.7702	25.0121	24.7139	25.3279	24.9698	24.8465	25.7079	25.0274		Lgals3bp	0.196455	0.33318	1.14588	cell adhesion [GO:0007155]	extracellular space [GO:0005615]; membrane [GO:0016020]
P02091	Hbb	27.8838	27.2309	29.3913	32.432	32.3062	28.6601	33.6838	26.2674	23.9024	27.1517		Hbb	-1.91574	0.357093	3.77308	cellular oxidant detoxification [GO:0098869]; erythrocyte development [GO:0048821]; glutathione metabolic process [GO:0006749]; hemopoiesis [GO:0030097]; hydrogen peroxide catabolic process [GO:0042744]; nitric oxide transport [GO:0030185]; oxygen transport [GO:0015671]; positive regulation of cell death [GO:0010942]; regulation of eIF2 alpha phosphorylation by heme [GO:0010999]; renal absorption…	extracellular space [GO:0005615]; haptoglobin-hemoglobin complex [GO:0031838]; hemoglobin complex [GO:0005833]
P52759	Hrsp12	26.5868	27.1594	26.3389	27.5353	26.9844	26.9068	26.5134	26.4871	27.2604	25.972		Hrsp12	-0.293009	0.361061	1.22519	brain development [GO:0007420]; G1 to G0 transition [GO:0070314]; kidney development [GO:0001822]; lipid metabolic process [GO:0006629]; lung development [GO:0030324]; mRNA catabolic process [GO:0006402]; mRNA destabilization [GO:0061157]; negative regulation of epithelial cell proliferation [GO:0050680]; negative regulation of translation [GO:0017148]; organonitrogen compound catabolic process […	cytoplasm [GO:0005737]; cytosol [GO:0005829]; mitochondrial matrix [GO:0005759]; mitochondrion [GO:0005739]; nucleus [GO:0005634]; peroxisome [GO:0005777]
P20767	P20767	29.0207	28.5463	29.7105	29.6384	29.9018	29.7451	29.0201	30.4285	29.5807	29.6677		P20767	0.324901	0.364165	1.25258	B cell receptor signaling pathway [GO:0050853]; complement activation, classical pathway [GO:0006958]; defense response to bacterium [GO:0042742]; innate immune response [GO:0045087]; phagocytosis, engulfment [GO:0006911]; phagocytosis, recognition [GO:0006910]; positive regulation of B cell activation [GO:0050871]	external side of plasma membrane [GO:0009897]; immunoglobulin complex, circulating [GO:0042571]
P48199	Crp	28.7129	29.2321	29.175	29.3458	29.5388	28.8967	29.3014	29.447	25.7962	29.3782		Crp	-0.637044	0.396912	1.55514	acute-phase response [GO:0006953]; aging [GO:0007568]; cellular response to calcium ion [GO:0071277]; cellular response to interleukin-6 [GO:0071354]; cellular response to nitric oxide [GO:0071732]; complement activation, classical pathway [GO:0006958]; innate immune response [GO:0045087]; negative regulation by host of viral process [GO:0044793]; negative regulation of lipid storage [GO:0010888]…	extracellular space [GO:0005615]; filopodium [GO:0030175]; growth cone [GO:0030426]
Q8CHN3	Wfdc2	26.5912	25.9029	26.1006	25.7484	25.1989	26.821	25.6999	26.2056	26.2731	25.8745		Wfdc2	0.266434	0.397394	1.20283	antibacterial humoral response [GO:0019731]; innate immune response [GO:0045087]	extracellular space [GO:0005615]
P08289	Alpl	23.1152	23.5599	22.8633	23.5899	23.8596	23.6676	22.8304	23.7127	24.2882	23.8006		Alpl	0.262323	0.400727	1.19941	biomineralization [GO:0110148]; bone mineralization [GO:0030282]; calcium ion homeostasis [GO:0055074]; cellular homeostasis [GO:0019725]; cellular response to organic cyclic compound [GO:0071407]; cementum mineralization [GO:0071529]; dephosphorylation [GO:0016311]; developmental process involved in reproduction [GO:0003006]; endochondral ossification [GO:0001958]; futile creatine cycle [GO:0140…	anchored component of membrane [GO:0031225]; extracellular matrix [GO:0031012]; extracellular membrane-bounded organelle [GO:0065010]; extracellular space [GO:0005615]; mitochondrial intermembrane space [GO:0005758]; mitochondrial membrane [GO:0031966]; plasma membrane [GO:0005886]
P27274	Cd59	28.7461	29.3531	28.564	28.5023	28.8784	28.7943	28.8958	29.0527	28.1319	28.0477		Cd59	-0.224311	0.40669	1.16822	negative regulation of activation of membrane attack complex [GO:0001971]; negative regulation of apoptotic process [GO:0043066]; negative regulation of complement activation [GO:0045916]; negative regulation of complement-dependent cytotoxicity [GO:1903660]; positive regulation of T cell proliferation [GO:0042102]; regulation of complement activation [GO:0030449]; regulation of complement-depend…	anchored component of external side of plasma membrane [GO:0031362]; cell surface [GO:0009986]; compact myelin [GO:0043218]; extracellular space [GO:0005615]; plasma membrane [GO:0005886]; sarcolemma [GO:0042383]
P12346	Tf	32.5563	33.0005	33.6804	32.2856	32.9483	32.9859	33.4892	32.7263	32.982	33.4901		Tf	0.240474	0.417271	1.18138	actin filament organization [GO:0007015]; acute-phase response [GO:0006953]; antibacterial humoral response [GO:0019731]; apoptotic process [GO:0006915]; cellular iron ion homeostasis [GO:0006879]; cellular response to cAMP [GO:0071320]; cellular response to follicle-stimulating hormone stimulus [GO:0071372]; cellular response to iron ion [GO:0071281]; ERK1 and ERK2 cascade [GO:0070371]; iron ion…	apical plasma membrane [GO:0016324]; basal part of cell [GO:0045178]; basal plasma membrane [GO:0009925]; basement membrane [GO:0005604]; cell surface [GO:0009986]; cell tip [GO:0051286]; clathrin-coated pit [GO:0005905]; cytoplasmic vesicle [GO:0031410]; early endosome [GO:0005769]; endocytic vesicle [GO:0030139]; endosome [GO:0005768]; extracellular region [GO:0005576]; extracellular space [GO:…
P15083	Pigr	28.6088	28.7927	27.9685	28.435	28.3187	28.7322	28.241	28.4283	26.4106	28.4357		Pigr	-0.375204	0.418506	1.29702	detection of chemical stimulus involved in sensory perception of bitter taste [GO:0001580]; epidermal growth factor receptor signaling pathway [GO:0007173]; Fc receptor signaling pathway [GO:0038093]; immunoglobulin transcytosis in epithelial cells mediated by polymeric immunoglobulin receptor [GO:0002415]; receptor clustering [GO:0043113]	extracellular space [GO:0005615]; integral component of membrane [GO:0016021]; plasma membrane [GO:0005886]; receptor complex [GO:0043235]; recycling endosome membrane [GO:0055038]; secretory IgA immunoglobulin complex [GO:0071751]; transport vesicle [GO:0030133]
P04764	Eno1	25.5002	27.3765	26.6756	27.811	26.4106	27.1189	26.4954	26.2208	26.3606	25.574		Eno1	-0.400829	0.419259	1.32027	canonical glycolysis [GO:0061621]; cellular response to hypoxia [GO:0071456]; cellular response to interleukin-7 [GO:0098761]; ERK1 and ERK2 cascade [GO:0070371]; glycolytic process [GO:0006096]; in utero embryonic development [GO:0001701]; negative regulation of cell growth [GO:0030308]; negative regulation of hypoxia-induced intrinsic apoptotic signaling pathway [GO:1903298]; negative regulatio…	cell cortex [GO:0005938]; cell surface [GO:0009986]; cytoplasm [GO:0005737]; cytosol [GO:0005829]; extrinsic component of plasma membrane [GO:0019897]; growth cone [GO:0030426]; membrane [GO:0016020]; membrane raft [GO:0045121]; neuron projection [GO:0043005]; nuclear outer membrane [GO:0005640]; phosphopyruvate hydratase complex [GO:0000015]; plasma membrane [GO:0005886]; synaptic membrane [GO:0…
P26644	Apoh	25.7447	24.4425	25.9478	25.9671	24.887	25.2364	26.7812	25.4183	25.5227	25.7822		Apoh	0.35036	0.420844	1.27488	aging [GO:0007568]; animal organ regeneration [GO:0031100]; blood coagulation [GO:0007596]; blood coagulation, intrinsic pathway [GO:0007597]; negative regulation of angiogenesis [GO:0016525]; negative regulation of blood coagulation [GO:0030195]; negative regulation of endothelial cell migration [GO:0010596]; negative regulation of endothelial cell proliferation [GO:0001937]; negative regulation…	cell surface [GO:0009986]; chylomicron [GO:0042627]; cytoplasm [GO:0005737]; extracellular space [GO:0005615]; high-density lipoprotein particle [GO:0034364]; plasma membrane [GO:0005886]; very-low-density lipoprotein particle [GO:0034361]
P24090	Ahsg	28.4935	28.7473	28.1411	28.8309	27.5823	28.2239	28.9738	28.4584	28.8387	28.4321		Ahsg	0.22639	0.421404	1.1699	acute-phase response [GO:0006953]; animal organ regeneration [GO:0031100]; cellular response to insulin stimulus [GO:0032869]; cerebral cortex development [GO:0021987]; male gonad development [GO:0008584]; negative regulation of bone mineralization [GO:0030502]; negative regulation of cell growth [GO:0030308]; negative regulation of endopeptidase activity [GO:0010951]; negative regulation of insu…	collagen-containing extracellular matrix [GO:0062023]; extracellular matrix [GO:0031012]; extracellular region [GO:0005576]; extracellular space [GO:0005615]; protein-containing complex [GO:0032991]
P15684	Anpep	29.5503	29.5633	29.1404	29.7421	28.5741	29.1892	28.7373	28.5873	29.4881	29.4213		Anpep	-0.229377	0.431519	1.17233	angiogenesis [GO:0001525]; cell differentiation [GO:0030154]; negative regulation of renal sodium excretion [GO:0035814]; peptide catabolic process [GO:0043171]; proteolysis [GO:0006508]; regulation of blood pressure [GO:0008217]; signal transduction [GO:0007165]	brush border membrane [GO:0031526]; cytoplasm [GO:0005737]; endoplasmic reticulum-Golgi intermediate compartment [GO:0005793]; external side of plasma membrane [GO:0009897]; extracellular exosome [GO:0070062]; extracellular space [GO:0005615]; integral component of membrane [GO:0016021]; plasma membrane [GO:0005886]
P62804	Hist1h4b	27.6534	26.7972	26.4354	26.3413	27.2287	28.3755	27.3848	27.0524	25.8104	27.8454		Hist1h4b	0.402493	0.442108	1.32179	cell differentiation [GO:0030154]; DNA replication-dependent chromatin assembly [GO:0006335]; DNA replication-independent chromatin assembly [GO:0006336]; DNA-templated transcription, initiation [GO:0006352]; negative regulation of megakaryocyte differentiation [GO:0045653]; nucleosome assembly [GO:0006334]; ossification [GO:0001503]	CENP-A containing nucleosome [GO:0043505]; extracellular region [GO:0005576]; nuclear chromosome [GO:0000228]; nucleoplasm [GO:0005654]; nucleosome [GO:0000786]; nucleus [GO:0005634]; protein-containing complex [GO:0032991]
P20611	Acp2	26.1634	25.4121	24.9679	25.3153	25.028	25.0732	25.2433	25.5494	25.0404	25.0344		Acp2	-0.189187	0.444142	1.14012	autophagic cell death [GO:0048102]; chemical synaptic transmission [GO:0007268]; dephosphorylation [GO:0016311]; lysosome organization [GO:0007040]; response to organic substance [GO:0010033]; skeletal system development [GO:0001501]	cytoplasmic vesicle [GO:0031410]; integral component of membrane [GO:0016021]; lysosomal lumen [GO:0043202]; lysosomal membrane [GO:0005765]; lysosome [GO:0005764]; neuron projection [GO:0043005]; synapse [GO:0045202]
Q6P767	Pttg1ip	26.5321	26.5009	26.083	26.7557	25.6718	26.1911	25.821	26.3771	26.229	26.0827		Pttg1ip	-0.168501	0.45352	1.12389	negative regulation of DNA damage response, signal transduction by p53 class mediator [GO:0043518]; negative regulation of intrinsic apoptotic signaling pathway by p53 class mediator [GO:1902254]; positive regulation of cellular protein catabolic process [GO:1903364]; positive regulation of protein ubiquitination [GO:0031398]; protein import into nucleus [GO:0006606]	cytoplasm [GO:0005737]; integral component of membrane [GO:0016021]; nucleus [GO:0005634]; plasma membrane [GO:0005886]
P01835	P01835	33.2004	33.3797	33.2418	32.9062	33.4062	33.4734	33.3266	33.9343	32.6878	33.5915		P01835	0.175865	0.454105	1.12964	regulation of immune response [GO:0050776]
P29598	Plau	29.4984	28.7078	28.8708	29.2324	28.516	29.1257	29.1997	29.1704	26.6991	28.6937		Plau	-0.387394	0.469766	1.30803	angiogenesis [GO:0001525]; cellular response to fluid shear stress [GO:0071498]; cellular response to glucose stimulus [GO:0071333]; cellular response to hepatocyte growth factor stimulus [GO:0035729]; cellular response to hypoxia [GO:0071456]; cellular response to lipopolysaccharide [GO:0071222]; cellular response to organic substance [GO:0071310]; cellular response to staurosporine [GO:0072734]…	cell surface [GO:0009986]; extracellular space [GO:0005615]; membrane [GO:0016020]; protein complex involved in cell-matrix adhesion [GO:0098637]; serine protease inhibitor complex [GO:0097180]; serine-type endopeptidase complex [GO:1905370]
P09006	Serpina3n	26.7653	27.5065	27.7894	26.8816	26.9064	26.92	27.0374	27.1134	24.9509	27.8528		Serpina3n	-0.394958	0.473195	1.3149	cellular response to cAMP [GO:0071320]; cellular response to glucocorticoid stimulus [GO:0071385]; cellular response to interferon-gamma [GO:0071346]; cellular response to interleukin-1 [GO:0071347]; cellular response to interleukin-6 [GO:0071354]; inflammatory response [GO:0006954]; negative regulation of endopeptidase activity [GO:0010951]; response to bacterium [GO:0009617]; response to cytoki…	extracellular region [GO:0005576]; extracellular space [GO:0005615]
Q6AYS7	Acy1a;Acy1b	25.3002	25.4861	25.1832	26.4939	25.3079	25.0728	25.9066	25.0696	25.7479	24.8301		Acy1a;Acy1b	-0.228888	0.494093	1.17193	cellular amino acid metabolic process [GO:0006520]; protein catabolic process [GO:0030163]	cytoplasm [GO:0005737]; extracellular exosome [GO:0070062]
Q01460	Ctbs	27.4219	26.745	26.6053	26.307	26.1104	26.8997	26.8345	26.9692	26.0724	27.6006		Ctbs	0.237364	0.494228	1.17884	chitin catabolic process [GO:0006032]; oligosaccharide catabolic process [GO:0009313]	lysosome [GO:0005764]
P50137	Tkt	22.7888	21.6702	22.8618	23.7401	22.4557	22.6733	22.0161	23.0813	22.0378	22.3197		Tkt	-0.277677	0.497685	1.21224	glyceraldehyde-3-phosphate biosynthetic process [GO:0046166]; pentose-phosphate shunt [GO:0006098]; pentose-phosphate shunt, non-oxidative branch [GO:0009052]; regulation of growth [GO:0040008]; ribose phosphate biosynthetic process [GO:0046390]	endoplasmic reticulum membrane [GO:0005789]; intracellular membrane-bounded organelle [GO:0043231]; peroxisome [GO:0005777]
P81828	P81828	33.0785	33.4265	32.3094	31.6754	33.2219	33.0084	32.9792	32.9093	31.0333	31.9883		P81828	-0.358643	0.499301	1.28222		extracellular region [GO:0005576]
P29975	Aqp1	25.4143	27.1799	25.5582	27.6258	26.9409	26.2207	26.3739	26.6877	28.3905	27.128		Aqp1	0.416347	0.502109	1.33454	ammonium transmembrane transport [GO:0072488]; camera-type eye morphogenesis [GO:0048593]; carbon dioxide transmembrane transport [GO:0035378]; carbon dioxide transport [GO:0015670]; cellular homeostasis [GO:0019725]; cellular hyperosmotic response [GO:0071474]; cellular response to cAMP [GO:0071320]; cellular response to copper ion [GO:0071280]; cellular response to dexamethasone stimulus [GO:00…	apical part of cell [GO:0045177]; apical plasma membrane [GO:0016324]; axon [GO:0030424]; axon terminus [GO:0043679]; basal plasma membrane [GO:0009925]; basolateral plasma membrane [GO:0016323]; brush border [GO:0005903]; brush border membrane [GO:0031526]; caveola [GO:0005901]; cytoplasm [GO:0005737]; extracellular exosome [GO:0070062]; integral component of membrane [GO:0016021]; membrane [GO:…
P06760	Gusb	30.6528	27.9544	29.0304	29.1964	30.6103	30.1234	27.1607	31.5741	27.3288	27.9243		Gusb	-0.666628	0.527026	1.58736	carbohydrate metabolic process [GO:0005975]; glucuronoside catabolic process [GO:0019391]	extracellular space [GO:0005615]; lysosome [GO:0005764]
Q9WTW7	Slc23a1	25.076	25.6083	26.1544	25.8132	25.0885	25.1953	25.2417	24.9073	26.2111	25.1712		Slc23a1	-0.202744	0.527084	1.15089	brain development [GO:0007420]; dehydroascorbic acid transport [GO:0070837]; L-ascorbic acid transmembrane transport [GO:0015882]; lung development [GO:0030324]; response to toxic substance [GO:0009636]; sodium ion transport [GO:0006814]; transepithelial L-ascorbic acid transport [GO:0070904]	apical plasma membrane [GO:0016324]; basal plasma membrane [GO:0009925]; brush border [GO:0005903]; cytoplasm [GO:0005737]; integral component of plasma membrane [GO:0005887]; intracellular organelle [GO:0043229]; plasma membrane [GO:0005886]
P28826	Mep1b	28.3	28.6737	28.3051	28.5715	28.3784	27.918	27.9744	28.2089	29.2653	27.9899		Mep1b	-0.174432	0.527857	1.12852	inflammatory response [GO:0006954]; proteolysis [GO:0006508]; toxin transport [GO:1901998]	extracellular region [GO:0005576]; integral component of plasma membrane [GO:0005887]; membrane [GO:0016020]; meprin A complex [GO:0017090]
P10960	Psap	26.6842	26.6255	26.1645	25.8133	26.402	26.0515	25.9993	26.5269	26.5905	25.8808		Psap	-0.128103	0.569914	1.09286	adenylate cyclase-inhibiting G protein-coupled receptor signaling pathway [GO:0007193]; antigen processing and presentation [GO:0019882]; cellular response to organic substance [GO:0071310]; ceramide metabolic process [GO:0006672]; cerebellar Purkinje cell differentiation [GO:0021702]; cochlea development [GO:0090102]; corneocyte development [GO:0003335]; cornified envelope assembly [GO:1903575];…	aggresome [GO:0016235]; cytoplasm [GO:0005737]; extracellular region [GO:0005576]; extracellular space [GO:0005615]; late endosome [GO:0005770]; lysosome [GO:0005764]
Q5XI43	Mxra8	29.2393	28.9529	28.8268	28.7986	29.172	28.7588	28.8521	29.3559	28.9161	28.6718		Mxra8	-0.0869961	0.574296	1.06216	cell adhesion [GO:0007155]; establishment of glial blood-brain barrier [GO:0060857]	bicellular tight junction [GO:0005923]; cell surface [GO:0009986]; ciliary membrane [GO:0060170]; cytoplasm [GO:0005737]; integral component of membrane [GO:0016021]; nucleus [GO:0005634]
P63018	Hspa8	26.4175	26.8412	26.8794	27.5006	26.9709	27.5737	26.407	27.2844	27.353	26.7908		Hspa8	0.159847	0.575096	1.11717	aging [GO:0007568]; ATP metabolic process [GO:0046034]; axo-dendritic transport [GO:0008088]; cellular response to cadmium ion [GO:0071276]; cellular response to heat [GO:0034605]; cellular response to unfolded protein [GO:0034620]; cerebellum development [GO:0021549]; chaperone cofactor-dependent protein refolding [GO:0051085]; chaperone-mediated autophagy [GO:0061684]; chaperone-mediated autoph…	asymmetric synapse [GO:0032279]; autophagosome [GO:0005776]; axon [GO:0030424]; cell surface [GO:0009986]; chaperone complex [GO:0101031]; cytoplasm [GO:0005737]; cytosol [GO:0005829]; dendrite [GO:0030425]; dendritic shaft [GO:0043198]; dendritic spine [GO:0043197]; extracellular exosome [GO:0070062]; glutamatergic synapse [GO:0098978]; glycinergic synapse [GO:0098690]; intermediate filament [GO…
P18292	F2	28.3083	27.6816	28.2045	28.0236	27.4656	27.9126	28.0599	28.5029	28.9529	27.2184		F2	0.192625	0.577705	1.14284	acute-phase response [GO:0006953]; antimicrobial humoral immune response mediated by antimicrobial peptide [GO:0061844]; blood coagulation [GO:0007596]; cell surface receptor signaling pathway [GO:0007166]; cellular response to mechanical stimulus [GO:0071260]; cytolysis by host of symbiont cells [GO:0051838]; fibrinolysis [GO:0042730]; negative regulation of astrocyte differentiation [GO:0048712…	collagen-containing extracellular matrix [GO:0062023]; extracellular space [GO:0005615]
P05544	Serpina3l	32.7833	33.3832	32.634	32.676	33.0527	32.6467	33.1192	32.938	32.0957	33.0704		Serpina3l	-0.131852	0.589598	1.0957	negative regulation of endopeptidase activity [GO:0010951]	extracellular space [GO:0005615]
P08932	P08932	29.3424	30.1044	30.3846	28.9617	29.7192	29.195	29.5061	29.6719	29.7818	29.6496		P08932	-0.14157	0.62049	1.1031	acute-phase response [GO:0006953]; negative regulation of blood coagulation [GO:0030195]; negative regulation of endopeptidase activity [GO:0010951]; positive regulation of cytosolic calcium ion concentration [GO:0007204]; vasodilation [GO:0042311]	extracellular region [GO:0005576]; extracellular space [GO:0005615]
P00689	Amy2	31.9717	32.2199	31.924	31.9865	32.7906	31.7913	31.9643	32.3637	31.8187	32.4194		Amy2	-0.107096	0.623678	1.07706	carbohydrate catabolic process [GO:0016052]	extracellular space [GO:0005615]
O35763	Msn	26.1007	26.991	26.8696	27.6559	26.1246	26.4635	26.0151	26.7651	27.1281	26.5247		Msn	-0.169056	0.636984	1.12432	cellular response to testosterone stimulus [GO:0071394]; establishment of endothelial barrier [GO:0061028]; establishment of epithelial cell apical/basal polarity [GO:0045198]; gland morphogenesis [GO:0022612]; immunological synapse formation [GO:0001771]; leukocyte cell-cell adhesion [GO:0007159]; leukocyte migration [GO:0050900]; membrane to membrane docking [GO:0022614]; positive regulation of…	adherens junction [GO:0005912]; apical part of cell [GO:0045177]; apical plasma membrane [GO:0016324]; basolateral plasma membrane [GO:0016323]; cell periphery [GO:0071944]; cell surface [GO:0009986]; cell tip [GO:0051286]; cytoplasmic side of plasma membrane [GO:0009898]; cytoskeleton [GO:0005856]; filopodium [GO:0030175]; filopodium membrane [GO:0031527]; microvillus [GO:0005902]; microvillus m…
O35568	Efemp1	25.1027	26.1294	24.5618	25.1247	25.5073	25.3432	25.3226	25.1154	26.1507	25.2493		Efemp1	0.151077	0.646766	1.1104	camera-type eye development [GO:0043010]; embryonic eye morphogenesis [GO:0048048]; epidermal growth factor receptor signaling pathway [GO:0007173]; negative regulation of chondrocyte differentiation [GO:0032331]; negative regulation of neuron projection development [GO:0010977]; peptidyl-tyrosine phosphorylation [GO:0018108]; positive regulation of cell population proliferation [GO:0008284]; pos…	basement membrane [GO:0005604]; cytoplasm [GO:0005737]; extracellular space [GO:0005615]
P04904	Gsta3;Gsta5	26.5483	26.9811	27.1308	28.3804	26.7099	26.9734	26.9651	26.8009	27.4799	26.7304		Gsta3;Gsta5	-0.16013	0.658996	1.11739	aging [GO:0007568]; epithelial cell differentiation [GO:0030855]; glutathione derivative biosynthetic process [GO:1901687]; glutathione metabolic process [GO:0006749]; linoleic acid metabolic process [GO:0043651]; prostaglandin metabolic process [GO:0006693]; response to nutrient levels [GO:0031667]; response to xenobiotic stimulus [GO:0009410]; xenobiotic catabolic process [GO:0042178]; xenobiot…	cytosol [GO:0005829]; organelle membrane [GO:0031090]
P01026	C3	28.8046	27.9771	28.9702	28.2716	28.4014	28.0987	30.6166	28.7008	26.5034	30.2361		C3	0.34615	0.663963	1.27116	amyloid-beta clearance [GO:0097242]; blood coagulation [GO:0007596]; cell surface receptor signaling pathway involved in cell-cell signaling [GO:1905114]; chemotaxis [GO:0006935]; complement activation [GO:0006956]; complement activation, alternative pathway [GO:0006957]; complement activation, classical pathway [GO:0006958]; complement-dependent cytotoxicity [GO:0097278]; complement-mediated syn…	cell surface [GO:0009986]; extracellular region [GO:0005576]; extracellular space [GO:0005615]; protein-containing complex [GO:0032991]
P02767	Ttr	28.1371	28.4116	28.686	27.1097	27.5959	28.1452	27.878	27.669	28.6884	28.2942		Ttr	0.146897	0.671565	1.10719	purine nucleobase metabolic process [GO:0006144]; retinol metabolic process [GO:0042572]; thyroid hormone metabolic process [GO:0042403]; thyroid hormone transport [GO:0070327]	extracellular space [GO:0005615]; protein-containing complex [GO:0032991]
Q6MG61	Clic1	24.7956	26.0077	26.3528	27.3997	25.0673	25.9178	25.5721	26.1471	25.099	25.7953		Clic1	-0.218353	0.674167	1.16341	chloride transport [GO:0006821]; glutathione metabolic process [GO:0006749]; positive regulation of osteoblast differentiation [GO:0045669]; regulation of cell cycle [GO:0051726]; regulation of ion transmembrane transport [GO:0034765]; regulation of mitochondrial membrane potential [GO:0051881]	chloride channel complex [GO:0034707]; cytoplasm [GO:0005737]; extracellular exosome [GO:0070062]; membrane [GO:0016020]; mitochondrion [GO:0005739]; nuclear envelope [GO:0005635]; nuclear membrane [GO:0031965]; nucleus [GO:0005634]; perinuclear region of cytoplasm [GO:0048471]; plasma membrane [GO:0005886]
Q63041	A1m	32.1655	31.9853	31.585	31.7521	31.9232	31.8545	32.3826	31.8469	31.0119	31.8057		A1m	-0.101902	0.68356	1.07319	embryo implantation [GO:0007566]	extracellular space [GO:0005615]
P10959	Ces1c	29.2724	28.9982	28.8649	27.5324	28.4425	28.6704	29.153	28.8404	28.0503	29.069		Ces1c	0.134542	0.7193	1.09774	lipid catabolic process [GO:0016042]	endoplasmic reticulum [GO:0005783]; endoplasmic reticulum lumen [GO:0005788]; lipid droplet [GO:0005811]
P81827	P81827	33.3303	33.6552	32.183	31.2443	33.3974	33.6631	33.2501	33.2897	32.82	31.7723		P81827	0.196973	0.734297	1.14629		extracellular region [GO:0005576]
P05545	Serpina3k	32.1491	32.7674	32.1322	32.0348	32.7211	32.0949	32.0705	32.5936	32.1717	32.5707		Serpina3k	-0.0606156	0.76514	1.04291	negative regulation of endopeptidase activity [GO:0010951]	extracellular space [GO:0005615]
Q64319	Slc3a1	28.9227	29.3936	28.7203	29.1989	28.4054	28.914	28.5145	28.8714	29.8015	28.9513		Slc3a1	0.08237	0.77202	1.05876	amino acid transport [GO:0006865]; aspartate transmembrane transport [GO:0015810]; carbohydrate metabolic process [GO:0005975]; gene expression [GO:0010467]; L-cystine transport [GO:0015811]; L-glutamate transmembrane transport [GO:0015813]	apical plasma membrane [GO:0016324]; brush border membrane [GO:0031526]; integral component of plasma membrane [GO:0005887]; plasma membrane [GO:0005886]; vacuolar membrane [GO:0005774]
Q64230	Mep1a	30.2957	30.7056	30.3912	30.4776	30.3236	30.4078	30.7584	30.6177	30.0869	30.5228		Mep1a	0.0399968	0.775246	1.02811	proteolysis [GO:0006508]	membrane [GO:0016020]; meprin A complex [GO:0017090]
Q9JJ19	Slc9a3r1	27.5946	28.8551	28.5802	29.4131	28.2338	27.9798	28.2018	28.9576	29.7355	28.4384		Slc9a3r1	0.127262	0.778244	1.09222	actin cytoskeleton organization [GO:0030036]; adenylate cyclase-activating dopamine receptor signaling pathway [GO:0007191]; auditory receptor cell stereocilium organization [GO:0060088]; bile acid secretion [GO:0032782]; cellular phosphate ion homeostasis [GO:0030643]; cellular protein localization [GO:0034613]; cerebrospinal fluid circulation [GO:0090660]; cilium organization [GO:0044782]; esta…	apical part of cell [GO:0045177]; apical plasma membrane [GO:0016324]; brush border membrane [GO:0031526]; cell periphery [GO:0071944]; cytoplasm [GO:0005737]; endomembrane system [GO:0012505]; extracellular region [GO:0005576]; filopodium [GO:0030175]; membrane [GO:0016020]; membrane raft [GO:0045121]; microvillus [GO:0005902]; microvillus membrane [GO:0031528]; perinuclear region of cytoplasm […
P00884	Aldob	25.2806	26.5627	26.0995	28.0267	26.0244	26.3537	26.0578	26.7175	27.2341	26.3169		Aldob	0.137203	0.790465	1.09977	cellular response to extracellular stimulus [GO:0031668]; cellular response to insulin stimulus [GO:0032869]; fructose 1,6-bisphosphate metabolic process [GO:0030388]; fructose metabolic process [GO:0006000]; glycolytic process [GO:0006096]; liver development [GO:0001889]; NADH oxidation [GO:0006116]; positive regulation of ATP-dependent activity [GO:0032781]; response to amino acid [GO:0043200];…	centriolar satellite [GO:0034451]; cytoplasm [GO:0005737]; cytosol [GO:0005829]; intracellular membrane-bounded organelle [GO:0043231]; lysosome [GO:0005764]; microtubule organizing center [GO:0005815]; nucleus [GO:0005634]; perinuclear region of cytoplasm [GO:0048471]; plasma membrane [GO:0005886]; rough endoplasmic reticulum membrane [GO:0030867]; smooth endoplasmic reticulum membrane [GO:00308…
Q01177	Plg	29.2722	29.8717	29.8882	29.2098	29.3236	29.4211	29.5672	29.3269	29.7086	29.7608		Plg	0.0438175	0.80527	1.03084	biological process involved in interaction with symbiont [GO:0051702]; blood coagulation [GO:0007596]; extracellular matrix disassembly [GO:0022617]; fibrinolysis [GO:0042730]; labyrinthine layer blood vessel development [GO:0060716]; mononuclear cell migration [GO:0071674]; muscle cell cellular homeostasis [GO:0046716]; myoblast differentiation [GO:0045445]; negative regulation of cell-substrate…	cell surface [GO:0009986]; extracellular space [GO:0005615]; extrinsic component of external side of plasma membrane [GO:0031232]; extrinsic component of plasma membrane [GO:0019897]; glutamatergic synapse [GO:0098978]; intracellular membrane-bounded organelle [GO:0043231]; plasma membrane [GO:0005886]; Schaffer collateral - CA1 synapse [GO:0098685]
P01048	Map1	28.3727	29.1219	29.1078	28.204	29.1844	28.3236	28.2422	28.6754	29.5603	28.8146		Map1	-0.0749476	0.818	1.05332	acute-phase response [GO:0006953]; negative regulation of blood coagulation [GO:0030195]; negative regulation of endopeptidase activity [GO:0010951]; positive regulation of cytosolic calcium ion concentration [GO:0007204]; vasodilation [GO:0042311]	extracellular region [GO:0005576]; extracellular space [GO:0005615]
P63259	Actg1;Actb	29.4128	30.6275	30.7688	31.7941	30.3498	30.0913	30.1519	30.6041	31.1208	30.4825		Actg1;Actb	-0.100493	0.818983	1.07214	angiogenesis [GO:0001525]; cellular response to interferon-gamma [GO:0071346]; morphogenesis of a polarized epithelium [GO:0001738]; positive regulation of cell migration [GO:0030335]; positive regulation of gene expression [GO:0010628]; positive regulation of wound healing [GO:0090303]; protein localization to bicellular tight junction [GO:1902396]; regulation of focal adhesion assembly [GO:0051…	actin cytoskeleton [GO:0015629]; actin filament [GO:0005884]; apical junction complex [GO:0043296]; apical part of cell [GO:0045177]; basal body patch [GO:0120220]; calyx of Held [GO:0044305]; cell-cell junction [GO:0005911]; cytoskeleton [GO:0005856]; cytosol [GO:0005829]; dense body [GO:0097433]; extracellular exosome [GO:0070062]; filamentous actin [GO:0031941]; focal adhesion [GO:0005925]; my…
P10252	Cd48	26.7056	26.9767	26.7543	26.6883	26.5549	27.2697	27.7171	27.2264	24.8039	27.2018		Cd48	0.107812	0.841882	1.07759	mast cell activation [GO:0045576]; regulation of adaptive immune response [GO:0002819]; signal transduction [GO:0007165]; T cell activation [GO:0042110]	anchored component of plasma membrane [GO:0046658]; external side of plasma membrane [GO:0009897]; membrane raft [GO:0045121]; plasma membrane [GO:0005886]; protein-containing complex [GO:0032991]
P21704	Dnase1	31.8181	31.5392	31.7939	32.1669	31.9575	31.7259	32.0952	32.8976	30.8132	32.0423		Dnase1	0.0597388	0.869406	1.04228	apoptotic process [GO:0006915]; DNA catabolic process [GO:0006308]; DNA catabolic process, endonucleolytic [GO:0000737]; neutrophil activation involved in immune response [GO:0002283]; regulation of acute inflammatory response [GO:0002673]; regulation of neutrophil mediated cytotoxicity [GO:0070948]	extracellular region [GO:0005576]; nuclear envelope [GO:0005635]; nucleus [GO:0005634]; zymogen granule [GO:0042588]
Q6AXR4	Hexb	25.2316	25.4879	25.418	24.9591	25.5709	24.3094	25.2731	25.4134	26.6312	25.3663		Hexb	0.0651785	0.869681	1.04621	astrocyte cell migration [GO:0043615]; cellular calcium ion homeostasis [GO:0006874]; cellular protein metabolic process [GO:0044267]; ganglioside catabolic process [GO:0006689]; glycosaminoglycan metabolic process [GO:0030203]; glycosphingolipid metabolic process [GO:0006687]; lipid storage [GO:0019915]; locomotory behavior [GO:0007626]; lysosome organization [GO:0007040]; male courtship behavio…	acrosomal vesicle [GO:0001669]; azurophil granule [GO:0042582]; beta-N-acetylhexosaminidase complex [GO:1905379]; cortical granule [GO:0060473]; extracellular space [GO:0005615]; lysosome [GO:0005764]; membrane [GO:0016020]
O55006	O55006	26.4315	25.8291	26.5783	26.1247	25.6163	26.4973	26.7081	26.3198	24.8524	25.9103		O55006	-0.058402	0.879933	1.04131	bone remodeling [GO:0046849]	extracellular region [GO:0005576]
P09034	Ass1	23.0106	23.7619	24.2502	26.398	23.4929	24.6175	23.9272	24.1279	24.3692	23.5853		Ass1	-0.0573246	0.928061	1.04053	acute-phase response [GO:0006953]; aging [GO:0007568]; arginine biosynthetic process [GO:0006526]; argininosuccinate metabolic process [GO:0000053]; aspartate metabolic process [GO:0006531]; cellular response to amine stimulus [GO:0071418]; cellular response to amino acid stimulus [GO:0071230]; cellular response to ammonium ion [GO:0071242]; cellular response to cAMP [GO:0071320]; cellular respon…	cell body fiber [GO:0070852]; cytoplasm [GO:0005737]; cytosol [GO:0005829]; endoplasmic reticulum [GO:0005783]; lysosome [GO:0005764]; mitochondrial outer membrane [GO:0005741]; mitochondrion [GO:0005739]; neuronal cell body [GO:0043025]; neuron projection [GO:0043005]; nucleoplasm [GO:0005654]; nucleus [GO:0005634]; perikaryon [GO:0043204]
P36953	Afm	30.1761	29.6929	29.7008	29.0086	29.601	29.4241	29.4363	29.2508	30.5214	29.4329		Afm	-0.0227572	0.94056	1.0159	protein stabilization [GO:0050821]; protein transport within extracellular region [GO:0071693]; vitamin transport [GO:0051180]	cytoplasm [GO:0005737]; extracellular space [GO:0005615]
P51635	Akr1a1	25.0218	26.9449	26.0529	28.0008	26.1242	26.7498	26.3539	27.1419	25.3709	26.3135		Akr1a1	-0.0429282	0.942662	1.0302	aldehyde catabolic process [GO:0046185]; cellular detoxification of aldehyde [GO:0110095]; daunorubicin metabolic process [GO:0044597]; D-glucuronate catabolic process [GO:0042840]; doxorubicin metabolic process [GO:0044598]; L-ascorbic acid biosynthetic process [GO:0019853]; lipid metabolic process [GO:0006629]	apical plasma membrane [GO:0016324]; cytosol [GO:0005829]; synapse [GO:0045202]
Q62867	Ggh	29.5775	28.8838	28.6214	28.6101	29.0479	28.763	28.6829	29.156	29.2695	28.9429		Ggh	0.0147183	0.945821	1.01025	poly-gamma-glutamate metabolic process [GO:0070500]; response to ethanol [GO:0045471]; response to insulin [GO:0032868]; response to xenobiotic stimulus [GO:0009410]; response to zinc ion [GO:0010043]; tetrahydrofolylpolyglutamate metabolic process [GO:0046900]	cytosol [GO:0005829]; extracellular space [GO:0005615]; lysosome [GO:0005764]; melanosome [GO:0042470]; vacuole [GO:0005773]
Q62930	C9	25.3088	26.1634	26.619	25.9967	25.9973	25.5545	26.0844	26.0678	25.6186	26.697		C9	-0.012598	0.966861	1.00877	blood coagulation [GO:0007596]; cell killing [GO:0001906]; complement activation, alternative pathway [GO:0006957]; complement activation, classical pathway [GO:0006958]; cytolysis [GO:0019835]; protein homooligomerization [GO:0051260]	extracellular space [GO:0005615]; membrane attack complex [GO:0005579]; plasma membrane [GO:0005886]
P07522	Egf	33.8922	33.3654	33.1126	32.8507	33.4073	33.2973	33.5952	33.3223	33.4571	32.9859		Egf	0.00593136	0.977157	1.00412	angiogenesis [GO:0001525]; branching morphogenesis of an epithelial tube [GO:0048754]; epidermal growth factor receptor signaling pathway [GO:0007173]; epidermal growth factor receptor signaling pathway via MAPK cascade [GO:0038029]; ERK1 and ERK2 cascade [GO:0070371]; intracellular signal transduction [GO:0035556]; kidney development [GO:0001822]; mammary gland alveolus development [GO:0060749];…	extracellular exosome [GO:0070062]; extracellular space [GO:0005615]; integral component of membrane [GO:0016021]; plasma membrane [GO:0005886]
Q9JJ40	Pdzk1	27.1132	29.2589	28.7491	29.3259	28.1392	28.2854	28.6241	28.9121	28.2899	28.4323		Pdzk1	-0.00845659	0.984695	1.00588	carnitine transport [GO:0015879]; cholesterol transport [GO:0030301]; intracellular transport [GO:0046907]; in utero embryonic development [GO:0001701]; positive regulation of cation transmembrane transport [GO:1904064]; positive regulation of ion transmembrane transporter activity [GO:0032414]; positive regulation of protein localization to membrane [GO:1905477]; positive regulation of protein t…	apical plasma membrane [GO:0016324]; brush border [GO:0005903]; brush border membrane [GO:0031526]; membrane raft [GO:0045121]; microvillus membrane [GO:0031528]; plasma membrane [GO:0005886]
P04642	Ldha	24.3364	24.0122	24.5333	25.5505	23.2604	24.4606	24.5012	23.834	24.9266	23.9892		Ldha	0.00376251	0.993083	1.00261	cellular response to extracellular stimulus [GO:0031668]; glucose catabolic process to lactate via pyruvate [GO:0019661]; lactate metabolic process [GO:0006089]; NAD metabolic process [GO:0019674]; positive regulation of apoptotic process [GO:0043065]; post-embryonic animal organ development [GO:0048569]; pyruvate metabolic process [GO:0006090]; response to cAMP [GO:0051591]; response to estrogen…	cytosol [GO:0005829]; oxidoreductase complex [GO:1990204]; sperm fibrous sheath [GO:0035686]
P14740	Dpp4	29.6544	29.673	29.2313	29.8154	29.1258	29.351	29.3628	29.2258	30.1882	29.3676		Dpp4	-0.000873735	0.996936	1.00061	B-1a B cell differentiation [GO:0002337]; behavioral fear response [GO:0001662]; cell adhesion [GO:0007155]; endothelial cell migration [GO:0043542]; establishment of localization [GO:0051234]; locomotory exploration behavior [GO:0035641]; negative regulation of extracellular matrix disassembly [GO:0010716]; negative regulation of neutrophil chemotaxis [GO:0090024]; positive regulation of cell po…	apical plasma membrane [GO:0016324]; cell surface [GO:0009986]; endocytic vesicle [GO:0030139]; endoplasmic reticulum [GO:0005783]; extracellular region [GO:0005576]; Golgi apparatus [GO:0005794]; integral component of membrane [GO:0016021]; intercellular canaliculus [GO:0046581]; lamellipodium [GO:0030027]; lamellipodium membrane [GO:0031258]; membrane raft [GO:0045121]; plasma membrane [GO:0005…
